# Supplementary material for: Discovery of Signature Cyclic Immonium Ion for Lactyllysine Reveals Widespread and Functional Lactylation on Non-histone Proteins
Source: Research Square preprint supplement (doi:10.21203/rs.3.rs-916390/v1), 2021-09-24
Supplement: Supplementary file 2 [file 1a34a1195461079fb42e7e7c.xlsx]

## Sheet: Sheet1
Summary of the lactylated PSMs identified from the 14 human cell lines available in the Meltome Atlas
Cell line	Accession	Peptide	K site	start	end	RT	Scan	cycIm/BP(%)	AScore
Jurkat-R1	O14672	L(+229.16)PPPK(+72.02)P	714	710	715	80.15	F11:36197	0.271031	L1:TMT10plex:1000.00;K5:Lac:1000.00
Jurkat-R1	Q8WVM8	Y(+229.16)FDPK(+72.02)MLR	572	568	575	60.34	F13:24856	0.0808441	Y1:TMT10plex:1000.00;K5:Lac:1000.00
Jurkat-R1	P78371	A(+229.16)NRTPGK(+72.02)EAVAMESYAK(+229.16)	431	425	441	67.29	F13:28329	1.59675	A1:TMT10plex:1000.00;K7:Lac:149.94;K17:TMT10plex:1000.00
Jurkat-R1	P00441	K(+229.16)(+72.02)HGGPK(+229.16)DEER	71	71	80	27.62	F16:10276	9.28099	K1:TMT10plex:1000.00;K1:Lac:1000.00;K6:TMT10plex:1000.00
Jurkat-R1	P00441	K(+229.16)(+72.02)HGGPK(+229.16)DEER	71	71	80	27.64	F16:10288	14.2186	K1:TMT10plex:1000.00;K1:Lac:1000.00;K6:TMT10plex:1000.00
Jurkat-R1	Q9Y394	I(+229.16)ENFK(+72.02)SGVDADSSYFK(+229.16)	321	317	332	77.22	F17:32949	29.0329	I1:TMT10plex:1000.00;K5:Lac:194.28;K16:TMT10plex:1000.00
Jurkat-R1	Q9Y394	I(+229.16)ENFK(+72.02)SGVDADSSYFK(+229.16)	321	317	332	77.25	F17:32963	26.8711	I1:TMT10plex:1000.00;K5:Lac:213.66;K16:TMT10plex:1000.00
Jurkat-R1	Q8N2K1	K(+42.01)(+72.02)QDYLR	18	18	23	38.93	F19:15398	1.48112	K1:Acetylation (Protein N-term):1000.00;K1:Lac:1000.00
Jurkat-R1	P14314	S(+229.16)LK(+72.02)DMEESIR	385	383	392	63.4	F19:27121	2.42716	S1:TMT10plex:1000.00;K3:Lac:1000.00
Jurkat-R1	P09429	T(+229.16)YIPPK(+72.02)GETK(+229.16)	82	77	86	47.34	F2:19526	0.542498	T1:TMT10plex:1000.00;K6:Lac:23.85;K10:TMT10plex:1000.00
Jurkat-R1	P09104	D(+229.16)GK(+72.02)YDLDFK(+229.16)	256	254	262	72.48	F20:30045	1.55464	D1:TMT10plex:1000.00;K3:Lac:123.86;K9:TMT10plex:1000.00
Jurkat-R1	P33991	L(+229.16)SNK(+72.02)VEAIDVEEAK(+229.16)R	752	749	763	62.44	F22:26544	1.45771	L1:TMT10plex:1000.00;K4:Lac:103.70;K14:TMT10plex:1000.00
Jurkat-R1	Q58FF7	E(+229.16)K(+72.02)FENLC(+57.02)K(+229.16)	432	431	438	64.38	F22:27487	1.52407	E1:TMT10plex:1000.00;K2:Lac:156.85;C7:Carbamidomethylation:1000.00;K8:TMT10plex:1000.00
Jurkat-R1	Q9UKK9	H(+229.16)ANAK(+229.16)PFEVPFLK(+72.02)F	218	206	219	97.11	F22:43551	1.14204	H1:TMT10plex:1000.00;K5:TMT10plex:1000.00;K13:Lac:107.29
Jurkat-R1	Q9UL46	T(+229.16)K(+72.02)VEAFQTTISK(+229.16)	156	155	166	80.28	F24:36211	0.957995	T1:TMT10plex:1000.00;K2:Lac:244.37;K12:TMT10plex:1000.00
Jurkat-R1	P62328	K(+229.16)(+72.02)TETQEK(+229.16)NPLPSK(+229.16)ETIEQEK(+229.16)	20	20	39	57.95	F3:23774	1.158	K1:TMT10plex:1000.00;K1:Lac:1000.00;K7:TMT10plex:1000.00;K13:TMT10plex:1000.00;K20:TMT10plex:1000.00
Jurkat-R1	P62328	T(+229.16)ETQEK(+72.02)NPLPSK(+229.16)ETIEQEK(+229.16)	26	21	39	65.28	F3:27315	1.13971	T1:TMT10plex:1000.00;K6:Lac:129.19;K12:TMT10plex:1000.00;K19:TMT10plex:1000.00
Jurkat-R1	P62328	T(+229.16)ETQEK(+229.16)NPLPSK(+72.02)ETIEQEK(+229.16)	32	21	39	73.22	F6:31008	6.67707	T1:TMT10plex:1000.00;K6:TMT10plex:1000.00;K12:Lac:61.82;K19:TMT10plex:1000.00
Jurkat-R1	P14618	T(+229.16)ATESFASDPILYRPVAVALDTK(+72.02)GPEIR	115	93	120	107.52	F8:48923	2.11733	T1:TMT10plex:1000.00;K23:Lac:1000.00
Jurkat-R1	O75347	M(+229.16)RAEDGENYDIK(+72.02)K(+229.16)	51	40	52	47.11	F9:18793	1.19565	M1:TMT10plex:1000.00;K12:Lac:30.46;K13:TMT10plex:1000.00
Jurkat-R1	Q9Y394	R(+229.16)IENFK(+72.02)SGVDADSSYFK(+229.16)	321	316	332	65.2	F9:27653	0.540014	R1:TMT10plex:1000.00;K6:Lac:175.94;K17:TMT10plex:1000.00
Jurkat-R1	P08133	E(+229.16)IK(+72.02)DAISGIGTDEK(+229.16)	102	100	113	69.56	F9:29876	5.17851	E1:TMT10plex:1000.00;K3:Lac:128.38;K14:TMT10plex:1000.00
Jurkat-R1	P06733	S(+229.16)GK(+72.02)YDLDFK(+229.16)SPDDPSR	256	254	269	72.81	F9:31538	4.93169	S1:TMT10plex:1000.00;K3:Lac:22.09;K9:TMT10plex:1000.00
Jurkat-R1	P04406	V(+229.16)IISAPSADAPMFVMGVNHEK(+72.02)YDNSLK(+229.16)	139	119	145	101.91	F9:46602	3.44128	V1:TMT10plex:1000.00;K21:Lac:56.47;K27:TMT10plex:1000.00
Jurkat-R2	Q9Y394	I(+229.16)ENFK(+72.02)SGVDADSSYFK(+229.16)	321	317	332	77.77	F15:33119	30.5778	I1:TMT10plex:1000.00;K5:Lac:160.69;K16:TMT10plex:1000.00
Jurkat-R2	P07195	I(+229.16)VADK(+72.02)DYSVTANSK(+229.16)	82	78	91	77.62	F20:33562	0.896128	I1:TMT10plex:1000.00;K5:Lac:276.35;K14:TMT10plex:1000.00
Jurkat-R2	P04406	V(+229.16)IISAPSADAPMFVMGVNHEK(+72.02)YDNSLK(+229.16)	139	119	145	102.73	F9:46339	5.74863	V1:TMT10plex:1000.00;K21:Lac:62.39;K27:TMT10plex:1000.00
Jurkat-R2	P61604	V(+229.16)GDK(+72.02)VLLPEYGGTK(+229.16)	70	67	80	92.6	F3:40427	4.51373	V1:TMT10plex:1000.00;K4:Lac:132.72;K14:TMT10plex:1000.00
Jurkat-R2	P61604	V(+229.16)GDK(+72.02)VLLPEYGGTK(+229.16)	70	67	80	90.85	F23:39644	0.630139	V1:TMT10plex:1000.00;K4:Lac:213.35;K14:TMT10plex:1000.00
Jurkat-R2	P08195	L(+229.16)K(+72.02)LEPHEGLLLR	615	614	625	91.83	F5:40026	0.649814	L1:TMT10plex:1000.00;K2:Lac:1000.00
Jurkat-R2	Q9Y394	R(+229.16)IENFK(+72.02)SGVDADSSYFK(+229.16)	321	316	332	65.83	F9:27853	0.584859	R1:TMT10plex:1000.00;K6:Lac:158.53;K17:TMT10plex:1000.00
Jurkat-R2	P39019	P(+229.16)GVTVK(+72.02)DVNQQEFVR	7	2	16	79.9	F19:35927	2.07253	P1:TMT10plex:1000.00;K6:Lac:1000.00
Jurkat-R2	P00558	L(+229.16)TLDK(+72.02)LDVK(+229.16)	11	7	15	100.14	F6:43930	2.54156	L1:TMT10plex:1000.00;K5:Lac:83.66;K9:TMT10plex:1000.00
Jurkat-R2	P09104	D(+229.16)GK(+72.02)YDLDFK(+229.16)	256	254	262	72.68	F15:30653	1.69035	D1:TMT10plex:1000.00;K3:Lac:176.18;K9:TMT10plex:1000.00
Jurkat-R2	P08133	E(+229.16)IK(+72.02)DAISGIGTDEK(+229.16)	102	100	113	70.21	F9:30023	3.91552	E1:TMT10plex:1000.00;K3:Lac:109.55;K14:TMT10plex:1000.00
Jurkat-R2	P06733	S(+229.16)GK(+72.02)YDLDFK(+229.16)SPDDPSR	256	254	269	73.44	F9:31640	3.89856	S1:TMT10plex:1000.00;K3:Lac:36.87;K9:TMT10plex:1000.00
Jurkat-R2	P61956	A(+229.16)DEK(+72.02)PK(+229.16)EGVK(+229.16)	5	2	11	37.63	F20:14385	1.06092	A1:TMT10plex:1000.00;K4:Lac:45.01;K6:TMT10plex:1000.00;K10:TMT10plex:1000.00
K562-R1	P07195	L(+229.16)K(+72.02)DDEVAQLK(+229.16)K(+229.16)	310	309	319	87.31	F18:39791	4.29675	L1:TMT10plex:1000.00;K2:Lac:46.32;K10:TMT10plex:1000.00;K11:TMT10plex:1000.00
K562-R1	P78559	D(+229.16)K(+72.02)DLEEK(+229.16)	1434	1433	1439	71.78	F9:29940	1.12121	D1:TMT10plex:1000.00;K2:Lac:139.79;K7:TMT10plex:1000.00
K562-R2	Q9Y394	I(+229.16)ENFK(+72.02)SGVDADSSYFK(+229.16)	321	317	332	86.11	F3:40821	39.0025	I1:TMT10plex:1000.00;K5:Lac:90.32;K16:TMT10plex:1000.00
K562-R2	P06733	S(+229.16)GK(+229.16)YDLDFK(+72.02)SPDDPSR	262	254	269	81.88	F12:37625	19.4267	S1:TMT10plex:1000.00;K3:TMT10plex:1000.00;K9:Lac:53.33
K562-R2	P78559	D(+229.16)K(+72.02)DLEEK(+229.16)	1434	1433	1439	68.51	F9:29100	4.32401	D1:TMT10plex:1000.00;K2:Lac:169.90;K7:TMT10plex:1000.00
HEK293-R1	P61604	G(+229.16)K(+72.02)GGEIQPVSVK(+229.16)	56	55	66	63.14	F16:21494	1.18171	G1:TMT10plex:1000.00;K2:Lac:210.00;K12:TMT10plex:1000.00
HEK293-R1	P10809	V(+229.16)TK(+72.02)DGVTVAK(+229.16)	75	73	82	67.75	F19:23223	1.48379	V1:TMT10plex:1000.00;K3:Lac:161.52;K10:TMT10plex:1000.00
HEK293T-R1	P08238	E(+229.16)EEDK(+229.16)DDEEK(+72.02)PK(+229.16)	247	238	249	48.97	F7:17743	48.1608	E1:TMT10plex:1000.00;K5:TMT10plex:1000.00;K10:Lac:26.31;K12:TMT10plex:1000.00
HEK293T-R1	P07900	E(+229.16)DK(+72.02)EEEK(+229.16)	241	239	245	46.13	F5:16343	15.2961	E1:TMT10plex:1000.00;K3:Lac:111.84;K7:TMT10plex:1000.00
HEK293T-R2	P07195	L(+229.16)K(+72.02)DDEVAQLK(+229.16)	310	309	318	77.67	F7:33449	19.4995	L1:TMT10plex:1000.00;K2:Lac:170.86;K10:TMT10plex:1000.00
HEK293T-R2	P60842	K(+229.16)(+72.02)EELTLEGIR	238	238	247	76.59	F3:31913	3.52986	K1:TMT10plex:1000.00;K1:Lac:1000.00
HEK293T-R2	P16152	T(+229.16)DM(+15.99)AGPK(+72.02)ATK(+229.16)	239	233	242	31.57	F3:9103	42.088	T1:TMT10plex:1000.00;M3:Oxidation (M):1000.00;K7:Lac:38.16;K10:TMT10plex:1000.00
A549-R1	P62328	T(+229.16)ETQEK(+229.16)NPLPSK(+72.02)ETIEQEK(+229.16)	32	21	39	59.41	F6:19944	8.29419	T1:TMT10plex:1000.00;K6:TMT10plex:1000.00;K12:Lac:44.72;K19:TMT10plex:1000.00
A549-R1	P07737	T(+229.16)DK(+72.02)TLVLLMGK(+229.16)	108	106	116	91.16	F6:32512	1.31824	T1:TMT10plex:1000.00;K3:Lac:193.63;K11:TMT10plex:1000.00
A549-R1	Q9UKK9	H(+229.16)ANAK(+229.16)PFEVPFLK(+72.02)F	218	206	219	81.31	F20:29276	3.8475	H1:TMT10plex:1000.00;K5:TMT10plex:1000.00;K13:Lac:99.62
A549-R1	P00352	I(+229.16)LDLIESGK(+72.02)K(+229.16)	362	354	363	92.43	F24:31872	6.03449	I1:TMT10plex:1000.00;K9:Lac:33.98;K10:TMT10plex:1000.00
A549-R1	P07195	L(+229.16)K(+229.16)DDEVAQLK(+72.02)K(+229.16)	318	309	319	59.97	F12:19904	4.86658	L1:TMT10plex:1000.00;K2:TMT10plex:1000.00;K10:Lac:26.02;K11:TMT10plex:1000.00
A549-R1	P29401	S(+229.16)GK(+72.02)PAELLK(+229.16)	597	595	603	63.53	F2:22519	52.9035	S1:TMT10plex:1000.00;K3:Lac:137.66;K9:TMT10plex:1000.00
A549-R1	P00558	L(+229.16)TLDK(+72.02)LDVK(+229.16)	11	7	15	83.7	F12:29246	12.0901	L1:TMT10plex:1000.00;K5:Lac:135.92;K9:TMT10plex:1000.00
A549-R1	P11413	I(+229.16)IVEK(+72.02)PFGR	171	167	175	79.72	F16:29399	88.9707	I1:TMT10plex:1000.00;K5:Lac:1000.00
A549-R1	O60218	K(+229.16)(+72.02)TAAQVLIR	243	243	251	60.9	F1:21988	7.86309	K1:TMT10plex:1000.00;K1:Lac:1000.00
A549-R1	Q9NS87	K(+72.02)(+42.01)TELR	6	6	10	21.61	F22:5938	16.0258	K1:Lac:1000.00;K1:Acetylation (Protein N-term):1000.00
A549-R1	Q9H3K6	F(+229.16)EGK(+72.02)PLLQR	47	44	52	71.48	F13:25950	47.3069	F1:TMT10plex:1000.00;K4:Lac:1000.00
A549-R1	P00352	S(+229.16)LDDVIK(+72.02)R	419	413	420	61.69	F22:21878	29.5913	S1:TMT10plex:1000.00;K7:Lac:1000.00
A549-R1	P62328	K(+229.16)(+72.02)TETQEK(+229.16)NPLPSK(+229.16)ETIEQEK(+229.16)	20	20	39	46.29	F3:14782	4.0603	K1:TMT10plex:1000.00;K1:Lac:1000.00;K7:TMT10plex:1000.00;K13:TMT10plex:1000.00;K20:TMT10plex:1000.00
A549-R1	Q8NBS9	L(+229.16)FK(+72.02)PGQEAVK(+229.16)	143	141	150	73.29	F11:25955	8.45742	L1:TMT10plex:1000.00;K3:Lac:81.00;K10:TMT10plex:1000.00
A549-R1	P06703	E(+229.16)LK(+72.02)ELIQK(+229.16)	35	33	40	77.25	F6:27056	29.3084	E1:TMT10plex:1000.00;K3:Lac:152.29;K8:TMT10plex:1000.00
A549-R1	P33764	E(+229.16)LK(+72.02)ELLQK(+229.16)	35	33	40	77.25	F6:27056	29.3084	E1:TMT10plex:1000.00;K3:Lac:1000.00;K8:TMT10plex:1000.00
A549-R1	P26447	S(+229.16)ELK(+72.02)ELLTR	35	32	40	81.5	F8:29542	15.5444	S1:TMT10plex:1000.00;K4:Lac:1000.00
A549-R1	P35270	G(+229.16)LQELK(+72.02)AK(+229.16)	226	221	228	43.74	F5:14531	25.0233	G1:TMT10plex:1000.00;K6:Lac:30.83;K8:TMT10plex:1000.00
A549-R2	P00352	I(+229.16)AK(+72.02)EEIFGPVQQIMK(+229.16)	398	396	410	99.39	F12:35716	6.38721	I1:TMT10plex:1000.00;K3:Lac:150.01;K15:TMT10plex:1000.00
A549-R2	P50395	F(+229.16)K(+72.02)IPGSPPESMGR	57	56	68	74.84	F7:27908	1.1923	F1:TMT10plex:1000.00;K2:Lac:1000.00
A549-R2	P07195	I(+229.16)VADK(+72.02)DYSVTANSK(+229.16)	82	78	91	64.27	F20:22398	1.86498	I1:TMT10plex:1000.00;K5:Lac:250.15;K14:TMT10plex:1000.00
A549-R2	P61604	V(+229.16)GDK(+72.02)VLLPEYGGTK(+229.16)	70	67	80	77.02	F3:27204	8.14489	V1:TMT10plex:1000.00;K4:Lac:118.06;K14:TMT10plex:1000.00
A549-R2	P00352	I(+229.16)LDLIESGK(+72.02)K(+229.16)	362	354	363	92.94	F24:32376	6.23316	I1:TMT10plex:1000.00;K9:Lac:26.02;K10:TMT10plex:1000.00
A549-R2	P00352	I(+229.16)LDLIESGK(+72.02)K(+229.16)	362	354	363	92.17	F24:32071	2.45676	I1:TMT10plex:1000.00;K9:Lac:21.94;K10:TMT10plex:1000.00
A549-R2	P61081	M(+15.99)(+42.01)IK(+72.02)LFSLK(+229.16)	3	1	8	97.96	F6:35763	33.5427	M1:Oxidation (M):1000.00;M1:Acetylation (Protein N-term):1000.00;K3:Lac:76.17;K8:TMT10plex:1000.00
A549-R2	Q09666	V(+229.16)K(+72.02)GDVDVSLPK(+229.16)	2132	2131	2141	68.67	F8:24431	1.42285	V1:TMT10plex:1000.00;K2:Lac:172.43;K11:TMT10plex:1000.00
A549-R2	Q15942	F(+229.16)GPVVAPK(+72.02)PK(+229.16)	33	26	35	72.61	F10:25870	3.32553	F1:TMT10plex:1000.00;K8:Lac:33.18;K10:TMT10plex:1000.00
A549-R2	P00352	S(+229.16)LDDVIK(+72.02)R	419	413	420	61.27	F2:21630	28.4836	S1:TMT10plex:1000.00;K7:Lac:1000.00
A549-R2	P00352	S(+229.16)LDDVIK(+72.02)R	419	413	420	62.31	F22:22234	29.5963	S1:TMT10plex:1000.00;K7:Lac:1000.00
A549-R2	Q9H3K6	F(+229.16)EGK(+72.02)PLLQR	47	44	52	72.6	F13:26294	39.5388	F1:TMT10plex:1000.00;K4:Lac:1000.00
A549-R2	P60660	V(+229.16)FDK(+72.02)EGNGTVM(+15.99)GAEIR	98	95	110	73.41	F8:26325	11.6157	V1:TMT10plex:1000.00;K4:Lac:1000.00;M11:Oxidation (M):1000.00
A549-R2	P08590	V(+229.16)FDK(+72.02)EGNGTVM(+15.99)GAELR	142	139	154	73.41	F8:26325	11.6157	V1:TMT10plex:1000.00;K4:Lac:1000.00;M11:Oxidation (M):1000.00
A549-R2	P62937	V(+229.16)SFELFADK(+72.02)VPK(+229.16)	28	20	31	95.94	F24:33537	15.1931	V1:TMT10plex:1000.00;K9:Lac:68.31;K12:TMT10plex:1000.00
A549-R2	P26447	S(+229.16)ELK(+72.02)ELLTR	35	32	40	82.47	F8:29916	36.0824	S1:TMT10plex:1000.00;K4:Lac:1000.00
A549-R2	P23381	I(+229.16)DK(+72.02)ELINR	114	112	119	65.15	F22:23374	4.88549	I1:TMT10plex:1000.00;K3:Lac:1000.00
Colon-R1	P61978	D(+229.16)LAGSIIGK(+72.02)GGQR	405	397	409	61.08	F1:21611	22.0942	D1:TMT10plex:1000.00;K9:Lac:1000.00
Colon-R1	Q06830	K(+229.16)(+229.16)QGGLGPMNIPLVSDPK(+72.02)R	109	93	110	82.79	F1:30034	1.67514	K1:TMT10plex:1000.00;K1:TMT10plex:1000.00;K17:Lac:1000.00
Colon-R1	P32119	K(+229.16)(+72.02)EGGLGPLNIPLLADVTRR	92	92	110	102.98	F1:37799	5.00385	K1:TMT10plex:1000.00;K1:Lac:1000.00
Colon-R1	P06733	F(+229.16)TASAGIQVVGDDLTVTNPK(+72.02)R	326	307	327	88.92	F12:33445	15.4557	F1:TMT10plex:1000.00;K20:Lac:1000.00
Colon-R1	P07355	T(+229.16)K(+72.02)GVDEVTIVNILTNR	49	48	63	99.33	F12:37570	5.90347	T1:TMT10plex:1000.00;K2:Lac:1000.00
Colon-R1	Q9UKK9	H(+229.16)ANAK(+72.02)PFEVPFLK(+229.16)F	210	206	219	95.23	F13:33795	1.95987	H1:TMT10plex:1000.00;K5:Lac:89.48;K13:TMT10plex:1000.00
Colon-R1	P16152	T(+229.16)DMAGPK(+72.02)ATK(+229.16)	239	233	242	34.22	F15:11107	36.6485	T1:TMT10plex:1000.00;K7:Lac:38.16;K10:TMT10plex:1000.00
Colon-R1	P48643	M(+229.16)(+15.99)ILK(+72.02)IDDIR	529	526	534	81.09	F15:29752	2.39154	M1:TMT10plex:1000.00;M1:Oxidation (M):1000.00;K4:Lac:1000.00
Colon-R1	P06733	L(+229.16)AK(+72.02)YNQLLR	406	404	412	83.72	F15:30782	1.74746	L1:TMT10plex:1000.00;K3:Lac:1000.00
Colon-R1	P06733	S(+229.16)C(+57.02)NC(+57.02)LLLK(+72.02)VNQIGSVTESLQAC(+57.02)K(+229.16)	343	336	358	88.7	F15:32730	21.4911	S1:TMT10plex:1000.00;C2:Carbamidomethylation:1000.00;C4:Carbamidomethylation:1000.00;K8:Lac:149.42;C22:Carbamidomethylation:1000.00;K23:TMT10plex:1000.00
Colon-R1	P16152	T(+229.16)DM(+15.99)AGPK(+72.02)ATK(+229.16)	239	233	242	24.46	F15:7313	37.2167	T1:TMT10plex:1000.00;M3:Oxidation (M):1000.00;K7:Lac:32.97;K10:TMT10plex:1000.00
Colon-R1	P04406	V(+229.16)PTANVSVVDLTC(+57.02)RLEK(+229.16)PAK(+72.02)YDDIK(+229.16)	254	235	259	85.64	F16:30142	8.75346	V1:TMT10plex:1000.00;C13:Carbamidomethylation:1000.00;K17:TMT10plex:1000.00;K20:Lac:28.36;K25:TMT10plex:1000.00
Colon-R1	Q9H1E3	L(+229.16)K(+229.16)ATVTPSPVK(+72.02)GK(+229.16)	184	174	186	54.44	F18:19000	24.2728	L1:TMT10plex:1000.00;K2:TMT10plex:1000.00;K11:Lac:20.41;K13:TMT10plex:1000.00
Colon-R1	P06733	S(+229.16)C(+57.02)NC(+57.02)LLLK(+72.02)VNQIGSVTESLQAC(+57.02)K(+229.16)	343	336	358	89.13	F18:32774	25.1781	S1:TMT10plex:1000.00;C2:Carbamidomethylation:1000.00;C4:Carbamidomethylation:1000.00;K8:Lac:142.24;C22:Carbamidomethylation:1000.00;K23:TMT10plex:1000.00
Colon-R1	P09211	A(+229.16)LPGQLK(+72.02)PFETLLSQNQGGK(+229.16)	128	122	141	102.84	F18:38196	57.8524	A1:TMT10plex:1000.00;K7:Lac:49.75;K20:TMT10plex:1000.00
Colon-R1	P07737	T(+229.16)FVNITPAEVGVLVGK(+72.02)DR	54	39	56	104.93	F18:39028	8.779	T1:TMT10plex:1000.00;K16:Lac:1000.00
Colon-R1	P06733	K(+229.16)(+229.16)LNVTEQEK(+72.02)IDK(+229.16)	89	81	92	61.28	F19:20202	42.4654	K1:TMT10plex:1000.00;K1:TMT10plex:1000.00;K9:Lac:62.26;K12:TMT10plex:1000.00
Colon-R1	Q14847	K(+229.16)(+72.02)PYC(+57.02)NAHYPK(+229.16)	50	50	59	44.95	F2:14424	0.965704	K1:TMT10plex:1000.00;K1:Lac:1000.00;C4:Carbamidomethylation:1000.00;K10:TMT10plex:1000.00
Colon-R1	Q12931	P(+229.16)RYTLHYK(+72.02)TDAPLNIR	332	325	340	53.64	F2:17914	1.08197	P1:TMT10plex:1000.00;K8:Lac:1000.00
Colon-R1	P14618	T(+229.16)ATESFASDPILYRPVAVALDTK(+72.02)GPEIR	115	93	120	98.63	F2:35145	2.58591	T1:TMT10plex:1000.00;K23:Lac:1000.00
Colon-R1	P29401	V(+229.16)LDPFTIK(+72.02)PLDR	538	531	542	104.7	F2:37522	11.5187	V1:TMT10plex:1000.00;K8:Lac:1000.00
Colon-R1	Q9Y394	I(+229.16)ENFK(+72.02)SGVDADSSYFK(+229.16)	321	317	332	70.17	F20:22465	51.9702	I1:TMT10plex:1000.00;K5:Lac:160.69;K16:TMT10plex:1000.00
Colon-R1	P04406	A(+229.16)ENGK(+72.02)LVINGNPITIFQERDPSK(+229.16)	66	62	84	89.42	F21:32509	18.79	A1:TMT10plex:1000.00;K5:Lac:107.20;K23:TMT10plex:1000.00
Colon-R1	P04075	D(+229.16)GADFAK(+72.02)WR	147	141	149	52.61	F22:16771	8.26367	D1:TMT10plex:1000.00;K7:Lac:1000.00
Colon-R1	P26447	L(+229.16)NK(+72.02)SELK(+229.16)ELLTR	31	29	40	93.82	F22:33086	3.26911	L1:TMT10plex:1000.00;K3:Lac:111.84;K7:TMT10plex:1000.00
Colon-R1	P10809	V(+229.16)GEVIVTK(+72.02)DDAMLLK(+229.16)	352	345	359	103.78	F22:37042	1.53424	V1:TMT10plex:1000.00;K8:Lac:213.20;K15:TMT10plex:1000.00
Colon-R1	P35270	G(+229.16)LQELK(+72.02)AK(+229.16)	226	221	228	50.32	F5:16399	21.9981	G1:TMT10plex:1000.00;K6:Lac:32.28;K8:TMT10plex:1000.00
Colon-R1	Q9Y394	R(+229.16)IENFK(+72.02)SGVDADSSYFK(+229.16)	321	316	332	58.72	F6:18863	2.6548	R1:TMT10plex:1000.00;K6:Lac:106.36;K17:TMT10plex:1000.00
Colon-R1	P06733	S(+229.16)GK(+72.02)YDLDFK(+229.16)SPDDPSR	256	254	269	66.67	F6:22074	8.03188	S1:TMT10plex:1000.00;K3:Lac:102.87;K9:TMT10plex:1000.00
Colon-R1	P38117	L(+229.16)K(+72.02)LPAVVTADLR	176	175	186	105.46	F7:38646	6.06116	L1:TMT10plex:1000.00;K2:Lac:1000.00
Colon-R1	Q9BWD1	K(+229.16)(+72.02)GLIEVK(+229.16)	211	211	217	55.26	F8:18140	1.55806	K1:TMT10plex:1000.00;K1:Lac:1000.00;K7:TMT10plex:1000.00
Colon-R1	Q9Y394	R(+229.16)IENFK(+72.02)SGVDADSSYFK(+229.16)	321	316	332	59.27	F9:18847	2.7347	R1:TMT10plex:1000.00;K6:Lac:132.83;K17:TMT10plex:1000.00
Colon-R1	P06733	S(+229.16)GK(+229.16)YDLDFK(+72.02)SPDDPSR	262	254	269	66.69	F9:21770	17.2898	S1:TMT10plex:1000.00;K3:TMT10plex:1000.00;K9:Lac:103.24
Colon-R1	P06733	S(+229.16)GK(+229.16)YDLDFK(+72.02)SPDDPSR	262	254	269	66.69	F9:21793	16.5834	S1:TMT10plex:1000.00;K3:TMT10plex:1000.00;K9:Lac:103.24
Colon-R2	P06733	F(+229.16)TASAGIQVVGDDLTVTNPK(+72.02)R	326	307	327	89.06	F13:33367	11.2906	F1:TMT10plex:1000.00;K20:Lac:1000.00
Colon-R2	P06733	Y(+229.16)GK(+72.02)DATNVGDEGGFAPNILENK(+229.16)EGLELLK(+229.16)	202	200	228	94.4	F3:32618	7.14363	Y1:TMT10plex:1000.00;K3:Lac:144.67;K22:TMT10plex:1000.00;K29:TMT10plex:1000.00
Colon-R2	P04406	A(+229.16)ENGK(+72.02)LVINGNPITIFQERDPSK(+229.16)	66	62	84	88.82	F22:32351	27.6313	A1:TMT10plex:1000.00;K5:Lac:109.20;K23:TMT10plex:1000.00
Colon-R2	P06733	S(+229.16)C(+57.02)NC(+57.02)LLLK(+72.02)VNQIGSVTESLQAC(+57.02)K(+229.16)	343	336	358	88.39	F16:32884	23.444	S1:TMT10plex:1000.00;C2:Carbamidomethylation:1000.00;C4:Carbamidomethylation:1000.00;K8:Lac:157.56;C22:Carbamidomethylation:1000.00;K23:TMT10plex:1000.00
Colon-R2	P06733	S(+229.16)C(+57.02)NC(+57.02)LLLK(+72.02)VNQIGSVTESLQAC(+57.02)K(+229.16)	343	336	358	89.36	F19:32370	23.9017	S1:TMT10plex:1000.00;C2:Carbamidomethylation:1000.00;C4:Carbamidomethylation:1000.00;K8:Lac:149.42;C22:Carbamidomethylation:1000.00;K23:TMT10plex:1000.00
Colon-R2	P06733	S(+229.16)C(+57.02)NC(+57.02)LLLK(+72.02)VNQIGSVTESLQAC(+57.02)K(+229.16)	343	336	358	88.72	F19:32118	25.9859	S1:TMT10plex:1000.00;C2:Carbamidomethylation:1000.00;C4:Carbamidomethylation:1000.00;K8:Lac:157.56;C22:Carbamidomethylation:1000.00;K23:TMT10plex:1000.00
Colon-R2	Q99497	A(+229.16)GIK(+72.02)VTVAGLAGK(+229.16)DPVQC(+57.02)SR	32	29	48	83.24	F4:30400	0.603971	A1:TMT10plex:1000.00;K4:Lac:150.65;K13:TMT10plex:1000.00;C18:Carbamidomethylation:1000.00
Colon-R2	Q9Y394	I(+229.16)ENFK(+72.02)SGVDADSSYFK(+229.16)	321	317	332	69.89	F21:21994	45.4679	I1:TMT10plex:1000.00;K5:Lac:182.31;K16:TMT10plex:1000.00
Colon-R2	Q9Y394	I(+229.16)ENFK(+72.02)SGVDADSSYFK(+229.16)	321	317	332	69.89	F21:22239	22.5665	I1:TMT10plex:1000.00;K5:Lac:97.58;K16:TMT10plex:1000.00
Colon-R2	P14618	T(+229.16)ATESFASDPILYRPVAVALDTK(+72.02)GPEIR	115	93	120	98.39	F2:34398	3.10903	T1:TMT10plex:1000.00;K23:Lac:1000.00
Colon-R2	P06733	A(+229.16)AVPSGASTGIYEALELRDNDK(+72.02)TR	54	33	56	76.65	F5:26641	3.3638	A1:TMT10plex:1000.00;K22:Lac:1000.00
Colon-R2	P06733	A(+229.16)AVPSGASTGIYEALELRDNDK(+72.02)TR	54	33	56	76.98	F2:25960	4.45667	A1:TMT10plex:1000.00;K22:Lac:1000.00
Colon-R2	Q9UKK9	H(+229.16)ANAK(+229.16)PFEVPFLK(+72.02)F	218	206	219	88.47	F14:30987	5.13092	H1:TMT10plex:1000.00;K5:TMT10plex:1000.00;K13:Lac:107.29
Colon-R2	Q9UKK9	H(+229.16)ANAK(+229.16)PFEVPFLK(+72.02)F	218	206	219	88.72	F17:30948	5.07002	H1:TMT10plex:1000.00;K5:TMT10plex:1000.00;K13:Lac:93.17
Colon-R2	P02768	K(+229.16)(+72.02)VPQVSTPTLVEVSR	438	438	452	77.79	F1:27923	2.4742	K1:TMT10plex:1000.00;K1:Lac:1000.00
Colon-R2	P08195	L(+229.16)K(+72.02)LEPHEGLLLR	615	614	625	82.6	F22:29904	1.74616	L1:TMT10plex:1000.00;K2:Lac:1000.00
Colon-R2	Q9Y394	R(+229.16)IENFK(+72.02)SGVDADSSYFK(+229.16)	321	316	332	58.12	F6:18260	3.37354	R1:TMT10plex:1000.00;K6:Lac:141.98;K17:TMT10plex:1000.00
Colon-R2	Q9Y394	R(+229.16)IENFK(+72.02)SGVDADSSYFK(+229.16)	321	316	332	58.31	F9:18039	3.23765	R1:TMT10plex:1000.00;K6:Lac:118.56;K17:TMT10plex:1000.00
Colon-R2	P06576	V(+229.16)LDSGAPIK(+72.02)IPVGPETLGR	133	125	143	96.26	F13:36248	10.0318	V1:TMT10plex:1000.00;K9:Lac:1000.00
Colon-R2	P61978	D(+229.16)LAGSIIGK(+72.02)GGQR	405	397	409	60.79	F1:21415	22.051	D1:TMT10plex:1000.00;K9:Lac:1000.00
Colon-R2	P06733	S(+229.16)GK(+72.02)YDLDFK(+229.16)SPDDPSR	256	254	269	66.08	F9:21111	8.59685	S1:TMT10plex:1000.00;K3:Lac:90.95;K9:TMT10plex:1000.00
Colon-R2	Q14847	K(+229.16)(+72.02)TQDQISNIK(+229.16)YHEEFEK(+229.16)	112	112	128	53.88	F15:16129	2.86135	K1:TMT10plex:1000.00;K1:Lac:1000.00;K10:TMT10plex:1000.00;K17:TMT10plex:1000.00
Colon-R2	Q06830	K(+229.16)(+229.16)QGGLGPMNIPLVSDPK(+72.02)R	109	93	110	82.31	F1:29789	2.90096	K1:TMT10plex:1000.00;K1:TMT10plex:1000.00;K17:Lac:1000.00
Colon-R2	P06733	K(+229.16)(+72.02)LNVTEQEK(+229.16)IDK(+229.16)	81	81	92	60.84	F20:19469	2.02951	K1:TMT10plex:1000.00;K1:Lac:1000.00;K9:TMT10plex:1000.00;K12:TMT10plex:1000.00
Colon-R2	P04075	D(+229.16)GADFAK(+72.02)WR	147	141	149	51.99	F23:15912	8.39222	D1:TMT10plex:1000.00;K7:Lac:1000.00
Colon-R2	P04075	D(+229.16)GADFAK(+72.02)WR	147	141	149	57.34	F14:18584	55.4738	D1:TMT10plex:1000.00;K7:Lac:1000.00
Colon-R2	P04075	K(+229.16)(+229.16)DGADFAK(+72.02)WR	147	140	149	52.64	F14:16688	37.5322	K1:TMT10plex:1000.00;K1:TMT10plex:1000.00;K8:Lac:1000.00
Colon-R2	P04075	K(+229.16)(+229.16)DGADFAK(+72.02)WR	147	140	149	48.08	F20:14521	5.89812	K1:TMT10plex:1000.00;K1:TMT10plex:1000.00;K8:Lac:1000.00
Colon-R2	P38117	L(+229.16)K(+72.02)LPAVVTADLR	176	175	186	105.82	F7:38450	4.28394	L1:TMT10plex:1000.00;K2:Lac:1000.00
Colon-R2	Q9UD71	K(+229.16)(+72.02)IQFSVPAPPSQLDPR	8	8	23	87.69	F1:31877	1.54642	K1:TMT10plex:1000.00;K1:Lac:1000.00
Colon-R2	P04406	L(+229.16)EK(+72.02)PAK(+229.16)YDDIK(+229.16)	251	249	259	65.72	F12:20978	8.34974	L1:TMT10plex:1000.00;K3:Lac:62.26;K6:TMT10plex:1000.00;K11:TMT10plex:1000.00
Colon-R2	P16152	T(+229.16)DMAGPK(+72.02)ATK(+229.16)	239	233	242	33.6	F19:10297	33.0445	T1:TMT10plex:1000.00;K7:Lac:32.97;K10:TMT10plex:1000.00
Colon-R2	P00558	I(+229.16)K(+72.02)AAVPSIK(+229.16)	41	40	48	81.32	F4:29600	0.796801	I1:TMT10plex:1000.00;K2:Lac:158.80;K9:TMT10plex:1000.00
Colon-R2	Q58FF7	E(+229.16)K(+72.02)FENLC(+57.02)K(+229.16)	432	431	438	57.44	F14:18678	3.54294	E1:TMT10plex:1000.00;K2:Lac:167.75;C7:Carbamidomethylation:1000.00;K8:TMT10plex:1000.00
Colon-R2	P48735	L(+229.16)VPGWTK(+72.02)PITIGR	166	160	172	99.06	F13:37306	7.65161	L1:TMT10plex:1000.00;K7:Lac:1000.00
Colon-R2	P30086	F(+229.16)K(+72.02)VASFR	150	149	155	78.24	F16:28620	4.24633	F1:TMT10plex:1000.00;K2:Lac:1000.00
Colon-R2	Q9BWD1	K(+229.16)(+72.02)GLIEVK(+229.16)	211	211	217	54.8	F8:17770	2.53465	K1:TMT10plex:1000.00;K1:Lac:1000.00;K7:TMT10plex:1000.00
Colon-R2	Q9NTJ3	M(+229.16)VEK(+72.02)EK(+229.16)DALEGEK(+229.16)	293	290	302	68.07	F21:21328	3.62724	M1:TMT10plex:1000.00;K4:Lac:22.85;K6:TMT10plex:1000.00;K13:TMT10plex:1000.00
Lung fibro-R1	P09382	F(+229.16)NAHGDANTIVC(+57.02)NSK(+72.02)DGGAWGTEQR	64	50	74	62.5	F8:31852	14.9156	F1:TMT10plex:1000.00;C12:Carbamidomethylation:1000.00;K15:Lac:1000.00
Lung fibro-R1	P04406	V(+229.16)IISAPSADAPMFVMGVNHEK(+72.02)YDNSLK(+229.16)	139	119	145	92.46	F3:49542	8.14038	V1:TMT10plex:1000.00;K21:Lac:72.73;K27:TMT10plex:1000.00
Lung fibro-R1	Q09666	I(+229.16)SMPDFDLHLK(+72.02)GPK(+229.16)	2589	2579	2592	91.1	F23:48367	17.3296	I1:TMT10plex:1000.00;K11:Lac:38.16;K14:TMT10plex:1000.00
Lung fibro-R1	P31949	Y(+229.16)AGK(+72.02)DGYNYTLSK(+229.16)	27	24	36	64.25	F12:30320	1.11808	Y1:TMT10plex:1000.00;K4:Lac:162.16;K13:TMT10plex:1000.00
Lung fibro-R1	Q05682	S(+229.16)AK(+229.16)PTK(+72.02)PAASDLPVPAEGVR	696	691	710	64.63	F7:35235	40.6596	S1:TMT10plex:1000.00;K3:TMT10plex:1000.00;K6:Lac:28.36
Lung fibro-R1	P04083	D(+229.16)LAK(+72.02)DITSDTSGDFR	166	163	177	77.09	F17:40145	1.16045	D1:TMT10plex:1000.00;K4:Lac:1000.00
Lung fibro-R1	P62937	S(+229.16)IYGEK(+72.02)FEDENFILK(+229.16)	82	77	91	91.86	F9:48463	1.60894	S1:TMT10plex:1000.00;K6:Lac:246.46;K15:TMT10plex:1000.00
Lung fibro-R1	Q09666	I(+229.16)PMPDFDLHLK(+72.02)GPK(+229.16)	2973	2963	2976	95.54	F23:51198	17.2483	I1:TMT10plex:1000.00;K11:Lac:38.16;K14:TMT10plex:1000.00
Lung fibro-R1	P67936	E(+229.16)K(+72.02)AEGDVAALNR	44	43	54	52.8	F5:25927	5.76973	E1:TMT10plex:1000.00;K2:Lac:1000.00
Lung fibro-R1	Q09666	I(+229.16)SMPDIDLNLK(+72.02)GPK(+229.16)	2717	2707	2720	98.66	F11:53956	22.2368	I1:TMT10plex:1000.00;K11:Lac:56.34;K14:TMT10plex:1000.00
Lung fibro-R1	P26447	L(+229.16)NK(+72.02)SELK(+229.16)ELLTR	31	29	40	91.58	F6:48597	2.98306	L1:TMT10plex:1000.00;K3:Lac:72.09;K7:TMT10plex:1000.00
Lung fibro-R1	P11021	M(+229.16)K(+72.02)ETAEAYLGK(+229.16)	154	153	163	75.52	F23:38765	5.81118	M1:TMT10plex:1000.00;K2:Lac:202.16;K11:TMT10plex:1000.00
Lung fibro-R1	P09382	N(+229.16)LNLK(+72.02)PGEC(+57.02)LR	13	9	19	67.85	F22:35982	49.5206	N1:TMT10plex:1000.00;K5:Lac:1000.00;C9:Carbamidomethylation:1000.00
Lung fibro-R1	P09382	N(+229.16)LNLK(+72.02)PGEC(+57.02)LR	13	9	19	68.02	F19:38228	46.6352	N1:TMT10plex:1000.00;K5:Lac:1000.00;C9:Carbamidomethylation:1000.00
Lung fibro-R1	P04075	G(+229.16)ILAADESTGSIAK(+72.02)R	42	29	43	65.14	F16:37288	34.885	G1:TMT10plex:1000.00;K14:Lac:1000.00
Lung fibro-R1	P26038	Y(+229.16)GDFNK(+72.02)EVHK(+229.16)	139	134	143	57.83	F15:26094	51.4668	Y1:TMT10plex:1000.00;K6:Lac:39.13;K10:TMT10plex:1000.00
Lung fibro-R1	P16152	T(+229.16)DMAGPK(+72.02)ATK(+229.16)SPEEGAETPVYLA	239	233	255	62.63	F23:30544	2.30261	T1:TMT10plex:1000.00;K7:Lac:22.45;K10:TMT10plex:1000.00
Lung fibro-R1	P07900	I(+229.16)MK(+72.02)DILEK(+229.16)	576	574	581	95.98	F6:51385	5.05021	I1:TMT10plex:1000.00;K3:Lac:152.29;K8:TMT10plex:1000.00
Lung fibro-R1	Q8WVM8	Y(+229.16)FDPK(+72.02)MLR	572	568	575	53.29	F12:23374	0.574607	Y1:TMT10plex:1000.00;K5:Lac:1000.00
Lung fibro-R1	P06733	K(+229.16)(+72.02)LNVTEQEK(+229.16)IDK(+229.16)	81	81	92	60.22	F20:29142	4.49898	K1:TMT10plex:1000.00;K1:Lac:1000.00;K9:TMT10plex:1000.00;K12:TMT10plex:1000.00
Lung fibro-R1	P08133	E(+229.16)FIEK(+72.02)YDK(+229.16)	644	640	647	75.93	F21:36537	1.0562	E1:TMT10plex:1000.00;K5:Lac:120.00;K8:TMT10plex:1000.00
Lung fibro-R1	Q99832	Q(+229.16)VK(+72.02)PYVEEGLHPQIIIR	109	107	123	76.54	F19:43736	8.64513	Q1:TMT10plex:1000.00;K3:Lac:1000.00
Lung fibro-R2	P31949	Y(+229.16)AGK(+72.02)DGYNYTLSK(+229.16)	27	24	36	85.33	F15:39631	19.2856	Y1:TMT10plex:1000.00;K4:Lac:202.16;K13:TMT10plex:1000.00
Lung fibro-R2	P68104	G(+229.16)ITIDISLWK(+72.02)FETSK(+229.16)	79	70	84	111.57	F11:58753	0.537515	G1:TMT10plex:1000.00;K10:Lac:52.68;K15:TMT10plex:1000.00
Lung fibro-R2	P07237	L(+229.16)K(+72.02)AEGSEIR	71	70	78	77.16	F19:38645	1.99825	L1:TMT10plex:1000.00;K2:Lac:1000.00
Lung fibro-R2	Q09666	F(+229.16)SMPGFK(+72.02)GEGPDGDVK(+229.16)LPK(+229.16)	2652	2646	2664	108.42	F3:56842	7.07255	F1:TMT10plex:1000.00;K7:Lac:94.67;K16:TMT10plex:1000.00;K19:TMT10plex:1000.00
HL60-R1	Q12906	V(+229.16)GLVAK(+72.02)GLLLK(+229.16)	100	95	105	98.27	F8:31530	69.5947	V1:TMT10plex:1000.00;K6:Lac:77.53;K11:TMT10plex:1000.00
HL60-R2	Q9Y394	I(+229.16)ENFK(+72.02)SGVDADSSYFK(+229.16)	321	317	332	78	F10:23607	68.2544	I1:TMT10plex:1000.00;K5:Lac:170.43;K16:TMT10plex:1000.00
HL60-R2	Q9Y394	R(+229.16)IENFK(+72.02)SGVDADSSYFK(+229.16)	321	316	332	67.16	F11:19568	4.99953	R1:TMT10plex:1000.00;K6:Lac:128.75;K17:TMT10plex:1000.00
HL60-R2	P16152	T(+229.16)DM(+15.99)AGPK(+72.02)ATK(+229.16)	239	233	242	35.34	F3:7351	32.4222	T1:TMT10plex:1000.00;M3:Oxidation (M):1000.00;K7:Lac:32.97;K10:TMT10plex:1000.00
HL60-R2	Q01105	S(+229.16)SQTQNK(+72.02)ASR	189	183	192	24.07	F4:3247	7.39764	S1:TMT10plex:1000.00;K7:Lac:1000.00
U937-R1	P09429	G(+229.16)VVK(+72.02)AEK(+229.16)	177	174	180	50.48	F13:13521	15.0563	G1:TMT10plex:1000.00;K4:Lac:101.94;K7:TMT10plex:1000.00
U937-R1	Q12905	K(+229.16)(+72.02)LDPELHLDIK(+229.16)	186	186	196	92.46	F13:29296	1.76932	K1:TMT10plex:1000.00;K1:Lac:1000.00;K11:TMT10plex:1000.00
U937-R1	P27797	R(+229.16)K(+72.02)EEEEAEDK(+229.16)	377	376	385	42.85	F14:10557	7.287	R1:TMT10plex:1000.00;K2:Lac:138.39;K10:TMT10plex:1000.00
U937-R1	P61978	V(+229.16)VLIGGK(+72.02)PDR	198	192	201	85.38	F5:26118	32.3544	V1:TMT10plex:1000.00;K7:Lac:1000.00
U937-R1	P07195	L(+229.16)K(+72.02)DDEVAQLK(+229.16)	310	309	318	85.64	F8:26700	2.60312	L1:TMT10plex:1000.00;K2:Lac:239.52;K10:TMT10plex:1000.00
U937-R1	P68104	K(+229.16)(+72.02)LEDGPK(+229.16)	386	386	392	63.64	F9:18739	38.7484	K1:TMT10plex:1000.00;K1:Lac:1000.00;K7:TMT10plex:1000.00
U937-R1	P07195	L(+229.16)K(+72.02)DDEVAQLK(+229.16)	310	309	318	83.92	F9:26308	22.9777	L1:TMT10plex:1000.00;K2:Lac:131.15;K10:TMT10plex:1000.00
U937-R2	P09429	G(+229.16)VVK(+72.02)AEK(+229.16)	177	174	180	50.73	F1:13582	15.6809	G1:TMT10plex:1000.00;K4:Lac:101.94;K7:TMT10plex:1000.00
U937-R2	P68104	S(+229.16)AQK(+72.02)AQK(+229.16)	457	454	460	34	F1:7382	22.6616	S1:TMT10plex:1000.00;K4:Lac:83.88;K7:TMT10plex:1000.00
U937-R2	Q8WVM8	Y(+229.16)FDPK(+72.02)MLR	572	568	575	66.73	F10:18971	0.864228	Y1:TMT10plex:1000.00;K5:Lac:1000.00
U937-R2	Q9Y394	I(+229.16)ENFK(+72.02)SGVDADSSYFK(+229.16)	321	317	332	80.53	F10:24237	55.9073	I1:TMT10plex:1000.00;K5:Lac:69.97;K16:TMT10plex:1000.00
U937-R2	Q9UKK9	P(+229.16)K(+72.02)PGDGEFVEVISLPK(+229.16)	161	160	175	104.6	F15:33324	0.473558	P1:TMT10plex:1000.00;K2:Lac:251.14;K16:TMT10plex:1000.00
U937-R2	P78527	K(+229.16)(+72.02)QNNFSLAMK(+229.16)	3248	3248	3257	80.53	F7:24203	15.0984	K1:TMT10plex:1000.00;K1:Lac:1000.00;K10:TMT10plex:1000.00
U937-R2	P42704	N(+229.16)VQGIIEILK(+72.02)GM	463	454	465	111.51	F8:34954	18.5306	N1:TMT10plex:1000.00;K10:Lac:1000.00
U937-R2	Q8WVM8	Y(+229.16)FDPK(+72.02)MLR	572	568	575	66.45	F9:19148	3.36499	Y1:TMT10plex:1000.00;K5:Lac:1000.00
HaCaT-R1	P30044	K(+229.16)(+72.02)GVLFGVPGAFTPGC(+57.02)SK(+229.16)	86	86	102	115.22	F9:24371	12.9938	K1:TMT10plex:1000.00;K1:Lac:1000.00;C15:Carbamidomethylation:1000.00;K17:TMT10plex:1000.00
HaCaT-R1	P60174	K(+229.16)(+72.02)QSLGELIGTLNAAK(+229.16)	56	56	70	117.97	F5:25136	29.2891	K1:TMT10plex:1000.00;K1:Lac:1000.00;K15:TMT10plex:1000.00
HaCaT-R1	P31947	G(+229.16)AVEK(+72.02)GEELSC(+57.02)EER	32	28	41	72.89	F9:14582	53.4888	G1:TMT10plex:1000.00;K5:Lac:1000.00;C11:Carbamidomethylation:1000.00
HaCaT-R1	P31947	G(+229.16)AVEK(+72.02)GEELSC(+57.02)EER	32	28	41	73.12	F10:15120	48.791	G1:TMT10plex:1000.00;K5:Lac:1000.00;C11:Carbamidomethylation:1000.00
HaCaT-R1	P06733	D(+229.16)ATNVGDEGGFAPNILENK(+72.02)EGLELLK(+229.16)	221	203	228	109.12	F14:25938	24.2226	D1:TMT10plex:1000.00;K19:Lac:83.89;K26:TMT10plex:1000.00
HaCaT-R1	P35579	K(+229.16)(+72.02)QELEEIC(+57.02)HDLEAR	910	910	923	98.49	F12:22322	19.1085	K1:TMT10plex:1000.00;K1:Lac:1000.00;C8:Carbamidomethylation:1000.00
HaCaT-R1	P62937	T(+229.16)EWLDGK(+72.02)HVVFGK(+229.16)	125	119	131	102.8	F1:26987	92.1475	T1:TMT10plex:1000.00;K7:Lac:90.57;K13:TMT10plex:1000.00
HaCaT-R1	P10599	M(+229.16)IK(+72.02)PFFHSLSEK(+229.16)	39	37	48	107.18	F6:22636	44.188	M1:TMT10plex:1000.00;K3:Lac:123.34;K12:TMT10plex:1000.00
HaCaT-R1	P49902	K(+229.16)(+72.02)PLFFGEGTVLR	292	292	303	115.18	F4:26000	5.99356	K1:TMT10plex:1000.00;K1:Lac:1000.00
HaCaT-R1	P04075	A(+229.16)AQEEYVK(+72.02)R	330	323	331	61.38	F11:11832	43.1537	A1:TMT10plex:1000.00;K8:Lac:1000.00
HaCaT-R1	P10599	M(+229.16)(+15.99)IK(+72.02)PFFHSLSEK(+229.16)	39	37	48	98.16	F6:20447	53.4769	M1:TMT10plex:1000.00;M1:Oxidation (M):1000.00;K3:Lac:85.33;K12:TMT10plex:1000.00
HaCaT-R1	P10599	M(+229.16)(+15.99)IK(+72.02)PFFHSLSEK(+229.16)	39	37	48	98.16	F6:20424	55.9373	M1:TMT10plex:1000.00;M1:Oxidation (M):1000.00;K3:Lac:123.34;K12:TMT10plex:1000.00
HaCaT-R1	P31949	N(+229.16)QK(+72.02)DPGVLDR	55	53	62	68.57	F14:15062	5.48903	N1:TMT10plex:1000.00;K3:Lac:1000.00
HaCaT-R1	P14618	K(+229.16)(+72.02)ASDVHEVR	247	247	255	49.91	F14:9450	21.5678	K1:TMT10plex:1000.00;K1:Lac:1000.00
HaCaT-R1	Q6YN16	K(+229.16)(+72.02)VESTGAVPEFK(+229.16)EEK(+229.16)	284	284	298	67.76	F15:14565	0.72934	K1:TMT10plex:1000.00;K1:Lac:1000.00;K12:TMT10plex:1000.00;K15:TMT10plex:1000.00
HaCaT-R1	P29034	Y(+229.16)SC(+57.02)QEGDK(+72.02)FK(+229.16)	27	20	29	75.32	F16:17490	5.4909	Y1:TMT10plex:1000.00;C3:Carbamidomethylation:1000.00;K8:Lac:33.91;K10:TMT10plex:1000.00
HaCaT-R1	P54652	Y(+229.16)K(+72.02)SEDEANRDR	529	528	538	46.9	F9:7856	4.42722	Y1:TMT10plex:1000.00;K2:Lac:1000.00
HaCaT-R1	P00918	V(+229.16)GSAK(+72.02)PGLQK(+229.16)	153	149	158	79.19	F2:16843	27.1	V1:TMT10plex:1000.00;K5:Lac:105.53;K10:TMT10plex:1000.00
HaCaT-R1	P04075	D(+229.16)GADFAK(+72.02)WR	147	141	149	74.14	F16:17103	63.2573	D1:TMT10plex:1000.00;K7:Lac:1000.00
HaCaT-R1	P16152	T(+229.16)DM(+15.99)AGPK(+72.02)ATK(+229.16)	239	233	242	42.74	F13:7006	13.7907	T1:TMT10plex:1000.00;M3:Oxidation (M):1000.00;K7:Lac:32.97;K10:TMT10plex:1000.00
HaCaT-R1	P16152	T(+229.16)DM(+15.99)AGPK(+72.02)ATK(+229.16)	239	233	242	42.74	F13:7038	42.1838	T1:TMT10plex:1000.00;M3:Oxidation (M):1000.00;K7:Lac:32.97;K10:TMT10plex:1000.00
HaCaT-R1	P16152	T(+229.16)DM(+15.99)AGPK(+72.02)ATK(+229.16)	239	233	242	42.57	F14:7416	12.3836	T1:TMT10plex:1000.00;M3:Oxidation (M):1000.00;K7:Lac:49.37;K10:TMT10plex:1000.00
HaCaT-R1	P61604	K(+229.16)(+72.02)FLPLFDR	8	8	15	119.07	F5:25397	2.63287	K1:TMT10plex:1000.00;K1:Lac:1000.00
HaCaT-R1	P61604	K(+229.16)(+72.02)FLPLFDR	8	8	15	118.28	F6:25140	39.153	K1:TMT10plex:1000.00;K1:Lac:1000.00
HaCaT-R1	P27348	E(+229.16)K(+72.02)VESELR	85	84	91	71.46	F11:14494	5.02966	E1:TMT10plex:1000.00;K2:Lac:1000.00
HaCaT-R1	Q13049	V(+229.16)K(+72.02)EAAEER	139	138	145	57.85	F11:11018	6.23218	V1:TMT10plex:1000.00;K2:Lac:1000.00
HaCaT-R1	P00367	G(+229.16)ASIVEDK(+72.02)LVEDLR	84	77	90	117.03	F14:27551	1.93076	G1:TMT10plex:1000.00;K8:Lac:1000.00
HaCaT-R1	Q01105	E(+229.16)QQEAIEHIDEVQNEIDRLNEQASEEILK(+72.02)VEQK(+229.16)	68	40	72	119.1	F12:26583	48.0264	E1:TMT10plex:1000.00;K29:Lac:25.11;K33:TMT10plex:1000.00
HaCaT-R1	P10809	K(+229.16)(+72.02)GVITVK(+229.16)	196	196	202	84.96	F4:17743	73.6998	K1:TMT10plex:1000.00;K1:Lac:1000.00;K7:TMT10plex:1000.00
HaCaT-R2	P14618	A(+229.16)GK(+72.02)PVIC(+57.02)ATQM(+15.99)LESM(+15.99)IK(+229.16)	322	320	336	93.26	F11:29295	10.1456	A1:TMT10plex:1000.00;K3:Lac:71.53;C7:Carbamidomethylation:1000.00;M11:Oxidation (M):1000.00;M15:Oxidation (M):1000.00;K17:TMT10plex:1000.00
HaCaT-R2	P09211	A(+229.16)LPGQLK(+72.02)PFETLLSQNQGGK(+229.16)	128	122	141	105.84	F7:33713	61.9413	A1:TMT10plex:1000.00;K7:Lac:131.11;K20:TMT10plex:1000.00
HaCaT-R2	P06733	D(+229.16)ATNVGDEGGFAPNILENK(+72.02)EGLELLK(+229.16)	221	203	228	106.72	F11:34185	20.689	D1:TMT10plex:1000.00;K19:Lac:71.72;K26:TMT10plex:1000.00
HaCaT-R2	Q58FF7	E(+229.16)K(+72.02)FENLC(+57.02)K(+229.16)	432	431	438	67.7	F13:19609	2.03277	E1:TMT10plex:1000.00;K2:Lac:182.75;C7:Carbamidomethylation:1000.00;K8:TMT10plex:1000.00
HaCaT-R2	P15311	F(+229.16)GDYNK(+72.02)EVHK(+229.16)	139	134	143	68.87	F14:20164	1.09402	F1:TMT10plex:1000.00;K6:Lac:64.94;K10:TMT10plex:1000.00
HaCaT-R2	P00367	G(+229.16)ASIVEDK(+72.02)LVEDLR	84	77	90	102.1	F6:32546	24.1463	G1:TMT10plex:1000.00;K8:Lac:1000.00
HaCaT-R2	P35270	G(+229.16)LQELK(+72.02)AK(+229.16)	226	221	228	60.2	F14:16908	26.7408	G1:TMT10plex:1000.00;K6:Lac:60.92;K8:TMT10plex:1000.00
HaCaT-R2	P14618	G(+229.16)SGTAEVELK(+72.02)K(+229.16)	135	126	136	68.48	F10:20252	24.6465	G1:TMT10plex:1000.00;K10:Lac:21.94;K11:TMT10plex:1000.00
HaCaT-R2	P14618	G(+229.16)VNLPGAAVDLPAVSEK(+72.02)DIQDLK(+229.16)	224	208	230	101.38	F15:32336	19.7104	G1:TMT10plex:1000.00;K17:Lac:62.39;K23:TMT10plex:1000.00
HaCaT-R2	P14618	G(+229.16)VNLPGAAVDLPAVSEK(+72.02)DIQDLK(+229.16)	224	208	230	101.29	F15:32333	18.0674	G1:TMT10plex:1000.00;K17:Lac:49.54;K23:TMT10plex:1000.00
HaCaT-R2	P14618	G(+229.16)VNLPGAAVDLPAVSEK(+72.02)DIQDLK(+229.16)	224	208	230	101.38	F15:32305	12.047	G1:TMT10plex:1000.00;K17:Lac:55.13;K23:TMT10plex:1000.00
HaCaT-R2	P07900	I(+229.16)K(+72.02)EIVK(+229.16)K(+229.16)	204	203	209	78.03	F9:23845	4.25156	I1:TMT10plex:1000.00;K2:Lac:135.92;K6:TMT10plex:1000.00;K7:TMT10plex:1000.00
HaCaT-R2	P62937	K(+229.16)(+72.02)ITIADC(+57.02)GQLE	155	155	165	86.8	F11:26875	12.0341	K1:TMT10plex:1000.00;K1:Lac:1000.00;C7:Carbamidomethylation:1000.00
HaCaT-R2	P68104	K(+229.16)(+72.02)LEDGPK(+229.16)	386	386	392	61.81	F11:17617	0.561384	K1:TMT10plex:1000.00;K1:Lac:1000.00;K7:TMT10plex:1000.00
HaCaT-R2	P60174	K(+229.16)(+72.02)QSLGELIGTLNAAK(+229.16)	56	56	70	104.53	F13:33154	1.18668	K1:TMT10plex:1000.00;K1:Lac:1000.00;K15:TMT10plex:1000.00
HaCaT-R2	Q13017	L(+229.16)K(+72.02)EIVK(+229.16)K(+229.16)	1371	1370	1376	78.03	F9:23845	4.25156	L1:TMT10plex:1000.00;K2:Lac:1000.00;K6:TMT10plex:1000.00;K7:TMT10plex:1000.00
HaCaT-R2	P06733	S(+229.16)GK(+72.02)YDLDFK(+229.16)SPDDPSR	256	254	269	74.85	F12:22426	6.89807	S1:TMT10plex:1000.00;K3:Lac:47.38;K9:TMT10plex:1000.00
HaCaT-R2	P62937	S(+229.16)IYGEK(+72.02)FEDENFILK(+229.16)	82	77	91	100.68	F13:31771	55.9341	S1:TMT10plex:1000.00;K6:Lac:305.81;K15:TMT10plex:1000.00
HaCaT-R2	P07737	T(+229.16)DK(+72.02)TLVLLM(+15.99)GK(+229.16)	108	106	116	94.21	F9:29609	5.31766	T1:TMT10plex:1000.00;K3:Lac:84.61;M9:Oxidation (M):1000.00;K11:TMT10plex:1000.00
HaCaT-R2	P16152	T(+229.16)DM(+15.99)AGPK(+72.02)ATK(+229.16)	239	233	242	38.36	F8:8953	30.2478	T1:TMT10plex:1000.00;M3:Oxidation (M):1000.00;K7:Lac:57.45;K10:TMT10plex:1000.00
HaCaT-R2	P16152	T(+229.16)DM(+15.99)AGPK(+72.02)ATK(+229.16)	239	233	242	39	F4:9121	32.7321	T1:TMT10plex:1000.00;M3:Oxidation (M):1000.00;K7:Lac:47.09;K10:TMT10plex:1000.00
HaCaT-R2	P16152	T(+229.16)DM(+15.99)AGPK(+72.02)ATK(+229.16)	239	233	242	38.49	F8:8968	4.2362	T1:TMT10plex:1000.00;M3:Oxidation (M):1000.00;K7:Lac:53.53;K10:TMT10plex:1000.00
HaCaT-R2	P16152	T(+229.16)DM(+15.99)AGPK(+72.02)ATK(+229.16)	239	233	242	38.96	F4:9138	5.25865	T1:TMT10plex:1000.00;M3:Oxidation (M):1000.00;K7:Lac:57.45;K10:TMT10plex:1000.00
HaCaT-R2	P16152	T(+229.16)DM(+15.99)AGPK(+72.02)ATK(+229.16)	239	233	242	39.12	F8:9242	35.6823	T1:TMT10plex:1000.00;M3:Oxidation (M):1000.00;K7:Lac:38.16;K10:TMT10plex:1000.00
HaCaT-R2	P16152	T(+229.16)DMAGPK(+72.02)ATK(+229.16)	239	233	242	45.98	F8:11837	6.60681	T1:TMT10plex:1000.00;K7:Lac:91.37;K10:TMT10plex:1000.00
HaCaT-R2	P16152	T(+229.16)DMAGPK(+72.02)ATK(+229.16)	239	233	242	45.98	F8:11813	34.878	T1:TMT10plex:1000.00;K7:Lac:56.34;K10:TMT10plex:1000.00
HaCaT-R2	P68104	V(+229.16)ETGVLK(+72.02)PGM(+15.99)VVTFAPVNVTTEVK(+229.16)	273	267	290	100.36	F2:31881	19.9074	V1:TMT10plex:1000.00;K7:Lac:223.59;M10:Oxidation (M):1000.00;K24:TMT10plex:1000.00
HaCaT-R2	P62937	V(+229.16)K(+72.02)EGMNIVEAMER	133	132	144	93.33	F13:29098	27.0632	V1:TMT10plex:1000.00;K2:Lac:1000.00
HaCaT-R2	P04083	V(+229.16)LDLELK(+72.02)GDIEK(+229.16)	257	251	262	100.23	F15:31984	14.0418	V1:TMT10plex:1000.00;K7:Lac:139.79;K12:TMT10plex:1000.00
HaCaT-R2	P29401	V(+229.16)LDPFTIK(+72.02)PLDR	538	531	542	106.06	F2:33936	13.5946	V1:TMT10plex:1000.00;K8:Lac:1000.00
HaCaT-R2	P62937	V(+229.16)SFELFADK(+72.02)VPK(+229.16)	28	20	31	108.19	F4:34620	64.317	V1:TMT10plex:1000.00;K9:Lac:40.63;K12:TMT10plex:1000.00
HaCaT-R2	P30041	V(+229.16)VFVFGPDK(+72.02)K(+229.16)	141	133	142	99.5	F11:31557	8.0195	V1:TMT10plex:1000.00;K9:Lac:27.96;K10:TMT10plex:1000.00
HaCaT-R2	P11142	Y(+229.16)K(+72.02)AEDEK(+229.16)QR	526	525	533	49.16	F7:12817	3.37102	Y1:TMT10plex:1000.00;K2:Lac:126.14;K7:TMT10plex:1000.00
HaCaT-R2	Q14847	Y(+229.16)K(+72.02)EEFEK(+229.16)	87	86	92	71.67	F8:21442	6.91422	Y1:TMT10plex:1000.00;K2:Lac:152.29;K7:TMT10plex:1000.00
HaCaT-R2	P15121	Y(+229.16)K(+72.02)PAVNQIEC(+57.02)HPYLTQEK(+229.16)	179	178	195	74.52	F13:22187	1.11371	Y1:TMT10plex:1000.00;K2:Lac:276.92;C10:Carbamidomethylation:1000.00;K18:TMT10plex:1000.00
HAOEC-R1	Q9Y394	I(+229.16)ENFK(+72.02)SGVDADSSYFK(+229.16)	321	317	332	79.19	F8:23956	62.5717	I1:TMT10plex:1000.00;K5:Lac:153.61;K16:TMT10plex:1000.00
HAOEC-R1	P11021	K(+229.16)(+72.02)SDIDEIVLVGGSTR	353	353	367	93.92	F9:29227	76.8557	K1:TMT10plex:1000.00;K1:Lac:1000.00
HAOEC-R1	P16152	T(+229.16)DMAGPK(+72.02)ATK(+229.16)	239	233	242	43.93	F5:9999	52.4477	T1:TMT10plex:1000.00;K7:Lac:38.16;K10:TMT10plex:1000.00
HAOEC-R1	P16152	T(+229.16)DMAGPK(+72.02)ATK(+229.16)	239	233	242	43.89	F5:10026	8.56103	T1:TMT10plex:1000.00;K7:Lac:91.37;K10:TMT10plex:1000.00
HAOEC-R1	P23528	A(+229.16)VLFC(+57.02)LSEDK(+72.02)K(+229.16)	44	35	45	99.06	F1:31205	11.8492	A1:TMT10plex:1000.00;C5:Carbamidomethylation:1000.00;K10:Lac:26.02;K11:TMT10plex:1000.00
HAOEC-R1	P16152	T(+229.16)DM(+15.99)AGPK(+72.02)ATK(+229.16)	239	233	242	35.87	F5:7047	41.2612	T1:TMT10plex:1000.00;M3:Oxidation (M):1000.00;K7:Lac:32.97;K10:TMT10plex:1000.00
HAOEC-R1	P16152	T(+229.16)DM(+15.99)AGPK(+72.02)ATK(+229.16)	239	233	242	34.29	F1:7197	38.7353	T1:TMT10plex:1000.00;M3:Oxidation (M):1000.00;K7:Lac:38.16;K10:TMT10plex:1000.00
HAOEC-R1	P16152	T(+229.16)DM(+15.99)AGPK(+72.02)ATK(+229.16)	239	233	242	34.27	F1:7141	5.1909	T1:TMT10plex:1000.00;M3:Oxidation (M):1000.00;K7:Lac:51.69;K10:TMT10plex:1000.00
HAOEC-R1	O75828	T(+229.16)DM(+15.99)DGK(+72.02)DSIR	238	233	242	31.37	F7:5871	28.2927	T1:TMT10plex:1000.00;M3:Oxidation (M):1000.00;K6:Lac:1000.00
HAOEC-R1	P68104	K(+229.16)(+72.02)LEDGPK(+229.16)	386	386	392	63.81	F9:17990	44.1968	K1:TMT10plex:1000.00;K1:Lac:1000.00;K7:TMT10plex:1000.00
HAOEC-R2	P16152	T(+229.16)DMAGPK(+72.02)ATK(+229.16)	239	233	242	43.72	F3:9967	54.852	T1:TMT10plex:1000.00;K7:Lac:50.22;K10:TMT10plex:1000.00
HAOEC-R2	P16152	T(+229.16)DMAGPK(+72.02)ATK(+229.16)	239	233	242	43.72	F3:9976	7.96795	T1:TMT10plex:1000.00;K7:Lac:101.94;K10:TMT10plex:1000.00
HAOEC-R2	P16152	T(+229.16)DM(+15.99)AGPK(+72.02)ATK(+229.16)	239	233	242	35.73	F3:7016	42.0401	T1:TMT10plex:1000.00;M3:Oxidation (M):1000.00;K7:Lac:26.52;K10:TMT10plex:1000.00
HAOEC-R2	P12956	K(+229.16)(+72.02)QELLEALTK(+229.16)	596	596	605	110.88	F3:34878	37.9772	K1:TMT10plex:1000.00;K1:Lac:1000.00;K10:TMT10plex:1000.00
HAOEC-R2	P35270	G(+229.16)LQELK(+72.02)AK(+229.16)	226	221	228	60.34	F9:16687	31.5076	G1:TMT10plex:1000.00;K6:Lac:27.16;K8:TMT10plex:1000.00
HAOEC-R2	P78527	K(+229.16)(+72.02)QNNFSLAMK(+229.16)	3248	3248	3257	75.74	F2:22101	17.67	K1:TMT10plex:1000.00;K1:Lac:1000.00;K10:TMT10plex:1000.00
HAOEC-R2	Q09666	G(+229.16)DVDVSVPK(+72.02)L	1946	1938	1947	48.18	F2:11781	16.2306	G1:TMT10plex:1000.00;K9:Lac:1000.00
HAOEC-R2	O43187	M(+229.16)K(+72.02)THLLR	371	370	376	72.22	F5:21509	9.28868	M1:TMT10plex:1000.00;K2:Lac:1000.00
HAOEC-R2	P48739	M(+229.16)(+15.99)VLIK(+72.02)EFR	5	1	8	90.61	F8:28115	6.98798	M1:TMT10plex:1000.00;M1:Oxidation (M):1000.00;K5:Lac:1000.00
HAOEC-R2	Q15008	G(+229.16)DK(+72.02)EGALTAFR	117	115	125	73.17	F10:21585	13.086	G1:TMT10plex:1000.00;K3:Lac:1000.00
hepato-R1	P17516	H(+229.16)K(+72.02)LWVDPNSPVLLEDPVLC(+57.02)ALAK(+229.16)	225	224	246	91.82	F15:31615	0.687212	H1:TMT10plex:1000.00;K2:Lac:163.03;C19:Carbamidomethylation:1000.00;K23:TMT10plex:1000.00
hepato-R1	P31327	G(+229.16)K(+72.02)ATTITSVLPK(+229.16)PALVASR	402	401	419	78.57	F1:27577	2.78831	G1:TMT10plex:1000.00;K2:Lac:135.36;K12:TMT10plex:1000.00
hepato-R1	P31327	G(+229.16)K(+72.02)ATTITSVLPK(+229.16)PALVASR	402	401	419	70.79	F1:24526	1.17749	G1:TMT10plex:1000.00;K2:Lac:135.36;K12:TMT10plex:1000.00
hepato-R1	P31327	G(+229.16)K(+229.16)ATTITSVLPK(+72.02)PALVASR	412	401	419	79.81	F1:28048	16.4756	G1:TMT10plex:1000.00;K2:TMT10plex:1000.00;K12:Lac:71.03
hepato-R1	P00325	V(+229.16)C(+57.02)K(+72.02)NPESNYC(+57.02)LK(+229.16)NDLGNPR	105	103	121	57.18	F19:19562	1.32437	V1:TMT10plex:1000.00;C2:Carbamidomethylation:1000.00;K3:Lac:120.06;C10:Carbamidomethylation:1000.00;K12:TMT10plex:1000.00
hepato-R1	P05062	K(+229.16)(+72.02)YTPEQVAM(+15.99)ATVTALHR	243	243	259	77.87	F13:27607	1.17444	K1:TMT10plex:1000.00;K1:Lac:1000.00;M9:Oxidation (M):1000.00
hepato-R1	P05783	S(+229.16)NSMQTIQK(+72.02)TTTR	407	399	411	29.76	F1:8902	8.94741	S1:TMT10plex:1000.00;K9:Lac:1000.00
hepato-R1	P05783	S(+229.16)NSMQTIQK(+72.02)TTTR	407	399	411	29.76	F1:8876	7.70464	S1:TMT10plex:1000.00;K9:Lac:1000.00
hepato-R1	P61604	G(+229.16)K(+72.02)GGEIQPVSVK(+229.16)	56	55	66	53.21	F16:18218	0.658837	G1:TMT10plex:1000.00;K2:Lac:242.22;K12:TMT10plex:1000.00
hepato-R1	P61604	G(+229.16)K(+72.02)GGEIQPVSVK(+229.16)	56	55	66	56.65	F16:19617	11.998	G1:TMT10plex:1000.00;K2:Lac:158.84;K12:TMT10plex:1000.00
hepato-R1	Q16698	L(+229.16)DPTGTFEK(+72.02)EMIGR	260	252	265	70.55	F17:24096	15.1684	L1:TMT10plex:1000.00;K9:Lac:1000.00
hepato-R1	Q16698	L(+229.16)DPTGTFEK(+72.02)EMIGR	260	252	265	70.45	F14:24308	12.8214	L1:TMT10plex:1000.00;K9:Lac:1000.00
hepato-R1	P42765	E(+229.16)EC(+57.02)DK(+72.02)YALQSQQR	181	177	189	47.14	F17:14735	24.4202	E1:TMT10plex:1000.00;C3:Carbamidomethylation:1000.00;K5:Lac:1000.00
hepato-R1	P00325	V(+229.16)C(+57.02)K(+72.02)NPESNYC(+57.02)LK(+229.16)	105	103	114	59.04	F14:19788	29.0115	V1:TMT10plex:1000.00;C2:Carbamidomethylation:1000.00;K3:Lac:166.66;C10:Carbamidomethylation:1000.00;K12:TMT10plex:1000.00
hepato-R1	P00325	V(+229.16)C(+57.02)K(+72.02)NPESNYC(+57.02)LK(+229.16)	105	103	114	57.88	F11:19234	0.910065	V1:TMT10plex:1000.00;C2:Carbamidomethylation:1000.00;K3:Lac:250.15;C10:Carbamidomethylation:1000.00;K12:TMT10plex:1000.00
hepato-R1	P08319	D(+229.16)LHK(+72.02)PIQEVIIELTK(+229.16)	254	251	265	101.08	F6:35262	48.3655	D1:TMT10plex:1000.00;K4:Lac:81.27;K15:TMT10plex:1000.00
hepato-R1	P16152	T(+229.16)DMAGPK(+72.02)ATK(+229.16)	239	233	242	31.92	F19:9482	4.6109	T1:TMT10plex:1000.00;K7:Lac:101.94;K10:TMT10plex:1000.00
hepato-R1	P16152	T(+229.16)DMAGPK(+72.02)ATK(+229.16)	239	233	242	32.2	F2:9251	33.9608	T1:TMT10plex:1000.00;K7:Lac:32.97;K10:TMT10plex:1000.00
hepato-R1	P16152	T(+229.16)DMAGPK(+72.02)ATK(+229.16)	239	233	242	31.58	F22:8985	36.1807	T1:TMT10plex:1000.00;K7:Lac:38.16;K10:TMT10plex:1000.00
hepato-R1	P00325	K(+229.16)(+72.02)PFSIEDVEVAPPK(+229.16)	20	20	33	83.68	F23:29013	44.4017	K1:TMT10plex:1000.00;K1:Lac:1000.00;K14:TMT10plex:1000.00
hepato-R1	P05091	V(+229.16)IQVAAGSSNLK(+72.02)R	280	269	281	63.01	F1:21524	33.3879	V1:TMT10plex:1000.00;K12:Lac:1000.00
hepato-R1	Q16836	G(+229.16)DASK(+72.02)EDIDTAMK(+229.16)	241	237	249	42.3	F9:12023	17.2619	G1:TMT10plex:1000.00;K5:Lac:75.74;K13:TMT10plex:1000.00
hepato-R1	Q9UKK9	H(+229.16)ANAK(+229.16)PFEVPFLK(+72.02)F	218	206	219	82.98	F3:28570	4.61843	H1:TMT10plex:1000.00;K5:TMT10plex:1000.00;K13:Lac:73.16
hepato-R1	Q9UKK9	H(+229.16)ANAK(+229.16)PFEVPFLK(+72.02)F	218	206	219	83.05	F23:28771	5.0346	H1:TMT10plex:1000.00;K5:TMT10plex:1000.00;K13:Lac:83.90
hepato-R1	P61604	V(+229.16)VLDDK(+72.02)DYFLFR	86	81	92	99.25	F21:34454	1.26006	V1:TMT10plex:1000.00;K6:Lac:1000.00
hepato-R1	P61604	V(+229.16)GDK(+72.02)VLLPEYGGTK(+229.16)	70	67	80	75.81	F20:25907	0.394532	V1:TMT10plex:1000.00;K4:Lac:228.69;K14:TMT10plex:1000.00
hepato-R1	P61604	S(+229.16)AAETVTK(+72.02)GGIMLPEK(+229.16)	28	21	36	60.04	F8:20423	15.7278	S1:TMT10plex:1000.00;K8:Lac:92.95;K16:TMT10plex:1000.00
hepato-R1	P08263	K(+229.16)(+229.16)PPMDEK(+72.02)SLEEAR	211	205	217	40.98	F17:12292	22.8778	K1:TMT10plex:1000.00;K1:TMT10plex:1000.00;K7:Lac:1000.00
hepato-R1	Q16762	K(+229.16)(+72.02)VDLSQPLIATC(+57.02)R	237	237	249	73.87	F7:26569	11.3986	K1:TMT10plex:1000.00;K1:Lac:1000.00;C12:Carbamidomethylation:1000.00
hepato-R1	Q9BSH5	L(+229.16)LTWDVK(+72.02)DTLLR	15	9	20	87.7	F9:30020	25.0613	L1:TMT10plex:1000.00;K7:Lac:1000.00
hepato-R1	Q9BSH5	L(+229.16)LTWDVK(+72.02)DTLLR	15	9	20	87.82	F12:29936	14.2613	L1:TMT10plex:1000.00;K7:Lac:1000.00
hepato-R1	P61604	G(+229.16)GIMLPEK(+72.02)SQGK(+229.16)	36	29	40	48.02	F22:15455	17.1307	G1:TMT10plex:1000.00;K8:Lac:49.79;K12:TMT10plex:1000.00
hepato-R1	P61604	G(+229.16)GIMLPEK(+72.02)SQGK(+229.16)	36	29	40	48.2	F2:15699	15.6033	G1:TMT10plex:1000.00;K8:Lac:49.79;K12:TMT10plex:1000.00
hepato-R1	P42765	I(+229.16)SREEC(+57.02)DK(+72.02)YALQSQQR	181	174	189	47.2	F2:15292	4.98221	I1:TMT10plex:1000.00;C6:Carbamidomethylation:1000.00;K8:Lac:1000.00
hepato-R1	P05783	N(+229.16)LK(+72.02)ASLENSLR	317	315	325	56.03	F13:19139	77.0611	N1:TMT10plex:1000.00;K3:Lac:1000.00
hepato-R1	P05783	N(+229.16)LK(+72.02)ASLENSLR	317	315	325	55.69	F10:19384	49.9387	N1:TMT10plex:1000.00;K3:Lac:1000.00
hepato-R1	P05062	K(+229.16)(+229.16)DGVDFGK(+72.02)WR	147	140	149	55.06	F23:17657	30.8758	K1:TMT10plex:1000.00;K1:TMT10plex:1000.00;K8:Lac:1000.00
hepato-R1	P05062	K(+229.16)(+229.16)DGVDFGK(+72.02)WR	147	140	149	50.75	F9:15419	10.3557	K1:TMT10plex:1000.00;K1:TMT10plex:1000.00;K8:Lac:1000.00
hepato-R1	P05062	K(+229.16)(+229.16)DGVDFGK(+72.02)WR	147	140	149	55.52	F3:17703	34.9009	K1:TMT10plex:1000.00;K1:TMT10plex:1000.00;K8:Lac:1000.00
hepato-R1	P42765	V(+229.16)GIPK(+72.02)ETPALTINR	81	77	90	75.46	F7:27202	6.7012	V1:TMT10plex:1000.00;K5:Lac:1000.00
hepato-R1	P05062	D(+229.16)GVDFGK(+72.02)WR	147	141	149	54.94	F9:17077	9.16851	D1:TMT10plex:1000.00;K7:Lac:1000.00
hepato-R1	P05062	D(+229.16)GVDFGK(+72.02)WR	147	141	149	59.8	F20:19470	27.1502	D1:TMT10plex:1000.00;K7:Lac:1000.00
hepato-R1	P00505	K(+229.16)(+72.02)AEAQIAAK(+229.16)	82	82	90	48.25	F19:16016	2.65093	K1:TMT10plex:1000.00;K1:Lac:1000.00;K9:TMT10plex:1000.00
hepato-R1	P00441	K(+229.16)(+72.02)HGGPK(+229.16)DEER	71	71	80	23.4	F11:5826	34.0043	K1:TMT10plex:1000.00;K1:Lac:1000.00;K6:TMT10plex:1000.00
hepato-R1	P16152	T(+229.16)DM(+15.99)AGPK(+72.02)ATK(+229.16)	239	233	242	22.9	F22:5769	27.3821	T1:TMT10plex:1000.00;M3:Oxidation (M):1000.00;K7:Lac:38.16;K10:TMT10plex:1000.00
hepato-R1	P35270	G(+229.16)LQELK(+72.02)AK(+229.16)	226	221	228	46.28	F8:14843	23.97	G1:TMT10plex:1000.00;K6:Lac:39.76;K8:TMT10plex:1000.00
hepato-R1	Q7Z4W1	A(+229.16)K(+72.02)TMLNR	198	197	203	27.55	F1:8085	26.6472	A1:TMT10plex:1000.00;K2:Lac:1000.00
hepato-R1	Q9Y6I3	A(+229.16)HALK(+229.16)TK(+72.02)EK(+229.16)	151	145	153	40.18	F18:11039	2.81807	A1:TMT10plex:1000.00;K5:TMT10plex:1000.00;K7:Lac:43.88;K9:TMT10plex:1000.00
hepato-R1	Q9BWD1	K(+229.16)(+72.02)GLIEVK(+229.16)	211	211	217	50.67	F14:16412	2.00654	K1:TMT10plex:1000.00;K1:Lac:1000.00;K7:TMT10plex:1000.00
hepato-R1	Q8WVM8	Y(+229.16)FDPK(+72.02)MLR	572	568	575	51.37	F15:15612	0.421165	Y1:TMT10plex:1000.00;K5:Lac:1000.00
hepato-R2	P30084	G(+229.16)K(+72.02)NNTVGLIQLNRPK(+229.16)	43	42	56	60.35	F1:20509	5.30818	G1:TMT10plex:1000.00;K2:Lac:249.09;K15:TMT10plex:1000.00
hepato-R2	P31327	G(+229.16)K(+72.02)ATTITSVLPK(+229.16)PALVASR	402	401	419	77.41	F1:27220	0.922791	G1:TMT10plex:1000.00;K2:Lac:158.84;K12:TMT10plex:1000.00
hepato-R2	P05062	A(+229.16)LNDHHVYLEGTLLK(+72.02)PNMVTAGHAC(+57.02)TK(+229.16)	230	216	242	59.31	F20:18558	28.2117	A1:TMT10plex:1000.00;K15:Lac:96.93;C25:Carbamidomethylation:1000.00;K27:TMT10plex:1000.00
hepato-R2	P05062	A(+229.16)LNDHHVYLEGTLLK(+72.02)PNMVTAGHAC(+57.02)TK(+229.16)	230	216	242	59.42	F20:18574	9.63446	A1:TMT10plex:1000.00;K15:Lac:85.14;C25:Carbamidomethylation:1000.00;K27:TMT10plex:1000.00
hepato-R2	P00325	V(+229.16)C(+57.02)K(+72.02)NPESNYC(+57.02)LK(+229.16)	105	103	114	60.73	F14:19382	23.7904	V1:TMT10plex:1000.00;C2:Carbamidomethylation:1000.00;K3:Lac:199.69;C10:Carbamidomethylation:1000.00;K12:TMT10plex:1000.00
hepato-R2	Q16698	F(+229.16)NVIQPGPIK(+72.02)TK(+229.16)	244	235	246	65.3	F16:22276	4.43492	F1:TMT10plex:1000.00;K10:Lac:32.28;K12:TMT10plex:1000.00
hepato-R2	Q16698	F(+229.16)NVIQPGPIK(+72.02)TK(+229.16)	244	235	246	65.31	F13:21801	4.3758	F1:TMT10plex:1000.00;K10:Lac:26.31;K12:TMT10plex:1000.00
hepato-R2	Q16762	K(+229.16)(+72.02)VDLSQPLIATC(+57.02)R	237	237	249	75.21	F7:26476	11.1795	K1:TMT10plex:1000.00;K1:Lac:1000.00;C12:Carbamidomethylation:1000.00
hepato-R2	Q6YN16	K(+229.16)(+72.02)VESTGAVPEFK(+229.16)EEK(+229.16)	284	284	298	48.93	F9:13667	0.442047	K1:TMT10plex:1000.00;K1:Lac:1000.00;K12:TMT10plex:1000.00;K15:TMT10plex:1000.00
hepato-R2	Q6YN16	K(+229.16)(+72.02)VESTGAVPEFK(+229.16)EEK(+229.16)	284	284	298	48.92	F9:13695	3.16749	K1:TMT10plex:1000.00;K1:Lac:1000.00;K12:TMT10plex:1000.00;K15:TMT10plex:1000.00
hepato-R2	P08319	D(+229.16)LHK(+72.02)PIQEVIIELTK(+229.16)	254	251	265	102.99	F6:34977	19.0416	D1:TMT10plex:1000.00;K4:Lac:67.73;K15:TMT10plex:1000.00
hepato-R2	Q16698	L(+229.16)DPTGTFEK(+72.02)EMIGR	260	252	265	72.39	F17:23828	15.2398	L1:TMT10plex:1000.00;K9:Lac:1000.00
hepato-R2	P16152	T(+229.16)DMAGPK(+72.02)ATK(+229.16)	239	233	242	32.71	F19:9214	6.88151	T1:TMT10plex:1000.00;K7:Lac:77.24;K10:TMT10plex:1000.00
hepato-R2	P16152	T(+229.16)DMAGPK(+72.02)ATK(+229.16)	239	233	242	33.07	F2:8677	26.341	T1:TMT10plex:1000.00;K7:Lac:38.16;K10:TMT10plex:1000.00
hepato-R2	P05062	I(+229.16)K(+72.02)VENTEENRR	48	47	57	44.91	F13:13724	4.05019	I1:TMT10plex:1000.00;K2:Lac:1000.00
hepato-R2	P42765	E(+229.16)EC(+57.02)DK(+72.02)YALQSQQR	181	177	189	48.72	F17:14417	11.4314	E1:TMT10plex:1000.00;C3:Carbamidomethylation:1000.00;K5:Lac:1000.00
hepato-R2	P07148	A(+229.16)IGLPEELIQK(+72.02)GK(+229.16)	31	21	33	73.23	F17:24182	6.99681	A1:TMT10plex:1000.00;K11:Lac:22.85;K13:TMT10plex:1000.00
hepato-R2	Q14749	S(+229.16)DLTK(+72.02)DVTTSVLIVNNK(+229.16)	203	199	215	75.59	F8:25376	1.42671	S1:TMT10plex:1000.00;K5:Lac:71.31;K17:TMT10plex:1000.00
hepato-R2	P61604	G(+229.16)GIMLPEK(+72.02)SQGK(+229.16)	36	29	40	49.83	F2:15361	16.3583	G1:TMT10plex:1000.00;K8:Lac:49.79;K12:TMT10plex:1000.00
hepato-R2	P61604	G(+229.16)GIMLPEK(+72.02)SQGK(+229.16)	36	29	40	49.83	F22:15497	16.0312	G1:TMT10plex:1000.00;K8:Lac:49.79;K12:TMT10plex:1000.00
hepato-R2	Q9BSH5	L(+229.16)LTWDVK(+72.02)DTLLR	15	9	20	89.69	F9:29752	27.8258	L1:TMT10plex:1000.00;K7:Lac:1000.00
hepato-R2	Q9BSH5	L(+229.16)LTWDVK(+72.02)DTLLR	15	9	20	89.83	F12:29648	15.1099	L1:TMT10plex:1000.00;K7:Lac:1000.00
hepato-R2	P05062	K(+229.16)(+229.16)DGVDFGK(+72.02)WR	147	140	149	52.41	F9:15056	6.61168	K1:TMT10plex:1000.00;K1:TMT10plex:1000.00;K8:Lac:1000.00
hepato-R2	P05062	K(+229.16)(+229.16)DGVDFGK(+72.02)WR	147	140	149	56.77	F23:17288	39.5054	K1:TMT10plex:1000.00;K1:TMT10plex:1000.00;K8:Lac:1000.00
hepato-R2	P05062	K(+229.16)(+229.16)DGVDFGK(+72.02)WR	147	140	149	57.03	F3:17277	37.0024	K1:TMT10plex:1000.00;K1:TMT10plex:1000.00;K8:Lac:1000.00
hepato-R2	P61604	V(+229.16)GDK(+72.02)VLLPEYGGTK(+229.16)	70	67	80	78.89	F20:26319	1.18048	V1:TMT10plex:1000.00;K4:Lac:116.35;K14:TMT10plex:1000.00
hepato-R2	P61604	V(+229.16)GDK(+72.02)VLLPEYGGTK(+229.16)	70	67	80	80.6	F3:26660	8.15077	V1:TMT10plex:1000.00;K4:Lac:116.35;K14:TMT10plex:1000.00
hepato-R2	P42765	I(+229.16)SREEC(+57.02)DK(+72.02)YALQSQQR	181	174	189	48.57	F2:14818	24.5697	I1:TMT10plex:1000.00;C6:Carbamidomethylation:1000.00;K8:Lac:1000.00
hepato-R2	P42765	I(+229.16)SREEC(+57.02)DK(+72.02)YALQSQQR	181	174	189	48.46	F19:15470	5.8389	I1:TMT10plex:1000.00;C6:Carbamidomethylation:1000.00;K8:Lac:1000.00
hepato-R2	Q9UKK9	H(+229.16)ANAK(+229.16)PFEVPFLK(+72.02)F	218	206	219	84.91	F23:28437	3.84189	H1:TMT10plex:1000.00;K5:TMT10plex:1000.00;K13:Lac:81.34
hepato-R2	P00325	I(+229.16)K(+72.02)M(+15.99)VAVGIC(+57.02)R	40	39	48	65.88	F1:22710	2.81844	I1:TMT10plex:1000.00;K2:Lac:1000.00;M3:Oxidation (M):1000.00;C9:Carbamidomethylation:1000.00
hepato-R2	P05062	D(+229.16)GVDFGK(+72.02)WR	147	141	149	61.33	F20:19346	22.71	D1:TMT10plex:1000.00;K7:Lac:1000.00
hepato-R2	P05062	D(+229.16)GVDFGK(+72.02)WR	147	141	149	56.59	F6:16891	10.0408	D1:TMT10plex:1000.00;K7:Lac:1000.00
hepato-R2	P16152	T(+229.16)DM(+15.99)AGPK(+72.02)ATK(+229.16)	239	233	242	23.48	F19:5582	25.0079	T1:TMT10plex:1000.00;M3:Oxidation (M):1000.00;K7:Lac:38.16;K10:TMT10plex:1000.00
hepato-R2	P05783	N(+229.16)LK(+72.02)ASLENSLR	317	315	325	57.48	F10:19182	50.9116	N1:TMT10plex:1000.00;K3:Lac:1000.00
hepato-R2	P00966	G(+229.16)VPVK(+72.02)VTNVK(+229.16)	234	230	239	65.62	F7:22790	4.94215	G1:TMT10plex:1000.00;K5:Lac:100.21;K10:TMT10plex:1000.00
hepato-R2	Q9HCE5	F(+229.16)EEYPK(+72.02)LRELIR	148	143	154	76.68	F2:25773	3.41161	F1:TMT10plex:1000.00;K6:Lac:1000.00
hepato-R2	O14867	N(+229.16)DFQSLLK(+72.02)MHK(+229.16)	546	539	549	44.28	F21:11559	0.782781	N1:TMT10plex:1000.00;K8:Lac:77.24;K11:TMT10plex:1000.00
hepato-R2	P35270	G(+229.16)LQELK(+72.02)AK(+229.16)	226	221	228	47.72	F8:14285	21.6194	G1:TMT10plex:1000.00;K6:Lac:39.76;K8:TMT10plex:1000.00
hepato-R2	P17516	H(+229.16)K(+72.02)LWVDPNSPVLL	225	224	236	79.42	F23:26306	1.51817	H1:TMT10plex:1000.00;K2:Lac:1000.00
hepato-R2	Q9BWD1	K(+229.16)(+72.02)GLIEVK(+229.16)	211	211	217	52.1	F14:15990	1.09969	K1:TMT10plex:1000.00;K1:Lac:1000.00;K7:TMT10plex:1000.00
hepato-R2	Q9BWD1	K(+229.16)(+72.02)GLIEVK(+229.16)	211	211	217	52.21	F11:16108	11.1991	K1:TMT10plex:1000.00;K1:Lac:1000.00;K7:TMT10plex:1000.00
HepG2-R1	Q9Y394	I(+229.16)ENFK(+72.02)SGVDADSSYFK(+229.16)	321	317	332	73.92	F6:22423	41.684	I1:TMT10plex:1000.00;K5:Lac:118.01;K16:TMT10plex:1000.00
HepG2-R1	Q9Y394	R(+229.16)IENFK(+72.02)SGVDADSSYFK(+229.16)	321	316	332	62.66	F7:18288	2.70028	R1:TMT10plex:1000.00;K6:Lac:134.40;K17:TMT10plex:1000.00
HepG2-R1	Q6YN16	K(+229.16)(+72.02)VESTGAVPEFK(+229.16)	284	284	295	60.94	F4:17498	0.897282	K1:TMT10plex:1000.00;K1:Lac:1000.00;K12:TMT10plex:1000.00
HepG2-R1	Q13268	N(+229.16)FK(+72.02)EHHQLQR	237	235	244	26.3	F1:4553	39.148	N1:TMT10plex:1000.00;K3:Lac:1000.00
HepG2-R1	P16152	T(+229.16)DM(+15.99)AGPK(+72.02)ATK(+229.16)	239	233	242	32.73	F3:6936	29.6918	T1:TMT10plex:1000.00;M3:Oxidation (M):1000.00;K7:Lac:38.16;K10:TMT10plex:1000.00
HepG2-R1	Q9BQS8	R(+229.16)DK(+72.02)DALWQK(+229.16)	1148	1146	1154	45.84	F2:11614	2.20421	R1:TMT10plex:1000.00;K3:Lac:82.63;K9:TMT10plex:1000.00
HepG2-R1	P78527	K(+229.16)(+72.02)QNNFSLAMK(+229.16)	3248	3248	3257	74.82	F3:22922	32.974	K1:TMT10plex:1000.00;K1:Lac:1000.00;K10:TMT10plex:1000.00
HepG2-R1	P78527	K(+229.16)(+72.02)QNNFSLAMK(+229.16)	3248	3248	3257	71.38	F12:22190	15.2636	K1:TMT10plex:1000.00;K1:Lac:1000.00;K10:TMT10plex:1000.00
HepG2-R1	P78527	K(+229.16)(+72.02)QNNFSLAMK(+229.16)	3248	3248	3257	71.31	F3:21547	16.6514	K1:TMT10plex:1000.00;K1:Lac:1000.00;K10:TMT10plex:1000.00
HepG2-R1	Q10469	R(+229.16)K(+72.02)VLILTLV	9	8	16	77.92	F11:24031	4.07775	R1:TMT10plex:1000.00;K2:Lac:1000.00
HepG2-R1	P35270	G(+229.16)LQELK(+72.02)AK(+229.16)	226	221	228	56.03	F10:16400	24.0646	G1:TMT10plex:1000.00;K6:Lac:39.76;K8:TMT10plex:1000.00
HepG2-R1	P30040	D(+229.16)GDFENPVPYTGAVK(+72.02)VG	137	123	139	71.9	F2:21544	1.96243	D1:TMT10plex:1000.00;K15:Lac:1000.00
HepG2-R1	Q8WVM8	Y(+229.16)FDPK(+72.02)MLR	572	568	575	61.01	F5:17384	1.2103	Y1:TMT10plex:1000.00;K5:Lac:1000.00
HepG2-R1	P78318	V(+229.16)FK(+72.02)GLDLLEK(+229.16)	44	42	51	107.2	F10:35509	2.61791	V1:TMT10plex:1000.00;K3:Lac:38.64;K10:TMT10plex:1000.00
HepG2-R2	Q9Y394	R(+229.16)IENFK(+72.02)SGVDADSSYFK(+229.16)	321	316	332	62.59	F7:19072	2.2266	R1:TMT10plex:1000.00;K6:Lac:132.83;K17:TMT10plex:1000.00
HepG2-R2	P16152	T(+229.16)DM(+15.99)AGPK(+72.02)ATK(+229.16)	239	233	242	32.82	F3:7371	27.7203	T1:TMT10plex:1000.00;M3:Oxidation (M):1000.00;K7:Lac:25.20;K10:TMT10plex:1000.00
HepG2-R2	P68104	K(+229.16)(+72.02)LEDGPK(+229.16)	386	386	392	58.57	F8:17413	49.8827	K1:TMT10plex:1000.00;K1:Lac:1000.00;K7:TMT10plex:1000.00
HepG2-R2	Q8WVM8	Y(+229.16)FDPK(+72.02)MLR	572	568	575	61.35	F5:18028	2.24695	Y1:TMT10plex:1000.00;K5:Lac:1000.00
HepG2-R2	Q8WVM8	Y(+229.16)FDPK(+72.02)MLR	572	568	575	61.23	F6:18019	1.23843	Y1:TMT10plex:1000.00;K5:Lac:1000.00
HepG2-R2	P78527	K(+229.16)(+72.02)QNNFSLAMK(+229.16)	3248	3248	3257	71.73	F3:22047	14.6666	K1:TMT10plex:1000.00;K1:Lac:1000.00;K10:TMT10plex:1000.00
HepG2-R2	P78527	K(+229.16)(+72.02)QNNFSLAMK(+229.16)	3248	3248	3257	71.38	F2:22190	15.2636	K1:TMT10plex:1000.00;K1:Lac:1000.00;K10:TMT10plex:1000.00
HepG2-R2	P35270	G(+229.16)LQELK(+72.02)AK(+229.16)	226	221	228	56.5	F10:16546	23.3853	G1:TMT10plex:1000.00;K6:Lac:60.92;K8:TMT10plex:1000.00
HepG2-R2	P35270	G(+229.16)LQELK(+72.02)AK(+229.16)	226	221	228	56.57	F11:16556	25.0029	G1:TMT10plex:1000.00;K6:Lac:26.31;K8:TMT10plex:1000.00
HepG2-R2	P15822	T(+229.16)EASPK(+72.02)IDFLNK(+229.16)	1335	1330	1341	99.81	F5:32351	1.09591	T1:TMT10plex:1000.00;K6:Lac:203.88;K12:TMT10plex:1000.00
HepG2-R2	Q6PI77	P(+229.16)LIHK(+72.02)IAR	342	338	345	96.41	F10:31512	3.61255	P1:TMT10plex:1000.00;K5:Lac:1000.00
pT-R1	P29401	S(+229.16)K(+72.02)DDQVTVIGAGVTLHEALAAAELLK(+229.16)K(+229.16)	499	498	524	106.31	F2:32757	2.68617	S1:TMT10plex:1000.00;K2:Lac:119.14;K26:TMT10plex:1000.00;K27:TMT10plex:1000.00
pT-R1	P07737	T(+229.16)FVNITPAEVGVLVGK(+72.02)DR	54	39	56	103.13	F3:31729	12.1213	T1:TMT10plex:1000.00;K16:Lac:1000.00
pT-R1	P07737	T(+229.16)FVNITPAEVGVLVGK(+72.02)DR	54	39	56	103.15	F3:31755	10.313	T1:TMT10plex:1000.00;K16:Lac:1000.00
pT-R1	P32119	K(+229.16)(+72.02)EGGLGPLNIPLLADVTR	92	92	109	107.92	F4:33263	2.58468	K1:TMT10plex:1000.00;K1:Lac:1000.00
pT-R1	P68104	V(+229.16)ETGVLK(+72.02)PGM(+15.99)VVTFAPVNVTTEVK(+229.16)	273	267	290	96.66	F3:29498	27.1611	V1:TMT10plex:1000.00;K7:Lac:129.75;M10:Oxidation (M):1000.00;K24:TMT10plex:1000.00
pT-R1	P68104	V(+229.16)ETGVLK(+72.02)PGM(+15.99)VVTFAPVNVTTEVK(+229.16)	273	267	290	96.56	F3:29450	52.1147	V1:TMT10plex:1000.00;K7:Lac:42.74;M10:Oxidation (M):1000.00;K24:TMT10plex:1000.00
pT-R1	P00558	S(+229.16)LLGK(+72.02)DVLFLK(+229.16)DC(+57.02)VGPEVEK(+229.16)	91	87	106	102.58	F1:31445	1.75008	S1:TMT10plex:1000.00;K5:Lac:95.35;K11:TMT10plex:1000.00;C13:Carbamidomethylation:1000.00;K20:TMT10plex:1000.00
pT-R1	P26038	E(+229.16)RQEAEEAK(+72.02)EALLQASR	400	392	408	81.45	F6:24160	98.4475	E1:TMT10plex:1000.00;K9:Lac:1000.00
pT-R1	P29401	V(+229.16)LDPFTIK(+72.02)PLDRK(+229.16)	538	531	543	93.08	F8:28378	33.6925	V1:TMT10plex:1000.00;K8:Lac:26.00;K13:TMT10plex:1000.00
pT-R1	P09211	A(+229.16)LPGQLK(+72.02)PFETLLSQNQGGK(+229.16)	128	122	141	101.53	F8:31415	100	A1:TMT10plex:1000.00;K7:Lac:46.79;K20:TMT10plex:1000.00
pT-R1	P62937	V(+229.16)SFELFADK(+72.02)VPK(+229.16)	28	20	31	103.92	F5:32003	66.2741	V1:TMT10plex:1000.00;K9:Lac:44.44;K12:TMT10plex:1000.00
pT-R1	P78417	E(+229.16)FTK(+72.02)LEEVLTNK(+229.16)K(+229.16)	152	149	161	95.88	F2:29036	6.28617	E1:TMT10plex:1000.00;K4:Lac:217.23;K12:TMT10plex:1000.00;K13:TMT10plex:1000.00
pT-R1	P16152	T(+229.16)DM(+15.99)AGPK(+72.02)ATK(+229.16)	239	233	242	36.56	F4:7545	33.7928	T1:TMT10plex:1000.00;M3:Oxidation (M):1000.00;K7:Lac:32.97;K10:TMT10plex:1000.00
pT-R1	P16152	T(+229.16)DM(+15.99)AGPK(+72.02)ATK(+229.16)	239	233	242	36.92	F8:7820	38.4371	T1:TMT10plex:1000.00;M3:Oxidation (M):1000.00;K7:Lac:32.97;K10:TMT10plex:1000.00
pT-R1	P16152	T(+229.16)DM(+15.99)AGPK(+72.02)ATK(+229.16)	239	233	242	36.97	F9:7551	7.55187	T1:TMT10plex:1000.00;M3:Oxidation (M):1000.00;K7:Lac:44.44;K10:TMT10plex:1000.00
pT-R1	P16152	T(+229.16)DM(+15.99)AGPK(+72.02)ATK(+229.16)	239	233	242	36.97	F9:7514	32.2431	T1:TMT10plex:1000.00;M3:Oxidation (M):1000.00;K7:Lac:32.97;K10:TMT10plex:1000.00
pT-R1	P16152	T(+229.16)DM(+15.99)AGPK(+72.02)ATK(+229.16)	239	233	242	36.55	F4:7567	6.67215	T1:TMT10plex:1000.00;M3:Oxidation (M):1000.00;K7:Lac:32.97;K10:TMT10plex:1000.00
pT-R1	P07737	T(+229.16)DK(+72.02)TLVLLM(+15.99)GK(+229.16)	108	106	116	90.63	F7:27639	10.9472	T1:TMT10plex:1000.00;K3:Lac:93.17;M9:Oxidation (M):1000.00;K11:TMT10plex:1000.00
pT-R1	P07737	T(+229.16)DK(+72.02)TLVLLM(+15.99)GK(+229.16)	108	106	116	88.45	F3:26421	1.53918	T1:TMT10plex:1000.00;K3:Lac:97.31;M9:Oxidation (M):1000.00;K11:TMT10plex:1000.00
pT-R1	P23528	N(+229.16)IILEEGK(+72.02)EILVGDVGQTVDDPYATFVK(+229.16)	53	46	73	105.21	F8:32664	3.0755	N1:TMT10plex:1000.00;K8:Lac:75.36;K28:TMT10plex:1000.00
pT-R1	P27707	L(+229.16)K(+72.02)DAEK(+229.16)PVLFFER	117	116	128	90.34	F1:27036	11.3797	L1:TMT10plex:1000.00;K2:Lac:58.99;K6:TMT10plex:1000.00
pT-R1	P11142	Y(+229.16)K(+72.02)AEDEK(+229.16)QR	526	525	533	46.78	F7:11642	4.80567	Y1:TMT10plex:1000.00;K2:Lac:127.18;K7:TMT10plex:1000.00
pT-R1	P00558	L(+229.16)TLDK(+72.02)LDVK(+229.16)	11	7	15	92.24	F1:27687	17.7903	L1:TMT10plex:1000.00;K5:Lac:121.83;K9:TMT10plex:1000.00
pT-R1	P00558	L(+229.16)TLDK(+72.02)LDVK(+229.16)	11	7	15	92.14	F1:27729	60.6222	L1:TMT10plex:1000.00;K5:Lac:87.62;K9:TMT10plex:1000.00
pT-R1	Q01518	T(+229.16)HK(+72.02)NPALK(+229.16)	282	280	287	45.87	F1:10803	1.57373	T1:TMT10plex:1000.00;K3:Lac:98.37;K8:TMT10plex:1000.00
pT-R1	Q01518	T(+229.16)HK(+72.02)NPALK(+229.16)	282	280	287	45.9	F1:10822	5.09387	T1:TMT10plex:1000.00;K3:Lac:115.97;K8:TMT10plex:1000.00
pT-R1	P35579	N(+229.16)AEQYK(+72.02)DQADK(+229.16)	1862	1857	1867	54.45	F2:13971	1.07721	N1:TMT10plex:1000.00;K6:Lac:170.04;K11:TMT10plex:1000.00
pT-R1	P13796	V(+229.16)NK(+72.02)PPYPK(+229.16)	444	442	449	67.59	F2:18839	52.713	V1:TMT10plex:1000.00;K3:Lac:24.08;K8:TMT10plex:1000.00
pT-R1	P26038	A(+229.16)K(+72.02)FYPEDVSEEL	83	82	93	95.84	F8:29357	8.16543	A1:TMT10plex:1000.00;K2:Lac:1000.00
pT-R1	P13639	L(+229.16)IEK(+72.02)LDIK(+229.16)	318	315	322	98.52	F1:29993	3.35287	L1:TMT10plex:1000.00;K4:Lac:111.84;K8:TMT10plex:1000.00
pT-R2	P35579	K(+229.16)(+72.02)LEEEQIILEDQNC(+57.02)K(+229.16)	975	975	989	85.06	F2:25611	1.47614	K1:TMT10plex:1000.00;K1:Lac:1000.00;C14:Carbamidomethylation:1000.00;K15:TMT10plex:1000.00
pT-R2	P04075	S(+229.16)K(+72.02)GGVVGIK(+229.16)VDK(+229.16)	101	100	111	68.8	F1:19616	2.36203	S1:TMT10plex:1000.00;K2:Lac:140.21;K9:TMT10plex:1000.00;K12:TMT10plex:1000.00
pT-R2	P13796	T(+229.16)ENLNDDEK(+72.02)LNNAK(+229.16)	579	571	584	67.64	F4:19167	100	T1:TMT10plex:1000.00;K9:Lac:79.02;K14:TMT10plex:1000.00
pT-R2	P26038	E(+229.16)RQEAEEAK(+72.02)EALLQASR	400	392	408	88.65	F6:26793	100	E1:TMT10plex:1000.00;K9:Lac:1000.00
pT-R2	P35579	K(+229.16)(+72.02)QELEEIC(+57.02)HDLEAR	910	910	923	90.2	F1:27210	19.6425	K1:TMT10plex:1000.00;K1:Lac:1000.00;C8:Carbamidomethylation:1000.00
pT-R2	P07737	T(+229.16)DK(+72.02)TLVLLM(+15.99)GK(+229.16)	108	106	116	95.18	F7:28953	12.1456	T1:TMT10plex:1000.00;K3:Lac:75.74;M9:Oxidation (M):1000.00;K11:TMT10plex:1000.00
pT-R2	P07737	T(+229.16)DK(+72.02)TLVLLM(+15.99)GK(+229.16)	108	106	116	95.21	F7:28948	18.8941	T1:TMT10plex:1000.00;K3:Lac:101.72;M9:Oxidation (M):1000.00;K11:TMT10plex:1000.00
pT-R2	P09211	T(+229.16)LGLYGK(+72.02)DQQEAALVDM(+15.99)VNDGVEDLR	82	76	101	99.47	F6:30592	1.82788	T1:TMT10plex:1000.00;K7:Lac:1000.00;M17:Oxidation (M):1000.00
pT-R2	P16152	T(+229.16)DMAGPK(+72.02)ATK(+229.16)	239	233	242	45.49	F9:11245	52.4703	T1:TMT10plex:1000.00;K7:Lac:38.16;K10:TMT10plex:1000.00
pT-R2	P23528	K(+229.16)(+72.02)AVLFC(+57.02)LSEDK(+229.16)K(+229.16)	34	34	45	98.66	F5:30293	1.2435	K1:TMT10plex:1000.00;K1:Lac:1000.00;C6:Carbamidomethylation:1000.00;K11:TMT10plex:1000.00;K12:TMT10plex:1000.00
pT-R2	P26038	K(+229.16)(+72.02)AQQELEEQTRR	360	360	371	49.72	F3:12913	2.41699	K1:TMT10plex:1000.00;K1:Lac:1000.00
pT-R2	P16152	T(+229.16)DM(+15.99)AGPK(+72.02)ATK(+229.16)	239	233	242	37.69	F9:8420	6.34493	T1:TMT10plex:1000.00;M3:Oxidation (M):1000.00;K7:Lac:38.16;K10:TMT10plex:1000.00
pT-R2	P16152	T(+229.16)DM(+15.99)AGPK(+72.02)ATK(+229.16)	239	233	242	37.69	F9:8365	29.529	T1:TMT10plex:1000.00;M3:Oxidation (M):1000.00;K7:Lac:29.32;K10:TMT10plex:1000.00
pT-R2	P08133	N(+229.16)K(+72.02)PLFFADK(+229.16)	600	599	607	95.43	F3:29177	55.2581	N1:TMT10plex:1000.00;K2:Lac:85.08;K9:TMT10plex:1000.00
pT-R2	P62937	V(+229.16)K(+72.02)EGM(+15.99)NIVEAM(+15.99)ER	133	132	144	68.64	F9:19560	4.40079	V1:TMT10plex:1000.00;K2:Lac:1000.00;M5:Oxidation (M):1000.00;M11:Oxidation (M):1000.00
pT-R2	P16949	K(+229.16)(+72.02)LEAAEER	53	53	60	58.26	F2:16037	10.8526	K1:TMT10plex:1000.00;K1:Lac:1000.00
pT-R2	P00367	G(+229.16)ASIVEDK(+72.02)LVEDLR	84	77	90	106.27	F5:32982	4.70465	G1:TMT10plex:1000.00;K8:Lac:1000.00
pT-R2	P50991	G(+229.16)K(+72.02)GAYQDR	21	20	27	41.12	F2:9993	3.07892	G1:TMT10plex:1000.00;K2:Lac:1000.00
pT-R2	P11142	L(+229.16)SK(+72.02)EDIER	512	510	517	70.01	F6:20213	2.19588	L1:TMT10plex:1000.00;K3:Lac:1000.00
pT-R2	P04080	A(+229.16)K(+72.02)HDELTYF	91	90	98	78.02	F4:22871	1.37293	A1:TMT10plex:1000.00;K2:Lac:1000.00
Note: RT, retention time (min) ; BP, base peak ; cycIm, the “cyclic” immonium ion ; linIm, the “linear” immonium ion
