# Supplementary material for: Discovery of Signature Cyclic Immonium Ion for Lactyllysine Reveals Widespread and Functional Lactylation on Non-histone Proteins
Source: Research Square preprint supplement (doi:10.21203/rs.3.rs-916390/v1), 2021-09-24
Supplement: Supplementary file 3 [file 933723c5b68a6144b921643d.xlsx]

## Sheet: Rotenone
	Summary of the identified lactylated peptides from SILAC-processed and affinity-enriched proteome datasets collected from MCF-7 cells in response to rotenone intervention.
Protein Accession	Protein description	Peptide	Unique	cycIm/BP	linIm/BP	Start	End	AScore	Ratio after normalization	Quantify(Yes/No)	TF
P62805	Histone H4 OS=Homo sapiens OX=9606 GN=HIST1H4A PE=1 SV=2	GGK(*)GLGK	Y	1	0.0630471	7	13	K3:Lac:61.77	1.74825	Y
P62805	Histone H4 OS=Homo sapiens OX=9606 GN=HIST1H4A PE=1 SV=2	GLGK(*)GGAK	Y	0.292365	0.0167524	10	17	K4:Lac:34.30	1.25874	Y
P68431	Histone H3.1 OS=Homo sapiens OX=9606 GN=HIST1H3A PE=1 SV=2	QLATK(*)AAR	Y	0.192764	0.026773	20	27	K5:Lac:1000.00	can't be normalized to protein abundance ratio	N
Q71DI3	Histone H3.2 OS=Homo sapiens OX=9606 GN=HIST2H3A PE=1 SV=3	QLATK(*)AAR	Y	0.192764	0.026773	20	27	K5:Lac:1000.00	can't be normalized to protein abundance ratio	N
Q99880	Histone H2B type 1-L OS=Homo sapiens OX=9606 GN=HIST1H2BL PE=1 SV=3	PELAK(*)SAPAPK	Y	0.406045	0.0424914	2	12	K5:Lac:102.87	1.42177	Y
P58876	Histone H2B type 1-D OS=Homo sapiens OX=9606 GN=HIST1H2BD PE=1 SV=2	PEPTK(*)SAPAPK	Y	0.130428	0.0299351	2	12	K5:Lac:62.39	1.40816	Y
P68431	Histone H3.1 OS=Homo sapiens OX=9606 GN=HIST1H3A PE=1 SV=2	KQLATK(*)AAR	Y	0.0816961	0.0332961	19	27	K6:Lac:61.26	can't be normalized to protein abundance ratio	N
Q71DI3	Histone H3.2 OS=Homo sapiens OX=9606 GN=HIST2H3A PE=1 SV=3	KQLATK(*)AAR	Y	0.0816961	0.0332961	19	27	K6:Lac:61.26	can't be normalized to protein abundance ratio	N
Q99879	Histone H2B type 1-M OS=Homo sapiens OX=9606 GN=HIST1H2BM PE=1 SV=3	PEPVK(*)SAPVPK	Y	0.120095	0.0453242	2	12	K5:Lac:66.56	1.53061	Y
P04075	Fructose-bisphosphate aldolase A OS=Homo sapiens OX=9606 GN=ALDOA PE=1 SV=2	DGADFAK(*)WR	Y	0.17566	0.0463737	141	149	K7:Lac:1000.00	1.58621	Y	not in TF Database
P21291	Cysteine and glycine-rich protein 1 OS=Homo sapiens OX=9606 GN=CSRP1 PE=1 SV=3	FAQK(*)IGGSER	Y	0.408359	0.0456578	109	118	K4:Lac:1000.00	1.34375	Y	not in TF Database
O60869	Endothelial differentiation-related factor 1 OS=Homo sapiens OX=9606 GN=EDF1 PE=1 SV=1	SK(*)QAILAAQR	Y	0.989732	0.0217036	24	33	K2:Lac:1000.00	1.44286	Y	Unlikely to be sequence specific TF
Q5QNW6	Histone H2B type 2-F OS=Homo sapiens OX=9606 GN=HIST2H2BF PE=1 SV=3	AVTK(*)VQK	Y	0.292079	0.0411452	18	24	K4:Lac:37.54	1.35374	Y
P19338	Nucleolin OS=Homo sapiens OX=9606 GN=NCL PE=1 SV=3	TVTPAK(*)AVTTPGK	Y	0.110812	0.9818	97	109	K6:Lac:72.07	1.81081	Y	not in TF Database
P06748	Nucleophosmin OS=Homo sapiens OX=9606 GN=NPM1 PE=1 SV=2	SK(*)GQESFK	Y	1	0.0187981	222	229	K2:Lac:63.05	1.2069	Y	Unlikely to be sequence specific TF
P68431	Histone H3.1 OS=Homo sapiens OX=9606 GN=HIST1H3A PE=1 SV=2	STGGK(*)APR	Y	0.221511	0.025688	11	18	K5:Lac:1000.00	can't be normalized to protein abundance ratio	N
Q71DI3	Histone H3.2 OS=Homo sapiens OX=9606 GN=HIST2H3A PE=1 SV=3	STGGK(*)APR	Y	0.221511	0.025688	11	18	K5:Lac:1000.00	can't be normalized to protein abundance ratio	N
P17096	High mobility group protein HMG-I/HMG-Y OS=Homo sapiens OX=9606 GN=HMGA1 PE=1 SV=3	S(+42.01)ESSSK(*)SSQPLASK	Y	0.402575	0.0540465	2	15	S1:Acetylation (Protein N-term):1000.00;K6:Lac:64.00	1.1295	Y	Known motif
P07910	Heterogeneous nuclear ribonucleoproteins C1/C2 OS=Homo sapiens OX=9606 GN=HNRNPC PE=1 SV=4	AVVPSK(*)R	Y	0.0429862	0.00908555	152	158	K6:Lac:1000.00	1.59211	Y	not in TF Database
Q9BTM1	Histone H2A.J OS=Homo sapiens OX=9606 GN=H2AFJ PE=1 SV=1	G(+42.01)KQGGK(*)VR	Y	0.44365	0.0145699	5	12	G1:Acetylation (Protein N-term):1000.00;K6:Lac:77.13	1.58805	Y
Q8N257	Histone H2B type 3-B OS=Homo sapiens OX=9606 GN=HIST3H2BB PE=1 SV=3	PDPSK(*)SAPAPK	Y	0.141126	0.0459781	2	12	K5:Lac:36.87	can't be normalized to protein abundance ratio	N
P09429	High mobility group protein B1 OS=Homo sapiens OX=9606 GN=HMGB1 PE=1 SV=3	FK(*)DPNAPK	Y	0.718603	0.060511	89	96	K2:Lac:47.38	1.2807	Y	Unlikely to be sequence specific TF
P07910	Heterogeneous nuclear ribonucleoproteins C1/C2 OS=Homo sapiens OX=9606 GN=HNRNPC PE=1 SV=4	A(+42.01)SNVTNK(*)TDPR	Y	0.0273098	0	2	12	A1:Acetylation (Protein N-term):1000.00;K7:Lac:1000.00	1.46053	Y	not in TF Database
Q99879	Histone H2B type 1-M OS=Homo sapiens OX=9606 GN=HIST1H2BM PE=1 SV=3	AINK(*)AQK	Y	0.328068	0.0177942	18	24	K4:Lac:34.94	1.35374	Y
P06748	Nucleophosmin OS=Homo sapiens OX=9606 GN=NPM1 PE=1 SV=2	TPK(*)GPSSVEDIK	Y	1	0.234916	237	248	K3:Lac:95.39	1.2069	Y	Unlikely to be sequence specific TF
P06748	Nucleophosmin OS=Homo sapiens OX=9606 GN=NPM1 PE=1 SV=2	DTPAK(*)NAQK	Y	0.131779	0	198	206	K5:Lac:34.30	1.2069	Y	Unlikely to be sequence specific TF
Q71UI9	Histone H2A.V OS=Homo sapiens OX=9606 GN=H2AFV PE=1 SV=3	A(+42.01)GKDSGK(*)AK	Y	0.397694	0.0540629	6	14	A1:Acetylation (Protein N-term):1000.00;K7:Lac:33.18	2.01754	Y
P0C0S5	Histone H2A.Z OS=Homo sapiens OX=9606 GN=H2AFZ PE=1 SV=2	A(+42.01)GKDSGK(*)AK	Y	0.397694	0.0540629	6	14	A1:Acetylation (Protein N-term):1000.00;K7:Lac:33.18	2.01754	Y
P07910	Heterogeneous nuclear ribonucleoproteins C1/C2 OS=Homo sapiens OX=9606 GN=HNRNPC PE=1 SV=4	SGFNSK(*)SGQR	Y	0.173191	0	171	180	K6:Lac:1000.00	1.17105	Y	not in TF Database
Q13185	Chromobox protein homolog 3 OS=Homo sapiens OX=9606 GN=CBX3 PE=1 SV=4	TTLQK(*)MGK	Y	0	0.215001	6	13	K5:Lac:22.45	2.2	N(cycIm=0)
P05204	Non-histone chromosomal protein HMG-17 OS=Homo sapiens OX=9606 GN=HMGN2 PE=1 SV=3	VK(*)DEPQR	Y	0.652642	0.0537516	17	23	K2:Lac:1000.00	1.22297	Y	not in TF Database
Q15651	High mobility group nucleosome-binding domain-containing protein 3 OS=Homo sapiens OX=9606 GN=HMGN3 PE=1 SV=2	VTK(*)QEPTR	Y	0.944882	0.424015	18	25	K3:Lac:1000.00	1.35606	Y	Likely to be sequence specific TF
P05114	Non-histone chromosomal protein HMG-14 OS=Homo sapiens OX=9606 GN=HMGN1 PE=1 SV=3	VSSAEGAAK(*)EEPK	Y	0.158216	0.0429348	6	18	K9:Lac:25.70	1.11429	Y	Unlikely to be sequence specific TF
P19338	Nucleolin OS=Homo sapiens OX=9606 GN=NCL PE=1 SV=3	GATPGK(*)ALVATPGK	Y	0.211071	0.030057	111	124	K6:Lac:75.74	1.64865	Y	not in TF Database
P16402	Histone H1.3 OS=Homo sapiens OX=9606 GN=HIST1H1D PE=1 SV=2	VK(*)TPQPK	Y	0.798669	0.180662	178	184	K2:Lac:56.99	1.09722	Y
P68431	Histone H3.1 OS=Homo sapiens OX=9606 GN=HIST1H3A PE=1 SV=2	EIAQDFK(*)TDLR	Y	0	0	74	84	K7:Lac:1000.00	can't be normalized to protein abundance ratio	N
Q71DI3	Histone H3.2 OS=Homo sapiens OX=9606 GN=HIST2H3A PE=1 SV=3	EIAQDFK(*)TDLR	Y	0	0	74	84	K7:Lac:1000.00	can't be normalized to protein abundance ratio	N
Q71UI9	Histone H2A.V OS=Homo sapiens OX=9606 GN=H2AFV PE=1 SV=3	ATIAGGGVIPHIHK(*)SLIGK	Y	0	0	103	121	K14:Lac:30.64	1.30994	N(cycIm=0)
P0C0S5	Histone H2A.Z OS=Homo sapiens OX=9606 GN=H2AFZ PE=1 SV=2	ATIAGGGVIPHIHK(*)SLIGK	Y	0	0	103	121	K14:Lac:30.64	1.30994	N(cycIm=0)
P53999	Activated RNA polymerase II transcriptional coactivator p15 OS=Homo sapiens OX=9606 GN=SUB1 PE=1 SV=3	ALSSSK(*)QSSSSR	Y	0.225087	0.0481052	48	59	K6:Lac:1000.00	1.35644	Y	ssDNA/RNA binding
P05114	Non-histone chromosomal protein HMG-14 OS=Homo sapiens OX=9606 GN=HMGN1 PE=1 SV=3	LSAK(*)PPAK	Y	0.214474	0.23444	24	31	K4:Lac:25.70	0.928571	Y	Unlikely to be sequence specific TF
Q96I25	Splicing factor 45 OS=Homo sapiens OX=9606 GN=RBM17 PE=1 SV=1	AALTQAK(*)SQR	Y	0.132488	0.0419872	35	44	K7:Lac:1000.00	1.5125	Y	not in TF Database
P19338	Nucleolin OS=Homo sapiens OX=9606 GN=NCL PE=1 SV=3	AAK(*)VVPVK	Y	0.789218	0.15422	221	228	K3:Lac:79.02	1.25676	Y	not in TF Database
P04075	Fructose-bisphosphate aldolase A OS=Homo sapiens OX=9606 GN=ALDOA PE=1 SV=2	KDGADFAK(*)WR	Y	0.498424	0.0306382	140	149	K8:Lac:85.08	0.275862	Y	not in TF Database
Q09666	Neuroblast differentiation-associated protein AHNAK OS=Homo sapiens OX=9606 GN=AHNAK PE=1 SV=2	VPK(*)FSVSGAK	Y	0.320323	0	436	445	K3:Lac:31.93	0.84375	Y	not in TF Database
P42166	Lamina-associated polypeptide 2 isoform alpha OS=Homo sapiens OX=9606 GN=TMPO PE=1 SV=2	GQLQK(*)LASER	Y	0.562364	0.154446	265	274	K5:Lac:1000.00	0.933333	Y	not in TF Database
Q9BQ61	Telomerase RNA component interacting RNase OS=Homo sapiens OX=9606 GN=TRIR PE=1 SV=1	GGNK(*)LALK	Y	1	0	121	128	K4:Lac:51.96	1.43158	Y	not in TF Database
P78347	General transcription factor II-I OS=Homo sapiens OX=9606 GN=GTF2I PE=1 SV=2	EFNFEK(*)WNAR	Y	0.500932	0	348	357	K6:Lac:1000.00	3	Y	Known motif
P42167	Lamina-associated polypeptide 2 isoforms beta/gamma OS=Homo sapiens OX=9606 GN=TMPO PE=1 SV=2	TPVTLK(*)QR	Y	0.190274	0.0895147	208	215	K6:Lac:1000.00	can't be normalized to protein abundance ratio	N	not in TF Database
P62979	Ubiquitin-40S ribosomal protein S27a OS=Homo sapiens OX=9606 GN=RPS27A PE=1 SV=2	LAVLK(*)YYK	Y	0.648501	0.294995	100	107	K5:Lac:22.45	can't be normalized to protein abundance ratio	N	ssDNA/RNA binding
Q13442	28 kDa heat- and acid-stable phosphoprotein OS=Homo sapiens OX=9606 GN=PDAP1 PE=1 SV=1	TEQAK(*)ADLAR	Y	0.614893	0	133	142	K5:Lac:1000.00	1.59091	Y	not in TF Database
Q8NDX5	Polyhomeotic-like protein 3 OS=Homo sapiens OX=9606 GN=PHC3 PE=1 SV=1	TTVTSSK(*)ISQR	Y	0.0947629	0.107795	250	260	K7:Lac:1000.00	3.46154	Y	not in TF Database
Note: BP, base peak ; cycIm, the “cyclic” immonium ion ; linIm, the “linear” immonium ion; TF, Transcription factors

## Sheet: DCA
		Summary of the identified lactylated peptides from SILAC-processed and affinity-enriched proteome datasets collected from MCF-7 cells in response to DCA intervention.
Protein Accession	Protein description	Peptide	Unique	cycIm/BP	linIm/BP	Start	End	AScore	Ratio after normalization	Quantify(Yes/No)	TF
P68431	Histone H3.1 OS=Homo sapiens OX=9606 GN=HIST1H3A PE=1 SV=2	KQLATK(*)AAR	Y	0.831322	0.026	19	27	K6:Lac:87.95	0.804348	Y
Q71DI3	Histone H3.2 OS=Homo sapiens OX=9606 GN=HIST2H3A PE=1 SV=3	KQLATK(*)AAR	Y	0.831322	0.026	19	27	K6:Lac:87.95	0.804348	Y
P84243	Histone H3.3 OS=Homo sapiens OX=9606 GN=H3F3A PE=1 SV=2	KQLATK(*)AAR	Y	0.831322	0.026	19	27	K6:Lac:87.95	can't be normalized to protein abundance ratio	N
P58876	Histone H2B type 1-D OS=Homo sapiens OX=9606 GN=HIST1H2BD PE=1 SV=2	PEPTK(*)SAPAPK	Y	0.095846	0.0141758	2	12	K5:Lac:62.39	0.821053	Y
Q99880	Histone H2B type 1-L OS=Homo sapiens OX=9606 GN=HIST1H2BL PE=1 SV=3	PELAK(*)SAPAPK	Y	0.218097	0.0636602	2	12	K5:Lac:77.93	can't be normalized to protein abundance ratio	N
P62805	Histone H4 OS=Homo sapiens OX=9606 GN=HIST1H4A PE=1 SV=2	GLGK(*)GGAK	Y	0.314322	0.0665194	10	17	K4:Lac:34.30	0.549451	Y
P62805	Histone H4 OS=Homo sapiens OX=9606 GN=HIST1H4A PE=1 SV=2	GGK(*)GLGK	Y	1	0.0624569	7	13	K3:Lac:64.94	0.626374	Y
P68431	Histone H3.1 OS=Homo sapiens OX=9606 GN=HIST1H3A PE=1 SV=2	QLATK(*)AAR	Y	0.200053	0.0346894	20	27	K5:Lac:1000.00	0.847826	Y
Q71DI3	Histone H3.2 OS=Homo sapiens OX=9606 GN=HIST2H3A PE=1 SV=3	QLATK(*)AAR	Y	0.200053	0.0346894	20	27	K5:Lac:1000.00	0.847826	Y
P84243	Histone H3.3 OS=Homo sapiens OX=9606 GN=H3F3A PE=1 SV=2	QLATK(*)AAR	Y	0.200053	0.0346894	20	27	K5:Lac:1000.00	can't be normalized to protein abundance ratio	N
Q99879	Histone H2B type 1-M OS=Homo sapiens OX=9606 GN=HIST1H2BM PE=1 SV=3	PEPVK(*)SAPVPK	Y	0.157317	0.0617918	2	12	K5:Lac:63.05	0.884211	Y
P62805	Histone H4 OS=Homo sapiens OX=9606 GN=HIST1H4A PE=1 SV=2	G(+42.01)GKGLGK(*)GGAK	Y	0.319244	0.0215022	7	17	G1:Acetylation (Protein N-term):1000.00;K7:Lac:31.27	0.703297	Y
P04075	Fructose-bisphosphate aldolase A OS=Homo sapiens OX=9606 GN=ALDOA PE=1 SV=2	DGADFAK(*)WR	Y	0.177332	0.0225451	141	149	K7:Lac:1000.00	1.10227	Y	not in TF Database
P09972	Fructose-bisphosphate aldolase C OS=Homo sapiens OX=9606 GN=ALDOC PE=1 SV=2	DGADFAK(*)WR	Y	0.177332	0.0225451	141	149	K7:Lac:1000.00	can't be normalized to protein abundance ratio	N	not in TF Database
Q5QNW6	Histone H2B type 2-F OS=Homo sapiens OX=9606 GN=HIST2H2BF PE=1 SV=3	KAVTK(*)VQK	Y	0.268699	0.0616713	17	24	K5:Lac:73.31	0.831579	Y
P62805	Histone H4 OS=Homo sapiens OX=9606 GN=HIST1H4A PE=1 SV=2	GKGGK(*)GLGK	Y	0.12763	0.0309418	5	13	K5:Lac:28.36	0.010989	Y
P05114	Non-histone chromosomal protein HMG-14 OS=Homo sapiens OX=9606 GN=HMGN1 PE=1 SV=3	LSAKPPAK(*)VEAK	Y	0.0845457	0.0999464	24	35	K8:Lac:49.79	0.784946	Y	Unlikely to be sequence specific TF
P05114	Non-histone chromosomal protein HMG-14 OS=Homo sapiens OX=9606 GN=HMGN1 PE=1 SV=3	LSAKPPAK(*)VEAKPK	Y	0.192319	0.152759	24	37	K8:Lac:43.09	0.763441	Y	Unlikely to be sequence specific TF
P05204	Non-histone chromosomal protein HMG-17 OS=Homo sapiens OX=9606 GN=HMGN2 PE=1 SV=3	KGEK(*)VPK	Y	0.307209	0.0647555	48	54	K4:Lac:48.45	0.737374	Y	not in TF Database
P19338	Nucleolin OS=Homo sapiens OX=9606 GN=NCL PE=1 SV=3	TVTPAK(*)AVTTPGK	Y	0.0842727	0.882266	97	109	K6:Lac:81.81	0.556962	Y	not in TF Database
Q5QNW6	Histone H2B type 2-F OS=Homo sapiens OX=9606 GN=HIST2H2BF PE=1 SV=3	AVTK(*)VQK	Y	0.367026	0.0823026	18	24	K4:Lac:22.34	0.894737	Y
P19338	Nucleolin OS=Homo sapiens OX=9606 GN=NCL PE=1 SV=3	GATPGK(*)ALVATPGK	Y	0.176916	0.0347912	111	124	K6:Lac:78.75	0.594937	Y	not in TF Database
P09429	High mobility group protein B1 OS=Homo sapiens OX=9606 GN=HMGB1 PE=1 SV=3	TYIPPK(*)GETK	Y	0.0275552	0.00621201	77	86	K6:Lac:25.11	0.857143	Y	Unlikely to be sequence specific TF
P68431	Histone H3.1 OS=Homo sapiens OX=9606 GN=HIST1H3A PE=1 SV=2	STGGK(*)APR	Y	0.15443	0.0168747	11	18	K5:Lac:1000.00	0.695652	Y
Q71DI3	Histone H3.2 OS=Homo sapiens OX=9606 GN=HIST2H3A PE=1 SV=3	STGGK(*)APR	Y	0.15443	0.0168747	11	18	K5:Lac:1000.00	0.695652	Y
P84243	Histone H3.3 OS=Homo sapiens OX=9606 GN=H3F3A PE=1 SV=2	STGGK(*)APR	Y	0.15443	0.0168747	11	18	K5:Lac:1000.00	can't be normalized to protein abundance ratio	N
P05114	Non-histone chromosomal protein HMG-14 OS=Homo sapiens OX=9606 GN=HMGN1 PE=1 SV=3	GK(*)QAEVANQETK	Y	1	0.0357346	60	71	K2:Lac:103.28	0.72043	Y	Unlikely to be sequence specific TF
O60869	Endothelial differentiation-related factor 1 OS=Homo sapiens OX=9606 GN=EDF1 PE=1 SV=1	SK(*)QAILAAQR	Y	1	0	24	33	K2:Lac:1000.00	0.654412	Y	Unlikely to be sequence specific TF
P06748	Nucleophosmin OS=Homo sapiens OX=9606 GN=NPM1 PE=1 SV=2	SK(*)GQESFK	Y	1	0.0155509	222	229	K2:Lac:77.93	0.766667	Y	Unlikely to be sequence specific TF
Q8N257	Histone H2B type 3-B OS=Homo sapiens OX=9606 GN=HIST3H2BB PE=1 SV=3	PDPSK(*)SAPAPK	Y	0.15903	0.0358379	2	12	K5:Lac:42.22	can't be normalized to protein abundance ratio	N
P09429	High mobility group protein B1 OS=Homo sapiens OX=9606 GN=HMGB1 PE=1 SV=3	FK(*)DPNAPK	Y	0.799612	0.10882	89	96	K2:Lac:41.57	0.865079	Y	Unlikely to be sequence specific TF
P19338	Nucleolin OS=Homo sapiens OX=9606 GN=NCL PE=1 SV=3	TVTPAK(*)AVTTPGKK	Y	0.308922	1	97	110	K6:Lac:67.12	0.64557	Y	not in TF Database
P21291	Cysteine and glycine-rich protein 1 OS=Homo sapiens OX=9606 GN=CSRP1 PE=1 SV=3	FAQK(*)IGGSER	Y	0.416906	0.0620744	109	118	K4:Lac:1000.00	0.719424	Y	not in TF Database
P09429	High mobility group protein B1 OS=Homo sapiens OX=9606 GN=HMGB1 PE=1 SV=3	KGVVK(*)AEK	Y	0.416054	0.140424	173	180	K5:Lac:45.70	0.984127	Y	Unlikely to be sequence specific TF
P06748	Nucleophosmin OS=Homo sapiens OX=9606 GN=NPM1 PE=1 SV=2	TPK(*)GPSSVEDIK	Y	1	0.217597	237	248	K3:Lac:90.94	0.8	Y	Unlikely to be sequence specific TF
P04075	Fructose-bisphosphate aldolase A OS=Homo sapiens OX=9606 GN=ALDOA PE=1 SV=2	KDGADFAK(*)WR	Y	0.56437	0.0473647	140	149	K8:Lac:82.17	1.23864	Y	not in TF Database
P09972	Fructose-bisphosphate aldolase C OS=Homo sapiens OX=9606 GN=ALDOC PE=1 SV=2	KDGADFAK(*)WR	Y	0.56437	0.0473647	140	149	K8:Lac:82.17	can't be normalized to protein abundance ratio	N	not in TF Database
Q99879	Histone H2B type 1-M OS=Homo sapiens OX=9606 GN=HIST1H2BM PE=1 SV=3	AINK(*)AQK	Y	0.219917	0.0277111	18	24	K4:Lac:34.94	0.905263	Y
P68431	Histone H3.1 OS=Homo sapiens OX=9606 GN=HIST1H3A PE=1 SV=2	EIAQDFK(*)TDLR	Y	0	0	74	84	K7:Lac:1000.00	0.858696	N(cycIm=0)
Q71DI3	Histone H3.2 OS=Homo sapiens OX=9606 GN=HIST2H3A PE=1 SV=3	EIAQDFK(*)TDLR	Y	0	0	74	84	K7:Lac:1000.00	0.858696	N(cycIm=0)
P84243	Histone H3.3 OS=Homo sapiens OX=9606 GN=H3F3A PE=1 SV=2	EIAQDFK(*)TDLR	Y	#N/A	0	74	84	K7:Lac:1000.00	can't be normalized to protein abundance ratio	N
P05204	Non-histone chromosomal protein HMG-17 OS=Homo sapiens OX=9606 GN=HMGN2 PE=1 SV=3	TDQAQK(*)AEGAGDAK	Y	0.270381	0	77	90	K6:Lac:47.82	0.757576	Y	not in TF Database
Q13185	Chromobox protein homolog 3 OS=Homo sapiens OX=9606 GN=CBX3 PE=1 SV=4	TTLQK(*)MGK	Y	0	0.247892	6	13	K5:Lac:22.45	0.415254	N(cycIm=0)
Q15651	High mobility group nucleosome-binding domain-containing protein 3 OS=Homo sapiens OX=9606 GN=HMGN3 PE=1 SV=2	KEPGAK(*)ISR	Y	0.0540671	0.0211587	50	58	K6:Lac:86.16	0.661157	Y	Likely to be sequence specific TF
Q99879	Histone H2B type 1-M OS=Homo sapiens OX=9606 GN=HIST1H2BM PE=1 SV=3	KAINK(*)AQK	Y	0.251349	0.0281099	17	24	K5:Lac:49.37	0.821053	Y
P16403	Histone H1.2 OS=Homo sapiens OX=9606 GN=HIST1H1C PE=1 SV=2	SAAK(*)AVKPK	Y	1	0.129361	188	196	K4:Lac:22.45	0.95122	Y
Q15651	High mobility group nucleosome-binding domain-containing protein 3 OS=Homo sapiens OX=9606 GN=HMGN3 PE=1 SV=2	VTK(*)QEPTR	Y	0.852088	0.472664	18	25	K3:Lac:1000.00	0.553719	Y	Likely to be sequence specific TF
P17096	High mobility group protein HMG-I/HMG-Y OS=Homo sapiens OX=9606 GN=HMGA1 PE=1 SV=3	S(+42.01)ESSSK(*)SSQPLASK	Y	0.404367	0	2	15	S1:Acetylation (Protein N-term):1000.00;K6:Lac:49.35	1.01042	Y	Known motif
P06748	Nucleophosmin OS=Homo sapiens OX=9606 GN=NPM1 PE=1 SV=2	DTPAK(*)NAQK	Y	0.290298	0.0471905	198	206	K5:Lac:20.17	1.04444	Y	Unlikely to be sequence specific TF
P07910	Heterogeneous nuclear ribonucleoproteins C1/C2 OS=Homo sapiens OX=9606 GN=HNRNPC PE=1 SV=4	SGFNSK(*)SGQR	Y	0.172687	0	171	180	K6:Lac:1000.00	0.756098	Y	not in TF Database
P06748	Nucleophosmin OS=Homo sapiens OX=9606 GN=NPM1 PE=1 SV=2	LLSISGK(*)R	Y	0.0636262	0.115371	135	142	K7:Lac:1000.00	1.04444	Y	Unlikely to be sequence specific TF
P05114	Non-histone chromosomal protein HMG-14 OS=Homo sapiens OX=9606 GN=HMGN1 PE=1 SV=3	LSAK(*)PPAK	Y	0.241608	0.177974	24	31	K4:Lac:25.70	0.784946	Y	Unlikely to be sequence specific TF
P19338	Nucleolin OS=Homo sapiens OX=9606 GN=NCL PE=1 SV=3	AAK(*)VVPVK	Y	0.746016	0.157126	221	228	K3:Lac:61.30	0.911392	Y	not in TF Database
Q9BQ61	Telomerase RNA component interacting RNase OS=Homo sapiens OX=9606 GN=TRIR PE=1 SV=1	LALK(*)TGIVAK	Y	0.834768	0.166377	125	134	K4:Lac:45.03	0.495238	Y	not in TF Database
P61978	Heterogeneous nuclear ribonucleoprotein K OS=Homo sapiens OX=9606 GN=HNRNPK PE=1 SV=1	DLAGSIIGK(*)GGQR	Y	0	0	397	409	K9:Lac:1000.00	1.23158	N(cycIm=0)
P53999	Activated RNA polymerase II transcriptional coactivator p15 OS=Homo sapiens OX=9606 GN=SUB1 PE=1 SV=3	ALSSSK(*)QSSSSR	Y	0.326059	0	48	59	K6:Lac:1000.00	0.691489	Y	ssDNA/RNA binding
Q9H1E3	Nuclear ubiquitous casein and cyclin-dependent kinase substrate 1 OS=Homo sapiens OX=9606 GN=NUCKS1 PE=1 SV=1	LK(*)ATVTPSPVK	Y	0.809776	0.10637	174	184	K2:Lac:72.43	0.688889	Y	Unlikely to be sequence specific TF
P16104	Histone H2AX OS=Homo sapiens OX=9606 GN=H2AFX PE=1 SV=2	KTSATVGPK(*)APSGGK	Y	0.750472	0.146967	120	134	K9:Lac:36.87	can't be normalized to protein abundance ratio	N
P16402	Histone H1.3 OS=Homo sapiens OX=9606 GN=HIST1H1D PE=1 SV=2	VK(*)TPQPK	Y	0.927226	0.113616	178	184	K2:Lac:46.87	1.04301	Y
P05114	Non-histone chromosomal protein HMG-14 OS=Homo sapiens OX=9606 GN=HMGN1 PE=1 SV=3	GK(*)QAEVANQETKEDLPAENGETK	Y	1	0	60	82	K2:Lac:29.98	0.741935	Y	Unlikely to be sequence specific TF
P19338	Nucleolin OS=Homo sapiens OX=9606 GN=NCL PE=1 SV=3	KGAAIPAK(*)GAK	Y	0.175371	0	125	135	K8:Lac:32.69	0.56962	Y	not in TF Database
P62805	Histone H4 OS=Homo sapiens OX=9606 GN=HIST1H4A PE=1 SV=2	DAVTYTEHAK(*)R	Y	0	0.15174	69	79	K10:Lac:1000.00	0.813187	N(cycIm=0)
Q01813	ATP-dependent 6-phosphofructokinase platelet type OS=Homo sapiens OX=9606 GN=PFKP PE=1 SV=2	NFGTK(*)ISAR	Y	0.215148	0.0408426	684	692	K5:Lac:1000.00	can't be normalized to protein abundance ratio	N	not in TF Database
Q7Z4V5	Hepatoma-derived growth factor-related protein 2 OS=Homo sapiens OX=9606 GN=HDGFL2 PE=1 SV=1	VLGPK(*)IEAVQK	Y	0.463183	0.131552	550	560	K5:Lac:41.94	0.58427	Y	not in TF Database
Q9Y5V0	Zinc finger protein 706 OS=Homo sapiens OX=9606 GN=ZNF706 PE=1 SV=1	GQQK(*)IQSQQK	Y	0.736633	0	4	13	K4:Lac:53.33	0.5	Y	Likely to be sequence specific TF
Q71UI9	Histone H2A.V OS=Homo sapiens OX=9606 GN=H2AFV PE=1 SV=3	IHK(*)SLIGK	Y	0	0.123396	114	121	K3:Lac:62.08	0.859813	N(cycIm=0)
P0C0S5	Histone H2A.Z OS=Homo sapiens OX=9606 GN=H2AFZ PE=1 SV=2	IHK(*)SLIGK	Y	0	0.123396	114	121	K3:Lac:62.08	0.859813	N(cycIm=0)
Q96I25	Splicing factor 45 OS=Homo sapiens OX=9606 GN=RBM17 PE=1 SV=1	AALTQAK(*)SQR	Y	0.226715	0	35	44	K7:Lac:1000.00	0.487179	Y	not in TF Database
P16403	Histone H1.2 OS=Homo sapiens OX=9606 GN=HIST1H1C PE=1 SV=2	AAKPK(*)VVKPK	Y	0.133559	0.0258915	197	206	K5:Lac:32.28	0.926829	Y
P16401	Histone H1.5 OS=Homo sapiens OX=9606 GN=HIST1H1B PE=1 SV=3	SPAKPK(*)AVKPK	Y	0.114557	0.0225675	189	199	K6:Lac:22.85	0.769231	Y
Q09666	Neuroblast differentiation-associated protein AHNAK OS=Homo sapiens OX=9606 GN=AHNAK PE=1 SV=2	MPK(*)ISMPGFK	Y	0	0.25537	2771	2780	K3:Lac:43.57	0.545455	N(cycIm=0)
P16402	Histone H1.3 OS=Homo sapiens OX=9606 GN=HIST1H1D PE=1 SV=2	KVK(*)TPQPK	Y	0.197993	0.289012	177	184	K3:Lac:54.01	1.12903	Y
Q9BQ61	Telomerase RNA component interacting RNase OS=Homo sapiens OX=9606 GN=TRIR PE=1 SV=1	GGNK(*)LALK	Y	0.640363	0	121	128	K4:Lac:34.30	0.419048	Y	not in TF Database
P06748	Nucleophosmin OS=Homo sapiens OX=9606 GN=NPM1 PE=1 SV=2	VEAK(*)FINYVK	Y	1	0	264	273	K4:Lac:23.15	1.05556	Y	Unlikely to be sequence specific TF
Q9UNZ5	Leydig cell tumor 10 kDa protein homolog OS=Homo sapiens OX=9606 GN=C19orf53 PE=1 SV=1	LALLK(*)APAK	Y	0.296574	0.10002	77	85	K5:Lac:25.11	0.00597548	Y	not in TF Database
Q13428	Treacle protein OS=Homo sapiens OX=9606 GN=TCOF1 PE=1 SV=3	PALK(*)IPQTK	Y	0.256969	0.0981523	634	642	K4:Lac:38.32	1.02174	Y	not in TF Database
Q29RF7	Sister chromatid cohesion protein PDS5 homolog A OS=Homo sapiens OX=9606 GN=PDS5A PE=1 SV=1	APK(*)LQDLAK	Y	0.8247	0.190082	1316	1324	K3:Lac:45.03	0.517857	Y	not in TF Database
P05787	Keratin type II cytoskeletal 8 OS=Homo sapiens OX=9606 GN=KRT8 PE=1 SV=7	VTQK(*)SYK	Y	0.491176	0.674955	5	11	K4:Lac:22.45	1.14286	Y	not in TF Database
Q15651	High mobility group nucleosome-binding domain-containing protein 3 OS=Homo sapiens OX=9606 GN=HMGN3 PE=1 SV=2	PAPPKPEPK(*)PR	Y	0.0891403	0	34	44	K9:Lac:34.30	0.661157	Y	Likely to be sequence specific TF
P50914	60S ribosomal protein L14 OS=Homo sapiens OX=9606 GN=RPL14 PE=1 SV=4	ATGQK(*)AAPAPK	Y	0.372728	0.105041	183	193	K5:Lac:47.92	1.025	Y	not in TF Database
P19338	Nucleolin OS=Homo sapiens OX=9606 GN=NCL PE=1 SV=3	QK(*)AAPEAK	Y	1	0.0412537	287	294	K2:Lac:49.37	1.32911	Y	not in TF Database
P50914	60S ribosomal protein L14 OS=Homo sapiens OX=9606 GN=RPL14 PE=1 SV=4	VPAQK(*)ATGQK	Y	0.296279	0	178	187	K5:Lac:30.64	0.991667	Y	not in TF Database
Q09666	Neuroblast differentiation-associated protein AHNAK OS=Homo sapiens OX=9606 GN=AHNAK PE=1 SV=2	VPK(*)FSVSGAK	Y	0.525798	0	436	445	K3:Lac:32.83	0.659091	Y	not in TF Database
Q13442	28 kDa heat- and acid-stable phosphoprotein OS=Homo sapiens OX=9606 GN=PDAP1 PE=1 SV=1	TEQAK(*)ADLAR	Y	0.470908	0.161075	133	142	K5:Lac:1000.00	0.867188	Y	not in TF Database
O60869	Endothelial differentiation-related factor 1 OS=Homo sapiens OX=9606 GN=EDF1 PE=1 SV=1	RGEDVETSK(*)K	Y	1	0.0723904	34	43	K9:Lac:33.98	0.595588	Y	Unlikely to be sequence specific TF
Q92979	Ribosomal RNA small subunit methyltransferase NEP1 OS=Homo sapiens OX=9606 GN=EMG1 PE=1 SV=4	LGAGNK(*)IGGR	Y	0	0	32	41	K6:Lac:1000.00	0.482759	N(cycIm=0)
P68431	Histone H3.1 OS=Homo sapiens OX=9606 GN=HIST1H3A PE=1 SV=2	RVTIMPK(*)DIQLAR	Y	0.417192	0	117	129	K7:Lac:1000.00	0.695652	Y
Q71DI3	Histone H3.2 OS=Homo sapiens OX=9606 GN=HIST2H3A PE=1 SV=3	RVTIMPK(*)DIQLAR	Y	0.417192	0	117	129	K7:Lac:1000.00	0.695652	Y
P84243	Histone H3.3 OS=Homo sapiens OX=9606 GN=H3F3A PE=1 SV=2	RVTIMPK(*)DIQLAR	Y	0.417192	0	117	129	K7:Lac:1000.00	can't be normalized to protein abundance ratio	N
P47914	60S ribosomal protein L29 OS=Homo sapiens OX=9606 GN=RPL29 PE=1 SV=2	MQANNAK(*)AMSAR	Y	0.229601	0.137705	57	68	K7:Lac:1000.00	1	Y	not in TF Database
P50914	60S ribosomal protein L14 OS=Homo sapiens OX=9606 GN=RPL14 PE=1 SV=4	APAQK(*)APAPK	Y	0.345626	0.167905	200	209	K5:Lac:35.03	1.075	Y	not in TF Database
P63220	40S ribosomal protein S21 OS=Homo sapiens OX=9606 GN=RPS21 PE=1 SV=1	LAK(*)ADGIVSK	Y	1	0.231235	72	81	K3:Lac:32.20	1.15625	Y	not in TF Database
P35659	Protein DEK OS=Homo sapiens OX=9606 GN=DEK PE=1 SV=1	SVK(*)SANVK	Y	0.477969	0.105876	276	283	K3:Lac:32.16	0.94898	Y	Unlikely to be sequence specific TF
O00479	High mobility group nucleosome-binding domain-containing protein 4 OS=Homo sapiens OX=9606 GN=HMGN4 PE=1 SV=3	DGNNPAK(*)NR	Y	0.171606	0	65	73	K7:Lac:1000.00	0.70297	Y	not in TF Database
Note: BP, base peak ; cycIm, the “cyclic” immonium ion ; linIm, the “linear” immonium ion; TF, Transcription factors
