# Supplementary material for: Discovery of Signature Cyclic Immonium Ion for Lactyllysine Reveals Widespread and Functional Lactylation on Non-histone Proteins
Source: Research Square preprint supplement (doi:10.21203/rs.3.rs-916390/v1), 2021-09-24
Supplement: Supplementary file 5 [file 098c2d80729355a006f1e9a1.xlsx]

## Sheet: Orbitrap-ENO1
Summary of the lactylated peptides identified from the recombinant ENO1 protein digests using an Orbitrap instrument.
Peptide	Lac modification(Yes/No)	Scan	RT	cycIm/BP	linIm/BP	Start	End	AScore
L.K(+72.02)IHAREIFDSRGNPTVEVDLF.T	Y	F3:11912	39.15	0.0315403	0.0166709	5	25	K1:Lac:1000.00
L.K(+72.02)IHAREIF.D	Y	F2:7250	25.68	0.669713	0.106367	5	12	K1:Lac:1000.00
L.K(+72.02)IHAREIFD.S	Y	F2:7329	25.91	0.189271	0.0490293	5	13	K1:Lac:1000.00
M.SILK(+72.02)IHAREIF.D	Y	F3:10309	34.48	0.270111	1	2	12	K4:Lac:1000.00
F.TSK(+72.02)GLF.R	Y	F3:10318	34.5	0.943355	0.53493	26	31	K3:Lac:1000.00
F.RAAVPSGASTGIYEALELRDNDK(+72.02)TRY.M	Y	F1:10627	35.64	0.0335818	0	32	57	K23:Lac:1000.00
Y.EALELRDNDK(+72.02)TRY.M	Y	F2:8034	27.97	0.165012	0.0211432	45	57	K10:Lac:1000.00
L.ELRDNDK(+72.02)TRY.M	Y	F2:5371	20.18	0.120003	0.051327	48	57	K7:Lac:1000.00
L.RDNDK(+72.02)TRY.M	Y	F2:3933	15.59	0	0	50	57	K5:Lac:1000.00
M.GK(+72.02)GVSKAVEHINKTIAPALVSKKL.N	Y	F1:8724	30.08	0.389994	0.0437959	59	82	K2:Lac:20.17
Y.MGK(+72.02)GVSKAVEHIN.K	Y	F1:6167	22.63	1	0.086789	58	70	K3:Lac:23.44
M.GK(+72.02)GVSK(+72.02)AVEHINK(+72.02)TIAPALVSKKL.N	Y	F3:7900	27.43	0	0	59	82	K2:Lac:55.40;K6:Lac:67.56;K13:Lac:90.01
Y.MGKGVSK(+72.02)AVEHINKTIAPALVSKKL.N	Y	F2:9486	32.21	0.143583	0.0256177	58	82	K7:Lac:22.37
Y.MGKGVSKAVEHINK(+72.02)TIAPALVSKKL.N	Y	F1:8902	30.6	0.112217	0	58	82	K14:Lac:63.15
Y.M(+15.99)GKGVSKAVEHINK(+72.02)TIAPALVSKKL.N	Y	F1:8560	29.6	0.1102	0.016655	58	82	M1:Oxidation (M):1000.00;K14:Lac:34.75
S.KAVEHINK(+72.02)TIAPALVSKKL.N	Y	F3:8160	28.19	0.325695	0.0738286	64	82	K8:Lac:40.25
N.K(+72.02)TIAPALVSKKL.N	Y	F2:8267	28.64	0.482479	0.186468	71	82	K1:Lac:95.42
K.AVEHINK(+72.02)TIAPALVSKKL.N	Y	F2:8743	30.04	0.241285	0.0439092	65	82	K7:Lac:90.01
L.NVTEQEK(+72.02)IDKL.M	Y	F3:9054	30.8	0.17299	0.0471708	83	93	K7:Lac:37.54
Q.EK(+72.02)IDKL.M	Y	F2:6988	24.92	0.271075	0	88	93	K2:Lac:91.37
L.NVTEQEKIDK(+72.02)L.M	Y	F2:8327	28.82	0.303369	0.0351491	83	93	K10:Lac:62.75
L.AVC(+57.02)K(+72.02)AGAVEKGVPL.Y	Y	F2:8806	30.22	0.189538	0.0224806	117	130	C3:Carbamidomethylation:1000.00;K4:Lac:101.67
V.C(+57.02)K(+72.02)AGAVEKGVPL.Y	Y	F1:7911	27.71	0	0	119	130	C1:Carbamidomethylation:1000.00;K2:Lac:63.05
C.K(+72.02)AGAVEKGVPL.Y	Y	F2:7671	26.91	0.581132	0.169632	120	130	K1:Lac:59.64
L.AVC(+57.02)KAGAVEK(+72.02)GVPL.Y	Y	F2:8440	29.15	0.144297	0.0160998	117	130	C3:Carbamidomethylation:1000.00;K10:Lac:62.39
L.AVC(+57.02)KAGAVEK(+72.02)GVPLY.R	Y	F3:9455	31.97	0.258934	0.099628	117	131	C3:Carbamidomethylation:1000.00;K10:Lac:62.39
A.VC(+57.02)KAGAVEK(+72.02)GVPL.Y	Y	F1:8524	29.5	0.0887879	0	118	130	C2:Carbamidomethylation:1000.00;K9:Lac:56.47
C.KAGAVEK(+72.02)GVPLY.R	Y	F2:8825	30.28	0.173287	0.0293409	120	131	K7:Lac:28.13
C.KAGAVEK(+72.02)GVPL.Y	Y	F3:8176	28.23	0.0544774	0	120	130	K7:Lac:41.57
N.VINGGSHAGNK(+72.02)LAM(+15.99)QEF.M	Y	F2:8735	30.01	0.303042	0	152	168	K11:Lac:1000.00;M14:Oxidation (M):1000.00
N.VINGGSHAGNK(+72.02)L.A	Y	F3:6274	22.7	0.297631	0.0292885	152	163	K11:Lac:1000.00
N.VINGGSHAGNK(+72.02)LAMQEF.M	Y	F3:10169	34.06	0.234274	0.0236691	152	168	K11:Lac:1000.00
Y.HNLK(+72.02)NVIKEKYGKDATNVGDEGGFAPN.I	Y	F3:9070	30.85	0.0344229	0	190	216	K4:Lac:61.69
Y.HNLK(+72.02)NVIKEKY.G	Y	F3:7095	25.08	0.129487	0	190	200	K4:Lac:76.73
L.K(+72.02)NVIKEKYGKDATNVGDEGGFAPN.I	Y	F3:7910	27.46	0.119457	0.0414475	193	216	K1:Lac:42.68
Y.HNLK(+72.02)NVIKEKYGKDATNVGDEGGFAPNIL.E	Y	F2:10669	35.68	0.156229	0.0997151	190	218	K4:Lac:49.79
Y.HNLK(+72.02)NVIKEK(+72.02)YGKDATNVGDEGGFAPN.I	Y	F1:10513	35.31	0.0798322	0.0345117	190	216	K4:Lac:61.69;K10:Lac:22.85
Y.HNLK(+72.02)NVIKEKYGKDATNVGDEGGF.A	Y	F2:9157	31.24	0.108181	0.0545596	190	213	K4:Lac:61.69
Y.HNLKNVIK(+72.02)EKYGKDATNVGDEGGFAPN.I	Y	F1:8646	29.85	0.0568687	0	190	216	K8:Lac:32.28
Y.HNLKNVIK(+72.02)EKY.G	Y	F3:6548	23.49	0	0.0775424	190	200	K8:Lac:67.96
L.KNVIK(+72.02)EKY.G	Y	F1:5143	19.53	0.710553	0.131881	193	200	K5:Lac:82.63
Y.HNLKNVIKEK(+72.02)YGKDATNVGDEGGFAPN.I	Y	F1:8763	30.2	0.0512139	0	190	216	K10:Lac:32.28
Y.HNLKNVIKEKYGK(+72.02)DATNVGDEGGFAPN.I	Y	F3:8343	28.72	0.0556118	0	190	216	K13:Lac:29.32
N.ILENK(+72.02)EGLELL.K	Y	F3:14059	45.44	0.569377	0.13597	217	227	K5:Lac:1000.00
L.ENK(+72.02)EGLELL.K	Y	F2:12298	40.44	0	0.102226	219	227	K3:Lac:1000.00
N.ILENK(+72.02)EGLEL.L	Y	F3:12194	39.98	0.280171	0.0518313	217	226	K5:Lac:1000.00
L.K(+72.02)TAIGKAGY.T	Y	F3:6141	22.31	1	0.140216	228	236	K1:Lac:58.00
L.K(+72.02)TAIGKAGYTDKVVIGMDVAASEFF.R	Y	F1:14162	45.99	0.461456	0.135479	228	252	K1:Lac:41.87
L.LK(+72.02)TAIGKAGYTDKVVIGMDVAASEF.F	Y	F2:12785	41.87	0.902368	0	227	251	K2:Lac:23.70
L.KTAIGKAGYTDK(+72.02)VVIGMDVAASEFF.R	Y	F3:15219	48.94	0.240039	0.0285174	228	252	K12:Lac:23.15
L.KTAIGKAGYTDK(+72.02)VVIGMDVAASEF.F	Y	F3:13400	43.5	0.266403	0.0376583	228	251	K12:Lac:41.94
F.RSGK(+72.02)YDLDFKSPDDPSRY.I	Y	F2:9002	30.79	0	0	253	270	K4:Lac:129.72
F.RSGK(+72.02)YDLDFK(+72.02)SPDDPSRY.I	Y	F2:10200	34.3	0.736098	0.226474	253	270	K4:Lac:1000.00;K10:Lac:1000.00
F.RSGKYDLDFK(+72.02)SPDDPSRY.I	Y	F3:8923	30.42	0.35359	0.0264184	253	270	K10:Lac:156.85
Y.DLDFK(+72.02)SPDDPSRY.I	Y	F1:10676	35.79	0.28973	0.0412513	258	270	K5:Lac:1000.00
F.TASAGIQVVGDDLTVTNPKRIAK(+72.02)AVNEKSC(+57.02)NC(+57.02)L.L	Y	F3:10839	36.02	0	0.0225852	308	340	K23:Lac:28.70;C30:Carbamidomethylation:1000.00;C32:Carbamidomethylation:1000.00
A.K(+72.02)AVNEKSC(+57.02)NC(+57.02)L.L	Y	F1:5878	21.8	1	0.285853	330	340	K1:Lac:103.33;C8:Carbamidomethylation:1000.00;C10:Carbamidomethylation:1000.00
F.TASAGIQVVGDDLTVTNPKRIAKAVNEK(+72.02)SC(+57.02)NC(+57.02).L	Y	F1:9183	31.42	0	0.0131804	308	339	K28:Lac:76.17;C30:Carbamidomethylation:1000.00;C32:Carbamidomethylation:1000.00
F.TASAGIQVVGDDLTVTNPKRIAKAVNEK(+72.02)SC(+57.02)NC(+57.02)L.L	Y	F3:10165	34.05	0	0.201541	308	340	K28:Lac:76.17;C30:Carbamidomethylation:1000.00;C32:Carbamidomethylation:1000.00
K.RIAKAVNEK(+72.02)SC(+57.02)NC(+57.02)L.L	Y	F2:6292	22.91	0.814435	0	327	340	K9:Lac:61.30;C11:Carbamidomethylation:1000.00;C13:Carbamidomethylation:1000.00
F.TASAGIQVVGDDLTVTNPKRIAKAVNEK(+72.02)SC(+57.02)N.C	Y	F1:10328	34.76	0.242547	0.12561	308	338	K28:Lac:38.32;C30:Carbamidomethylation:1000.00
L.LK(+72.02)VNQIGSVTESLQAC(+57.02)KL.A	Y	F3:12273	40.21	0.224346	0.092338	342	359	K2:Lac:223.33;C16:Carbamidomethylation:1000.00
L.LLK(+72.02)VNQIGSVTESLQAC(+57.02)KL.A	Y	F3:13175	42.85	0.377302	0.227541	341	359	K3:Lac:182.30;C17:Carbamidomethylation:1000.00
L.K(+72.02)VNQIGSVTESLQAC(+57.02)KL.A	Y	F3:11166	36.98	0.860189	0.314169	343	359	K1:Lac:156.05;C15:Carbamidomethylation:1000.00
L.K(+72.02)VNQIGSVTESLQAC(+57.02).K	Y	F1:10755	36.01	0.359296	0.290616	343	357	K1:Lac:1000.00;C15:Carbamidomethylation:1000.00
L.LK(+72.02)VNQIGSVTESL.Q	Y	F1:12471	41.03	0.42775	0.265772	342	354	K2:Lac:1000.00
L.LK(+72.02)VNQIGSVTESLQAC(+57.02).K	Y	F2:12119	39.92	0.353736	0.190749	342	357	K2:Lac:1000.00;C16:Carbamidomethylation:1000.00
L.LLK(+72.02)VNQIGSVTESL.Q	Y	F3:13617	44.14	0.700186	0.486628	341	354	K3:Lac:1000.00
L.K(+72.02)VNQIGSVTESL.Q	Y	F3:10875	36.13	0.564309	0.570518	343	354	K1:Lac:1000.00
L.LLK(+72.02)VNQIGSVTESLQAC(+57.02).K	Y	F1:13113	42.93	0.53326	0.33077	341	357	K3:Lac:1000.00;C17:Carbamidomethylation:1000.00
L.LK(+72.02)VNQIGSVTESLQAC(+57.02)KLAQANGW.G	Y	F3:13651	44.25	0.528112	0.204515	342	365	K2:Lac:63.16;C16:Carbamidomethylation:1000.00
L.K(+72.02)VNQIGSVTESLQ.A	Y	F1:10293	34.66	0.331816	0.448489	343	355	K1:Lac:1000.00
L.LLK(+72.02)VNQIGSVTESLQ.A	Y	F3:12959	42.22	0.527249	0.339298	341	355	K3:Lac:1000.00
L.LK(+72.02)VNQIGSVTESLQ.A	Y	F2:11711	38.72	0.299844	0.209021	342	355	K2:Lac:1000.00
L.LLK(+72.02)VNQIGSVTESLQAC(+57.02)K(+72.02)L.A	Y	F3:13571	44.01	0.439015	0.373401	341	359	K3:Lac:1000.00;C17:Carbamidomethylation:1000.00;K18:Lac:1000.00
L.LK(+72.02)VNQIGSVTESLQAC(+57.02)K(+72.02)L.A	Y	F2:12722	41.68	0.509582	0	342	359	K2:Lac:1000.00;C16:Carbamidomethylation:1000.00;K17:Lac:1000.00
L.LKVNQIGSVTESLQAC(+57.02)K(+72.02)L.A	Y	F1:11394	37.88	1	0.163442	342	359	C16:Carbamidomethylation:1000.00;K17:Lac:148.55
L.LLKVNQIGSVTESLQAC(+57.02)K(+72.02)L.A	Y	F3:12461	40.76	1	0.179384	341	359	C17:Carbamidomethylation:1000.00;K18:Lac:182.33
L.KVNQIGSVTESLQAC(+57.02)K(+72.02)L.A	Y	F2:10842	36.18	1	0.169597	343	359	C15:Carbamidomethylation:1000.00;K16:Lac:133.81
A.C(+57.02)K(+72.02)LAQANGW.G	Y	F1:10556	35.44	0	1	357	365	C1:Carbamidomethylation:1000.00;K2:Lac:1000.00
F.IADLVVGLC(+57.02)TGQIK(+72.02)TGAPC(+57.02)RSERLAKY.N	Y	F2:10385	34.84	0.0398697	0.0403578	381	407	C9:Carbamidomethylation:1000.00;K14:Lac:29.09;C19:Carbamidomethylation:1000.00
C.TGQIK(+72.02)TGAPC(+57.02)RSERLAKY.N	Y	F1:5996	22.15	0.289745	0.0503632	390	407	K5:Lac:77.60;C10:Carbamidomethylation:1000.00
L.C(+57.02)TGQIK(+72.02)TGAPC(+57.02)RSERLAKY.N	Y	F3:6680	23.88	0.098712	0.0332591	389	407	C1:Carbamidomethylation:1000.00;K6:Lac:59.25;C11:Carbamidomethylation:1000.00
L.C(+57.02)TGQIK(+72.02)TGAPC(+57.02)RSERLAK(+72.02)Y.N	Y	F3:7945	27.56	0.166355	0.0309709	389	407	C1:Carbamidomethylation:1000.00;K6:Lac:1000.00;C11:Carbamidomethylation:1000.00;K18:Lac:1000.00
L.C(+57.02)TGQIK(+72.02)TGAPC(+57.02)RSERL.A	Y	F3:6688	23.9	0.10368	0.0184559	389	404	C1:Carbamidomethylation:1000.00;K6:Lac:1000.00;C11:Carbamidomethylation:1000.00
C.TGQIK(+72.02)TGAPC(+57.02)RSERL.A	Y	F3:6491	23.33	0.0809226	0.0163706	390	404	K5:Lac:1000.00;C10:Carbamidomethylation:1000.00
C.TGQIK(+72.02)TGAPC(+57.02)RSERLAK(+72.02)Y.N	Y	F1:6528	23.69	0.197852	0.0285982	390	407	K5:Lac:1000.00;C10:Carbamidomethylation:1000.00;K17:Lac:1000.00
L.C(+57.02)TGQIK(+72.02)TGAPC(+57.02)RSERLA.K	Y	F2:5219	19.74	0	0.0119678	389	405	C1:Carbamidomethylation:1000.00;K6:Lac:1000.00;C11:Carbamidomethylation:1000.00
L.C(+57.02)TGQIK(+72.02)TGAPC(+57.02)RSE.R	Y	F2:4793	18.51	0	0	389	402	C1:Carbamidomethylation:1000.00;K6:Lac:1000.00;C11:Carbamidomethylation:1000.00
T.GQIK(+72.02)TGAPC(+57.02)RSERL.A	Y	F1:4937	18.9	0.0946604	0	391	404	K4:Lac:1000.00;C9:Carbamidomethylation:1000.00
L.C(+57.02)TGQIKTGAPC(+57.02)RSERLAK(+72.02)Y.N	Y	F2:6505	23.52	0.0362188	0	389	407	C1:Carbamidomethylation:1000.00;C11:Carbamidomethylation:1000.00;K18:Lac:69.89
C.TGQIKTGAPC(+57.02)RSERLAK(+72.02)Y.N	Y	F3:6399	23.06	0.0557783	0	390	407	C10:Carbamidomethylation:1000.00;K17:Lac:119.64
C.RSERLAK(+72.02)Y.N	Y	F1:4959	18.97	0.851765	0.0781552	400	407	K7:Lac:1000.00
K.TGAPC(+57.02)RSERLAK(+72.02)Y.N	Y	F3:6270	22.69	0.0737603	0	395	407	C5:Carbamidomethylation:1000.00;K12:Lac:1000.00
Y.NQLLRIEEELGSK(+72.02)AKF.A	Y	F3:13220	42.98	0.600986	0.0692054	408	423	K13:Lac:60.92
Y.NQLLRIEEELGSK(+72.02)AK(+72.02)F.A	Y	F3:14509	46.75	1	0.0743168	408	423	K13:Lac:1000.00;K15:Lac:1000.00
L.RIEEELGSK(+72.02)AKF.A	Y	F3:8801	30.06	0.141434	0.0309606	412	423	K9:Lac:60.92
L.RIEEELGSK(+72.02)AK(+72.02)F.A	Y	F2:10182	34.24	1	0.123577	412	423	K9:Lac:1000.00;K11:Lac:1000.00
Y.NQLLRIEEELGSKAK(+72.02)F.A	Y	F3:12512	40.91	0.484372	0.0485386	408	423	K15:Lac:55.92
L.RIEEELGSKAK(+72.02)F.A	Y	F3:8438	29	0.140703	0.012496	412	423	K11:Lac:55.92
Y.MGKGVSKAVEHINKTIAPALVSKKL.N	N	F3:19156	65.19	0	0	58	82
Y.MGKGVSKAVEHINKTIAPALVSKKLNVTEQEKIDKL.M	N	F1:8900	30.6	0	0	58	93
F.RAAVPSGASTGIYEALELRDNDKTRY.M	N	F1:9272	31.68	0	0	32	57
Y.RHIADLAGNSEVILPVPAFNVINGGSHAGNKL.A	N	F2:11509	38.13	0	0	132	163
L.YRHIADLAGNSEVILPVPAFNVINGGSHAGNKL.A	N	F1:11323	37.67	0	0	131	163
L.KTAIGKAGYTDKVVIGMDVAASEFFRSGKY.D	N	F2:12123	39.93	0	0	228	257
L.YRHIADLAGNSEVILPVPAFNVINGGSHAGN.K	N	F2:12427	40.82	0	0	131	161
Y.RHIADLAGNSEVILPVPAFNVINGGSHAGNKLAMQEF.M	N	F2:12901	42.21	0	0	132	168
Y.RHIADLAGNSEVILPVPAFNVINGGSHAGN.K	N	F3:12182	39.95	0	0	132	161
L.LKVNQIGSVTESLQAC(+57.02)KLAQANGW.G	N	F3:12031	39.5	0	0.11833	342	365
F.TASAGIQVVGDDLTVTNPKRIAKAVNEKSC(+57.02)NC(+57.02)L.L	N	F1:10171	34.3	0	0.0152974	308	340	C30:Carbamidomethylation:1000.00;C32:Carbamidomethylation:1000.00
Y.HNLKNVIKEKYGKDATNVGDEGGFAPNIL.E	N	F3:9302	31.52	0	0	190	218
L.KVNQIGSVTESLQAC(+57.02)KL.A	N	F3:9630	32.49	0	0.0398221	343	359	C15:Carbamidomethylation:1000.00
Y.M(+15.99)GKGVSKAVEHINKTIAPALVSKKL.N	N	F1:7463	26.4	0	0	58	82	M1:Oxidation (M):1000.00
L.KTAIGKAGYTDKVVIGMDVAASEFF.R	N	F1:12743	41.83	0	0	228	252
L.LLKVNQIGSVTESLQAC(+57.02)KL.A	N	F3:11038	36.61	0	0.0313605	341	359	C17:Carbamidomethylation:1000.00
L.KTAIGKAGYTDKVVIGMDVAASEF.F	N	F3:10803	35.92	0	0	228	251
Y.RHIADLAGNSEVILPVPAFNVINGGSH.A	N	F3:12456	40.74	0	0.0147687	132	158
L.KIHAREIFDSRGNPTVEVDLF.T	N	F3:10554	35.2	0	0	5	25
F.RAAVPSGASTGIYEALELRD.N	N	F2:10853	36.21	0.134644	0.0854977	32	51
L.AGNSEVILPVPAFNVINGGSHAGN.K	N	F2:13370	43.59	0.0653709	0.0675841	138	161
L.YRHIADLAGNSEVILPVPAFNVINGGSH.A	N	F1:12686	41.66	0	0	131	158
L.LKVNQIGSVTESLQAC(+57.02)KL.A	N	F3:10489	35.01	0	0.0434426	342	359	C16:Carbamidomethylation:1000.00
L.NVTEQEKIDKLMIEMDGTENKSKF.G	N	F3:10396	34.73	0	0	83	106
Y.HNLKNVIKEKYGKDATNVGDEGGF.A	N	F1:7440	26.34	0	0	190	213
L.YRHIADLAGNSEVILPVPAF.N	N	F1:12899	42.29	0	0	131	150
F.RSGKYDLDFKSPDDPSRY.I	N	F3:7809	27.16	0	0	253	270
L.C(+57.02)TGQIKTGAPC(+57.02)RSERLAKY.N	N	F3:5404	20.16	0	0	389	407	C1:Carbamidomethylation:1000.00;C11:Carbamidomethylation:1000.00
F.TASAGIQVVGDDLTVTNPKRIAKAVNEKSC(+57.02)NC(+57.02).L	N	F1:9133	31.27	0	0.0169655	308	339	C30:Carbamidomethylation:1000.00;C32:Carbamidomethylation:1000.00
L.KTAIGKAGYTDKVVIGM(+15.99)DVAASEFF.R	N	F2:10937	36.46	0	0	228	252	M17:Oxidation (M):1000.00
Y.NQLLRIEEELGSKAKF.A	N	F2:11182	37.18	0	0	408	423
H.INKTIAPALVSKKLNVTEQEKIDKL.M	N	F3:8646	29.61	0	0	69	93
F.TASAGIQVVGDDLTVTNPKRIA.K	N	F1:9783	33.17	0	0	308	329
L.KVNQIGSVTESLQAC(+57.02)KLAQANGW.G	N	F3:11310	37.39	0	0.121378	343	365	C15:Carbamidomethylation:1000.00
Y.HNLKNVIKEKYGKDATNVGDEGGFAPN.I	N	F1:7396	26.21	0	0	190	216
A.SAGIQVVGDDLTVTNPKRIAKAVNEKSC(+57.02)NC(+57.02)L.L	N	F3:10005	33.58	0	0.0255448	310	340	C28:Carbamidomethylation:1000.00;C30:Carbamidomethylation:1000.00
F.TASAGIQVVGDDLTVTNPKRIAKA.V	N	F1:8878	30.53	0	0.0174689	308	331
W.GVMVSHRSGETEDTFIADLVVGL.C	N	F1:14511	47.02	0	0.0333488	366	388
Y.MGKGVSKAVEHINKTIAPALVSK.K	N	F1:7557	26.68	0	0	58	80
L.YRHIADLAGNSEVILPVPAFN.V	N	F1:12791	41.97	0	0	131	151
L.TVTNPKRIAKAVNEKSC(+57.02)NC(+57.02)L.L	N	F1:5908	21.89	0	1	321	340	C17:Carbamidomethylation:1000.00;C19:Carbamidomethylation:1000.00
M.VSHRSGETEDTFIADLVVGLC(+57.02)TGQIKTGAPC(+57.02)RSERL.A	N	F3:12471	40.79	0	0	369	404	C21:Carbamidomethylation:1000.00;C31:Carbamidomethylation:1000.00
V.PSGASTGIYEALELRDNDKTRY.M	N	F3:9721	32.75	0	0	36	57
R.AAVPSGASTGIYEALELRDNDKTRY.M	N	F3:10451	34.9	0	0	33	57
Y.RHIADLAGNSEVILPVPAF.N	N	F1:12631	41.5	0	0	132	150
L.KNVIKEKYGKDATNVGDEGGFAPN.I	N	F3:7247	25.53	0	0	193	216
L.KTAIGKAGYTDKVVIGM(+15.99)DVAASEF.F	N	F3:9490	32.08	0	0	228	251	M17:Oxidation (M):1000.00
N.KTIAPALVSKKLNVTEQEKIDKL.M	N	F1:8265	28.74	0	0	71	93
L.LKTAIGKAGYTDKVVIGMDVAASEFF.R	N	F3:13180	42.86	0	0	227	252
M.VSHRSGETEDTFIADLVVGL.C	N	F3:14356	46.31	0	0	369	388
L.AVC(+57.02)KAGAVEKGVPLY.R	N	F2:7529	26.49	0	0	117	131	C3:Carbamidomethylation:1000.00
Y.RHIADLAGNSEVILPVPAFN.V	N	F1:12153	40.1	0	0	132	151
V.GDDLTVTNPKRIAKAVNEKSC(+57.02)NC(+57.02)L.L	N	F2:9966	33.61	0	0.157682	317	340	C21:Carbamidomethylation:1000.00;C23:Carbamidomethylation:1000.00
L.AGNSEVILPVPAFNVINGGSHAGNKL.A	N	F3:12372	40.5	0	0	138	163
L.YRHIADLAGNSEVILPVPAFNVIN.G	N	F2:13517	44.02	0	0	131	154
F.IADLVVGLC(+57.02)TGQIKTGAPC(+57.02)RSERLAKY.N	N	F3:9471	32.02	0	0.0125691	381	407	C9:Carbamidomethylation:1000.00;C19:Carbamidomethylation:1000.00
W.QKFTASAGIQVVGDDLTVTNPKRIAKAVNEKSC(+57.02)NC(+57.02)L.L	N	F3:10270	34.36	0	0.0167041	305	340	C33:Carbamidomethylation:1000.00;C35:Carbamidomethylation:1000.00
H.NLKNVIKEKYGKDATNVGDEGGFAPNIL.E	N	F3:10104	33.87	0	0	191	218
C.TGQIKTGAPC(+57.02)RSERLAKY.N	N	F2:5054	19.26	0	0	390	407	C10:Carbamidomethylation:1000.00
L.LKTAIGKAGYTDKVVIGMDVAASEF.F	N	F3:11405	37.66	0	0	227	251
L.YRHIADLAGNSEVILPVPA.F	N	F1:11078	36.95	0	0	131	149
F.TASAGIQVVGDDLTVTNPKRIAKAVNEK.S	N	F2:9297	31.65	0	0	308	335
M.GKGVSKAVEHINKTIAPALVSKKL.N	N	F3:7519	26.32	0	0	59	82
F.TASAGIQVVGDDLTVTNPKRIAKAVNEKSC(+57.02)NC(+57.02)LL.L	N	F1:10661	35.74	0	0	308	341	C30:Carbamidomethylation:1000.00;C32:Carbamidomethylation:1000.00
Y.MGKGVSKAVEHINKTIAPA.L	N	F3:6652	23.8	0	0	58	76
F.NVINGGSHAGNKLAMQEF.M	N	F1:8700	30.01	0	0	151	168
Y.TDKVVIGMDVAASEF.F	N	F3:12205	40.01	0	0	237	251
L.GVSLAVC(+57.02)KAGAVEKGVPL.Y	N	F3:9475	32.03	0	0.0779266	113	130	C7:Carbamidomethylation:1000.00
Y.EALELRDNDKTRY.M	N	F3:6347	22.91	0	0	45	57
N.EKSC(+57.02)NC(+57.02)LLL.K	N	F3:9009	30.67	0.218807	0	334	342	C4:Carbamidomethylation:1000.00;C6:Carbamidomethylation:1000.00
F.TASAGIQVVGDDLTVTNPKRIAKAVNEKSC(+57.02)N.C	N	F3:9454	31.97	0	0.0141001	308	338	C30:Carbamidomethylation:1000.00
Y.KSFIKDYPVVSIEDPFDQDDW.G	N	F3:14151	45.71	0	0.217323	281	301
L.YRHIADLAGNSEVILPVPAFNVI.N	N	F2:14367	46.6	0	0	131	153
K.AVEHINKTIAPALVSKKL.N	N	F1:7306	25.95	0	0	65	82
F.TASAGIQVVGDDLTVTNPKRIAK.A	N	F3:8771	29.97	0	0	308	330
F.IADLVVGLC(+57.02)TGQIKTGAPC(+57.02)RSERL.A	N	F3:10007	33.58	0	0	381	404	C9:Carbamidomethylation:1000.00;C19:Carbamidomethylation:1000.00
L.KVNQIGSVTESLQAC(+57.02)KLAQANGWGVM.V	N	F2:12134	39.96	0	0.163543	343	368	C15:Carbamidomethylation:1000.00
F.TASAGIQVVGDDLTVTNPKRIAKAVNEKS.C	N	F3:9326	31.59	0	0.0153285	308	336
A.STGIYEALELRDNDKTRY.M	N	F2:9471	32.16	0	0	40	57
N.VINGGSHAGNKLAMQEF.M	N	F3:8142	28.13	0	0	152	168
Y.HNLKNVIKEKY.G	N	F1:4752	18.37	0	0	190	200
F.RAAVPSGASTGIYEALEL.R	N	F2:12606	41.34	0	0	32	49
Q.LLRIEEELGSKAKF.A	N	F3:11173	37	0	0.0100844	410	423
G.KGVSKAVEHINKTIAPALVSKKL.N	N	F3:7362	25.86	0	0	60	82
V.VGDDLTVTNPKRIAKAVNEKSC(+57.02)NC(+57.02)L.L	N	F1:10070	34.01	0	0.214092	316	340	C22:Carbamidomethylation:1000.00;C24:Carbamidomethylation:1000.00
F.TASAGIQVVGDDLTVTNPKR.I	N	F3:9195	31.21	0	0	308	327
F.RAAVPSGASTGIYEAL.E	N	F3:9930	33.35	0	0	32	47
Y.TDKVVIGMDVAASEFF.R	N	F3:14593	47.01	0	0	237	252
L.FRAAVPSGASTGIYEAL.E	N	F3:10966	36.4	0	0	31	47
Y.GKDATNVGDEGGFAPNILENKEGLEL.L	N	F1:12201	40.24	0	0	201	226
L.VSKKLNVTEQEKIDKL.M	N	F3:6335	22.88	0	0.0778936	78	93
Q.VVGDDLTVTNPKRIAKAVNEKSC(+57.02)NC(+57.02)LL.L	N	F3:9626	32.48	0.0270901	0.0943431	315	341	C23:Carbamidomethylation:1000.00;C25:Carbamidomethylation:1000.00
F.RAAVPSGASTGIYEALELR.D	N	F3:10741	35.74	0	0	32	50
Y.MGKGVSKAVEHINKTIAPAL.V	N	F2:8128	28.24	0	0	58	77
K.TAIGKAGYTDKVVIGMDVAASEF.F	N	F2:12120	39.92	0	0	229	251
Y.HNLKNVIKEKYGKDATN.V	N	F1:4676	18.13	0	0	190	206
L.LRIEEELGSKAKF.A	N	F3:11141	36.91	0	0	411	423
Y.GKDATNVGDEGGFAPNIL.E	N	F1:11072	36.94	0	0	201	218
Q.KFTASAGIQVVGDDLTVTNPKRIAKAVNEKSC(+57.02)NC(+57.02)L.L	N	F2:10210	34.33	0.0325003	0.0830668	306	340	C32:Carbamidomethylation:1000.00;C34:Carbamidomethylation:1000.00
M.DGTENKSKFGANAILGVSLAVC(+57.02)KAGAVEKGVPL.Y	N	F2:12655	41.48	0	0.0267598	98	130	C22:Carbamidomethylation:1000.00
L.RIEEELGSKAKF.A	N	F2:6793	24.35	0	0	412	423
I.YEALELRDNDKTRY.M	N	F3:9716	32.74	0	0	44	57
Y.TDKVVIGM(+15.99)DVAASEFF.R	N	F3:12636	41.27	0	0	237	252	M8:Oxidation (M):1000.00
Y.MGKGVSKAVEHINKTIAPALV.S	N	F2:8321	28.8	0	0	58	78
Y.RHIADLAGNSEVILPVPAFNVINGGSHAGNKLAM(+15.99)QEF.M	N	F2:12383	40.69	0	0	132	168	M34:Oxidation (M):1000.00
L.C(+57.02)TGQIKTGAPC(+57.02)RSERL.A	N	F3:5178	19.51	0	0	389	404	C1:Carbamidomethylation:1000.00;C11:Carbamidomethylation:1000.00
W.GVMVSHRSGETEDTFIADLVVGLC(+57.02)TGQIKTGAPC(+57.02).R	N	F1:14268	46.3	0	0	366	399	C24:Carbamidomethylation:1000.00;C34:Carbamidomethylation:1000.00
P.SGASTGIYEALELRDNDKTRY.M	N	F3:9739	32.8	0	0	37	57
Y.M(+15.99)GKGVSKAVEHINKTIAPALV.S	N	F3:8051	27.86	0.068192	0	58	78	M1:Oxidation (M):1000.00
Y.KSFIKDYPVVSIEDPF.D	N	F2:12391	40.71	0	0.221762	281	296
T.ASAGIQVVGDDLTVTNPKRIAKAVNEKSC(+57.02)NC(+57.02)L.L	N	F3:10030	33.65	0	0.031906	309	340	C29:Carbamidomethylation:1000.00;C31:Carbamidomethylation:1000.00
I.LPVGAANF.R	N	F3:17672	58.37	0.178295	0	171	178
L.AVC(+57.02)KAGAVEKGVPL.Y	N	F3:7060	24.98	0	0	117	130	C3:Carbamidomethylation:1000.00
N.PKRIAKAVNEKSC(+57.02)NC(+57.02)L.L	N	F2:3829	15.25	0	0	325	340	C13:Carbamidomethylation:1000.00;C15:Carbamidomethylation:1000.00
K.GVSKAVEHINKTIAPALVSKKL.N	N	F3:8207	28.32	0	0	61	82
F.TASAGIQVVGDDLTVTNPKRIAKAV.N	N	F2:9746	32.97	0	0.0533984	308	332
L.PVPAFNVINGGSHAGNKL.A	N	F2:11868	39.18	0	0.0168242	146	163
L.LLKVNQIGSVTES.L	N	F3:9010	30.67	0.143388	0.125939	341	353
S.KAVEHINKTIAPALVSKKL.N	N	F3:6543	23.48	0	0	64	82
S.GASTGIYEALELRDNDKTRY.M	N	F3:9705	32.71	0	0	38	57
Y.NQLLRIEEELGSKAK.F	N	F3:9634	32.5	0	0.0136656	408	422
I.NGGSHAGNKLAMQEF.M	N	F3:8163	28.19	0	0	154	168
Y.M(+15.99)GKGVSKAVEHINKTIAPALVSK.K	N	F2:7083	25.19	0	0	58	80	M1:Oxidation (M):1000.00
N.QLLRIEEELGSKAKF.A	N	F3:11157	36.95	0	0	409	423
Y.KSFIKDYPVVSIEDPFDQDDWGAW.Q	N	F2:15070	48.66	0	0.10269	281	304
L.NVTEQEKIDKLMIEM(+15.99)DGTENKSKF.G	N	F3:8879	30.29	0	0.0301733	83	106	M15:Oxidation (M):38.16
L.PVGAANF.R	N	F1:10778	36.08	0.0175689	0	172	178
Y.DLDFKSPDDPSRY.I	N	F1:8903	30.6	0	0	258	270
L.RIEEELGSKAKFA.G	N	F2:6778	24.31	0	0	412	424
L.KVNQIGSVTESLQAC(+57.02).K	N	F3:9231	31.31	0	0.0970551	343	357	C15:Carbamidomethylation:1000.00
E.ALELRDNDKTRY.M	N	F3:6383	23.01	0	0	46	57
F.TASAGIQVVGDDLTVTNPK.R	N	F2:9941	33.54	0	0.0299566	308	326
W.QKFTASAGIQVVGDDLTVTNPKRIAKAVNEKSC(+57.02)NC(+57.02)LL.L	N	F1:10864	36.33	0	0.141905	305	341	C33:Carbamidomethylation:1000.00;C35:Carbamidomethylation:1000.00
F.IKDYPVVSIEDPF.D	N	F2:12750	41.76	0	0.0885975	284	296
E.HINKTIAPALVSKKL.N	N	F1:5954	22.03	0	0.0176641	68	82
F.RAAVPSGASTGIY.E	N	F3:8848	30.2	0	0	32	44
W.QKFTASAGIQVVGDDLTVTNPKRIA.K	N	F3:10212	34.19	0	0.0388395	305	329
V.SKKLNVTEQEKIDKL.M	N	F1:5829	21.66	0	0.073996	79	93
F.APNILENKEGLELL.K	N	F3:12591	41.14	0	0	214	227
T.AIGKAGYTDKVVIGMDVAASEF.F	N	F3:12081	39.65	0	0	230	251
F.MILPVGAANF.R	N	F3:14003	45.27	0	0	169	178
K.RIAKAVNEKSC(+57.02)NC(+57.02)L.L	N	F1:4502	17.63	0	0	327	340	C11:Carbamidomethylation:1000.00;C13:Carbamidomethylation:1000.00
N.VINGGSHAGNKLAM(+15.99)QEF.M	N	F3:7000	24.81	0	0	152	168	M14:Oxidation (M):1000.00
A.LVSKKLNVTEQEKIDKL.M	N	F3:7005	24.82	0	0	77	93
Y.TDKVVIGM(+15.99)DVAASEF.F	N	F3:10371	34.66	0	0.0306551	237	251	M8:Oxidation (M):1000.00
T.GIYEALELRDNDKTRY.M	N	F3:9717	32.74	0	0	42	57
D.GTENKSKFGANAILGVSL.A	N	F3:10812	35.94	0	0.11066	99	116
Y.HNLKNVIKEKYGKD.A	N	F3:4493	17.48	0	0	190	203
V.PAFNVINGGSHAGNKLAMQEF.M	N	F2:13098	42.8	0	0	148	168
L.LLKVNQIGSVTESLQAC(+57.02).K	N	F3:11671	38.44	0	0.135718	341	357	C17:Carbamidomethylation:1000.00
K.RIAKAVNEKSC(+57.02)NC(+57.02)LLL.K	N	F1:7143	25.47	0	0	327	342	C11:Carbamidomethylation:1000.00;C13:Carbamidomethylation:1000.00
F.RSGKYDLDFKSPDDPSR.Y	N	F1:6715	24.23	0	0	253	269
L.LRIEEELGSKAKFA.G	N	F1:8555	29.59	0	0	411	424
Y.DLDFKSPDDPS.R	N	F3:8903	30.36	0.0581544	0	258	268
W.QKFTASAGIQVVGDDLTVTNPKRIAK.A	N	F3:9420	31.87	0.162236	0.0845004	305	330
F.KSPDDPSRYISPDQLADLY.K	N	F3:12012	39.44	0	0	262	280
L.FRAAVPSGASTGIY.E	N	F3:9166	31.12	0	0	31	44
R.IAKAVNEKSC(+57.02)NC(+57.02)L.L	N	F2:5065	19.29	0	0	328	340	C10:Carbamidomethylation:1000.00;C12:Carbamidomethylation:1000.00
S.TGIYEALELRDNDKTRY.M	N	F3:9724	32.76	0	0	41	57
V.TEQEKIDKLMIEMDGTENKSKF.G	N	F2:10409	34.92	0.422136	0.478532	85	106
F.DSRGNPTVEVDLF.T	N	F3:12303	40.3	0	0	13	25
W.GVM(+15.99)VSHRSGETEDTFIADLVVGL.C	N	F1:14264	46.29	0	0.0131538	366	388	M3:Oxidation (M):1000.00
L.ELRDNDKTRY.M	N	F3:6376	22.99	0	0	48	57
F.RAAVPSGASTGIYEALE.L	N	F2:10001	33.71	0	0.0177279	32	48
H.RSGETEDTFIADLVVGL.C	N	F3:15967	51.54	0	0	372	388
Y.GKDATNVGDEGGF.A	N	F2:7136	25.35	0	0	201	213
W.QKFTASAGIQVVGDDLTVTNPKRIAKAVNEKSC(+57.02)N.C	N	F3:9810	33.01	0	0.0411335	305	338	C33:Carbamidomethylation:1000.00
C.TGQIKTGAPC(+57.02)RSERL.A	N	F1:4720	18.27	0	0	390	404	C10:Carbamidomethylation:1000.00
Y.MGKGVSKAVEH.I	N	F3:2959	12.3	0	0	58	68
L.LLKVNQIGSVTESLQAC(+57.02)K.L	N	F3:9922	33.33	0	0.0902174	341	358	C17:Carbamidomethylation:1000.00
L.LKVNQIGSVTESLQAC(+57.02).K	N	F2:10016	33.76	0	0.110954	342	357	C16:Carbamidomethylation:1000.00
W.QKFTASAGIQVVGDDLTVTNPKRIAKAVNEKSC(+57.02)NC(+57.02).L	N	F1:9761	33.1	0.192936	0.174027	305	339	C33:Carbamidomethylation:1000.00;C35:Carbamidomethylation:1000.00
L.KVNQIGSVTESLQAC(+57.02)K.L	N	F1:7693	27.07	0	0.125382	343	358	C15:Carbamidomethylation:1000.00
S.KKLNVTEQEKIDKL.M	N	F3:5873	21.52	0	0	80	93
A.LELRDNDKTRY.M	N	F3:6374	22.99	0	0	47	57
Y.M(+15.99)GKGVSKAVEHINKTIAPA.L	N	F1:5761	21.46	0	0	58	76	M1:Oxidation (M):1000.00
Y.RHIADLAGNSEVILPVPA.F	N	F2:10508	35.2	0	0.0149403	132	149
V.TNPKRIAKAVNEKSC(+57.02)NC(+57.02)L.L	N	F3:5377	20.09	0	0	323	340	C15:Carbamidomethylation:1000.00;C17:Carbamidomethylation:1000.00
L.C(+57.02)TGQIKTGAPC(+57.02)RSERLA.K	N	F2:5047	19.24	0	0	389	405	C1:Carbamidomethylation:1000.00;C11:Carbamidomethylation:1000.00
F.APNILENKEGLEL.L	N	F1:11053	36.88	0	0.131166	214	226
F.DSRGNPTVEVDLFTSKGLF.R	N	F1:13621	44.41	0	0.0632793	13	31
L.KIHAREIFDSRGNPTVEVD.L	N	F2:7855	27.45	0.109555	0	5	23
L.NVTEQEKIDKL.M	N	F3:6590	23.61	0	0.0131105	83	93
A.KAVNEKSC(+57.02)NC(+57.02)LLL.K	N	F1:7437	26.33	0	0	330	342	C8:Carbamidomethylation:1000.00;C10:Carbamidomethylation:1000.00
Y.KSFIKDYPVVSIEDPFDQD.D	N	F2:12718	41.67	0	0.431662	281	299
L.AGNSEVILPVPAFN.V	N	F2:13689	44.52	0	0	138	151
Y.MGKGVSKAVEHINKTIAPALVSKKLNVTEQEKIDKLMIEMDGTENKSKF.G	N	F3:10520	35.1	0	0	58	106
Y.NQLLRIEEELGSKA.K	N	F1:10821	36.21	0	0.0186198	408	421
K.KLNVTEQEKIDKL.M	N	F2:6921	24.72	0	0	81	93
N.QIGSVTESLQAC(+57.02)KL.A	N	F2:9918	33.47	0	0.0459072	346	359	C12:Carbamidomethylation:1000.00
A.VC(+57.02)KAGAVEKGVPL.Y	N	F1:6080	22.38	0	0	118	130	C2:Carbamidomethylation:1000.00
L.VVGLC(+57.02)TGQIKTGAPC(+57.02).R	N	F3:8611	29.51	0	0	385	399	C5:Carbamidomethylation:1000.00;C15:Carbamidomethylation:1000.00
F.NVINGGSHAGNKL.A	N	F3:5062	19.18	0	0	151	163
A.KAVNEKSC(+57.02)NC(+57.02)LL.L	N	F3:5799	21.31	0	0	330	341	C8:Carbamidomethylation:1000.00;C10:Carbamidomethylation:1000.00
L.LKVNQIGSVTESLQAC(+57.02)KLA.Q	N	F3:10375	34.67	0	0.448	342	360	C16:Carbamidomethylation:1000.00
V.C(+57.02)KAGAVEKGVPL.Y	N	F3:6699	23.93	0	0	119	130	C1:Carbamidomethylation:1000.00
L.QAC(+57.02)KLAQANGW.G	N	F1:7845	27.51	0	0	355	365	C3:Carbamidomethylation:1000.00
L.DFKSPDDPSRY.I	N	F1:8920	30.65	0	0	260	270
Y.MGKGVSKAVEHIN.K	N	F1:4518	17.67	0	0	58	70
W.GVMVSHRSGETEDTF.I	N	F2:6648	23.93	0	0	366	380
W.GVM(+15.99)VSHRSGETEDTFIADLVVGLC(+57.02).T	N	F2:13920	45.19	0	0	366	389	M3:Oxidation (M):1000.00;C24:Carbamidomethylation:1000.00
K.LNVTEQEKIDKLMIEM(+15.99)DGTENKSKF.G	N	F3:9396	31.8	1	0.26281	82	106	M16:Oxidation (M):0.00
A.VC(+57.02)KAGAVEKGVPLY.R	N	F2:7313	25.86	0	0	118	131	C2:Carbamidomethylation:1000.00
F.TASAGIQVVGDDL.T	N	F3:11121	36.85	0	0	308	320
L.NVTEQEKIDKLMIEMDGTENKSKFGANAILGVSL.A	N	F1:13038	42.71	0	0.174783	83	116
F.MILPVGAANFREAM.R	N	F3:12308	40.31	0	0.0277239	169	182
M.VSHRSGETEDTFIADL.V	N	F3:10056	33.73	0	0	369	384
E.LRDNDKTRY.M	N	F3:6404	23.07	0	0.0314408	49	57
V.NQIGSVTESLQAC(+57.02)KL.A	N	F3:10570	35.25	0	0.0492859	345	359	C13:Carbamidomethylation:1000.00
L.RIEEELGSKAKFAG.R	N	F2:6715	24.12	0	0	412	425
F.TASAGIQVVGDDLTVTNPKRIAKAVNEKSC(+57.02)NC(+57.02)LLL.K	N	F3:11390	37.62	0	0.0222716	308	342	C30:Carbamidomethylation:1000.00;C32:Carbamidomethylation:1000.00
A.GIQVVGDDLTVTNPKRIAKAVNEKSC(+57.02)NC(+57.02)L.L	N	F1:9428	32.13	0.328884	0.0612477	312	340	C26:Carbamidomethylation:1000.00;C28:Carbamidomethylation:1000.00
V.SHRSGETEDTFIADLVVGL.C	N	F1:14345	46.52	0	0.010002	370	388
F.REAMRIGAEVY.H	N	F2:7618	26.75	0	0	179	189
F.DSRGNPTVEVDL.F	N	F2:9534	32.35	0	0	13	24
F.MILPVGAANFREAMRIGAEVY.H	N	F1:13853	45.09	0	0	169	189
F.MILPVGAANFR.E	N	F2:10941	36.47	0	0	169	179
L.YRHIADLAGNSEVILPVPAFNVINGG.S	N	F3:13899	44.97	0	0	131	156
D.PSRYISPDQLADLY.K	N	F2:11846	39.12	0	0	267	280
Y.MGKGVSKAVEHINK.T	N	F2:3770	15.08	0	0.0187214	58	71
Y.RHIADLAGNSEVILPVPAFNVIN.G	N	F1:13370	43.68	0	0	132	154
L.ELLKTAIGKAGY.T	N	F1:8358	29.01	0	0	225	236
D.SRGNPTVEVDLF.T	N	F3:10853	36.06	0	0	14	25
Y.EALELR.D	N	F2:6522	23.57	0.123525	0	45	50
L.LLKVNQIGSVTESL.Q	N	F1:11041	36.84	0	0.293973	341	354
L.C(+57.02)TGQIKTGAPC(+57.02)RSERLAK.Y	N	F1:4363	17.23	0	0	389	406	C1:Carbamidomethylation:1000.00;C11:Carbamidomethylation:1000.00
F.RAAVPSGASTGIYEA.L	N	F3:7795	27.12	0	0	32	46
V.EHINKTIAPALVSKKL.N	N	F3:6865	24.42	0	0	67	82
C.KAGAVEKGVPLY.R	N	F3:6714	23.98	0	0	120	131
L.KVNQIGSVTESLQ.A	N	F3:8362	28.78	0	0.085486	343	355
L.DFKSPDDPSRYIS.P	N	F2:8873	30.42	0.05	0	260	272
F.RAAVPSGASTGIYE.A	N	F3:7445	26.11	0	0	32	45
L.AGNSEVILPVPAFNVINGGSHAGNKLAMQEF.M	N	F2:13610	44.29	0	0	138	168
L.LLKVNQIGSVTESLQA.C	N	F3:10810	35.94	0	0.326176	341	356
L.LLKVNQIGSVTESLQ.A	N	F2:10539	35.29	0	0.109471	341	355
L.QAC(+57.02)KLAQANGWG.V	N	F2:8182	28.4	0.183587	0	355	366	C3:Carbamidomethylation:1000.00
Y.GKDATNVGDEGGFAPN.I	N	F3:7255	25.55	0	0	201	216
L.C(+57.02)TGQIKTGAPC(+57.02)RS.E	N	F3:3978	15.86	0	0	389	401	C1:Carbamidomethylation:1000.00;C11:Carbamidomethylation:1000.00
M.DGTENKSKFGANAILGVSL.A	N	F3:11783	38.77	0	0.354154	98	116
L.C(+57.02)TGQIKTGAPC(+57.02)RSER.L	N	F1:3565	14.33	0	0	389	403	C1:Carbamidomethylation:1000.00;C11:Carbamidomethylation:1000.00
K.AVNEKSC(+57.02)NC(+57.02)LLL.K	N	F3:9199	31.22	0	0	331	342	C7:Carbamidomethylation:1000.00;C9:Carbamidomethylation:1000.00
F.IKDYPVVSIEDPFDQDDW.G	N	F2:14921	48.23	0	0.415172	284	301
F.M(+15.99)ILPVGAANF.R	N	F2:12656	41.49	0	0	169	178	M1:Oxidation (M):1000.00
A.VEHINKTIAPALVSKKL.N	N	F1:7176	25.57	0	0	66	82
P.KRIAKAVNEKSC(+57.02)NC(+57.02)L.L	N	F1:3594	14.42	0	0	326	340	C12:Carbamidomethylation:1000.00;C14:Carbamidomethylation:1000.00
L.MIEM(+15.99)DGTENKSKF.G	N	F3:5929	21.69	0	0	94	106	M4:Oxidation (M):29.32
Q.AC(+57.02)KLAQANGW.G	N	F3:7949	27.57	0	0	356	365	C2:Carbamidomethylation:1000.00
L.KTAIGKAGYTDKVVIGMD.V	N	F3:7872	27.35	0	0	228	245
T.VTNPKRIAKAVNEKSC(+57.02)NC(+57.02)L.L	N	F1:5796	21.56	0	0.565041	322	340	C16:Carbamidomethylation:1000.00;C18:Carbamidomethylation:1000.00
Y.KSFIKDYPVVSIED.P	N	F2:9827	33.2	0	0.52124	281	294
V.C(+57.02)KAGAVEKGVPLY.R	N	F2:7574	26.62	0	0	119	131	C1:Carbamidomethylation:1000.00
A.KAVNEKSC(+57.02)NC(+57.02)L.L	N	F1:3693	14.71	0	0	330	340	C8:Carbamidomethylation:1000.00;C10:Carbamidomethylation:1000.00
V.GDDLTVTNPKRIAKAVNEKSC(+57.02)NC(+57.02)LL.L	N	F2:10850	36.2	0	0.186162	317	341	C21:Carbamidomethylation:1000.00;C23:Carbamidomethylation:1000.00
F.IADLVVGLC(+57.02)TGQIKTGAPC(+57.02).R	N	F1:11343	37.73	0	0	381	399	C9:Carbamidomethylation:1000.00;C19:Carbamidomethylation:1000.00
F.IKDYPVVSIEDPFDQDD.W	N	F3:13142	42.75	0	0.239016	284	300
L.VSKKLNVTEQEKIDKLMIEMDGTENKSKF.G	N	F1:7244	25.77	1	0.115323	78	106
L.KVNQIGSVTESL.Q	N	F3:8815	30.1	0	0.266343	343	354
L.C(+57.02)TGQIKTGAPC(+57.02).R	N	F3:4989	18.97	0	0	389	399	C1:Carbamidomethylation:1000.00;C11:Carbamidomethylation:1000.00
F.RSGKYDLDFKSPDD.P	N	F1:7172	25.56	0	0	253	266
D.ATNVGDEGGFAPNIL.E	N	F2:12678	41.55	0	0.0637795	204	218
C.LLLKVNQIGSVTESL.Q	N	F3:12320	40.35	0	0.161349	340	354
Y.DLDFKSPDDPSR.Y	N	F1:7650	26.95	0	0	258	269
T.AIGKAGYTDKVVIGMDVAASEFFRSGKY.D	N	F3:13105	42.64	0	0	230	257
G.LC(+57.02)TGQIKTGAPC(+57.02)RSERL.A	N	F3:6450	23.21	0.0327871	0	388	404	C2:Carbamidomethylation:1000.00;C12:Carbamidomethylation:1000.00
E.SLQAC(+57.02)KLAQANGW.G	N	F2:9809	33.15	0	1	353	365	C5:Carbamidomethylation:1000.00
K.AVEHINKTIAPAL.V	N	F2:7867	27.48	0.825581	0	65	77
T.IAPALVSKKLNVTEQEKIDKL.M	N	F3:8650	29.62	0.244012	0.220829	73	93
F.RAAVPSGASTGI.Y	N	F3:6517	23.4	0	0	32	43
S.RYISPDQLADLY.K	N	F3:11766	38.72	0	0	269	280
D.FKSPDDPSRY.I	N	F3:6186	22.44	0	0	261	270
L.LKVNQIGSVTESL.Q	N	F1:10155	34.25	0	0.287682	342	354
L.LKVNQIGSVTESLQ.A	N	F3:9790	32.95	0	0.106104	342	355
C.KLAQANGW.G	N	F2:6825	24.44	0	0	358	365
K.AVNEKSC(+57.02)NC(+57.02)LL.L	N	F1:7302	25.94	0	0	331	341	C7:Carbamidomethylation:1000.00;C9:Carbamidomethylation:1000.00
L.DFKSPDDPSRYISP.D	N	F3:8355	28.76	0.6288	0	260	273
M.VSHRSGETEDTF.I	N	F2:5492	20.53	0	0	369	380
D.LDFKSPDDPSRY.I	N	F2:9041	30.9	0	0	259	270
L.RDNDKTRY.M	N	F2:1267	5.55	0	0	50	57
Y.KSFIKDYPVVS.I	N	F1:7912	27.71	0	0	281	291
S.LAVC(+57.02)KAGAVEKGVPL.Y	N	F1:7852	27.53	0	0	116	130	C4:Carbamidomethylation:1000.00
L.C(+57.02)TGQIKTGAPC(+57.02)RSERLAKYN.Q	N	F3:5322	19.92	0	0	389	408	C1:Carbamidomethylation:1000.00;C11:Carbamidomethylation:1000.00
A.KYNQLLRIEEEL.G	N	F3:10918	36.26	0	0.0331106	406	417
L.C(+57.02)TGQIKTGAPC(+57.02)RSE.R	N	F3:4201	16.52	0	0	389	402	C1:Carbamidomethylation:1000.00;C11:Carbamidomethylation:1000.00
D.GTENKSKFGANAILGVSLAVC(+57.02)KAGAVEKGVPL.Y	N	F3:12061	39.59	0.0187564	0.199042	99	130	C21:Carbamidomethylation:1000.00
N.VINGGSHAGNKL.A	N	F2:3807	15.19	0	0	152	163
E.IFDSRGNPTVEVDLF.T	N	F3:13193	42.9	0.0546919	0.0289799	11	25
I.NGGSHAGNKL.A	N	F2:3823	15.24	0	0	154	163
T.GQIKTGAPC(+57.02)RSERLAKY.N	N	F2:5027	19.18	0	0	391	407	C9:Carbamidomethylation:1000.00
H.INKTIAPALVSKKL.N	N	F3:7468	26.17	0	0	69	82
Y.MGKGVSKAVEHINKTIAPALVS.K	N	F1:8409	29.16	0.421184	0.05548	58	79
L.C(+57.02)TGQIKTGAPC(+57.02)R.S	N	F2:3830	15.26	0	0	389	400	C1:Carbamidomethylation:1000.00;C11:Carbamidomethylation:1000.00
H.NLKNVIKEKY.G	N	F3:5831	21.4	0	0	191	200
E.FM(+15.99)ILPVGAANF.R	N	F3:14851	47.79	0	0	168	178	M2:Oxidation (M):1000.00
G.ASTGIYEALELRDNDKTRY.M	N	F3:9771	32.89	0	0.0138317	39	57
I.KTGAPC(+57.02)RSERLAKY.N	N	F3:5463	20.33	0	0	394	407	C6:Carbamidomethylation:1000.00
L.KTAIGKAGYTDK.V	N	F2:3429	13.93	0	0	228	239
L.K(+42.01)IHAREIF.D	N	F1:7287	25.89	0	0	5	12	K1:Acetylation (Protein N-term):1000.00
A.VNEKSC(+57.02)NC(+57.02)LLL.K	N	F1:9000	30.88	0.0826092	0	332	342	C6:Carbamidomethylation:1000.00;C8:Carbamidomethylation:1000.00
L.RIEEELGSKAK.F	N	F3:4091	16.2	0	0	412	422
F.GANAILGVSLAVC(+57.02)KAGAVE.K	N	F1:11917	39.41	0	0	107	125	C13:Carbamidomethylation:1000.00
V.TEQEKIDKL.M	N	F2:6540	23.62	0	0	85	93
L.KTAIGKAGY.T	N	F2:3840	15.28	0	0	228	236
L.TVTNPKRIAKAVNEKSC(+57.02)N.C	N	F1:4567	17.82	0	1	321	338	C17:Carbamidomethylation:1000.00
L.KIHAREIFDSRGNPT.V	N	F3:5653	20.88	0	0	5	19
K.TGAPC(+57.02)RSERLAKY.N	N	F3:4743	18.24	0	0	395	407	C5:Carbamidomethylation:1000.00
Y.HNLKNVIKEKYG.K	N	F3:5483	20.39	0	0	190	201
A.FNVINGGSHAGNKL.A	N	F1:7181	25.59	0	0	150	163
Y.NQLLRIEEEL.G	N	F2:11608	38.42	0	0	408	417
M.ILPVGAANF.R	N	F3:11608	38.25	0	0	170	178
F.GANAILGVSLAVC(+57.02)KAGAVEKGVPL.Y	N	F2:12745	41.75	0	0.189891	107	130	C13:Carbamidomethylation:1000.00
V.NEKSC(+57.02)NC(+57.02)LLL.K	N	F3:8913	30.39	0	0	333	342	C5:Carbamidomethylation:1000.00;C7:Carbamidomethylation:1000.00
Q.IKTGAPC(+57.02)RSERLAKY.N	N	F1:4657	18.08	0	0	393	407	C7:Carbamidomethylation:1000.00
Y.EALELRDNDKTR.Y	N	F1:4737	18.32	0	0	45	56
F.M(+15.99)ILPVGAANFREAMRIGAEVY.H	N	F2:13314	43.42	0	0	169	189	M1:Oxidation (M):82.05
E.FMILPVGAANF.R	N	F1:15668	50.54	0	0	168	178
I.NKTIAPALVSKKL.N	N	F1:7159	25.52	0	0	70	82
M.ILPVGAANFREAMRIGAEVY.H	N	F3:13050	42.48	0	0	170	189
A.VNEKSC(+57.02)NC(+57.02)LL.L	N	F3:7169	25.3	0	0	332	341	C6:Carbamidomethylation:1000.00;C8:Carbamidomethylation:1000.00
M.SILKIHAREIF.D	N	F2:8430	29.12	0	0.38019	2	12
Y.NQLLRIEEELG.S	N	F3:12359	40.46	0	0.0238468	408	418
L.ENKEGLELLKT.A	N	F1:7989	27.94	0.118713	0.116279	219	229
L.RIEEELGSK.A	N	F3:4740	18.23	0	0	412	420
L.KIHAREIF.D	N	F2:5451	20.41	0	0	5	12
L.LKVNQIGSVTESLQAC(+57.02)K.L	N	F3:9115	30.98	0	0.141726	342	358	C16:Carbamidomethylation:1000.00
R.IEEELGSKAKF.A	N	F2:7163	25.43	0	0	413	423
F.RSGKYDLDFKSPD.D	N	F3:7110	25.13	0	0	253	265
L.LKTAIGKAGY.T	N	F2:5359	20.15	0	0	227	236
K.LNVTEQEKIDKLM(+15.99)IEMDGTENKSKF.G	N	F1:9725	33	0.65126	0.388573	82	106	M13:Oxidation (M):12.33
H.AGNKLAMQEF.M	N	F1:8730	30.1	0	0	159	168
A.VNEKSC(+57.02)NC(+57.02)L.L	N	F3:4782	18.36	0	0	332	340	C6:Carbamidomethylation:1000.00;C8:Carbamidomethylation:1000.00
C.KAGAVEKGVPL.Y	N	F3:5920	21.66	0	0	120	130
F.AGRNFRNPL.A	N	F1:6026	22.23	0	0	424	432
N.VTEQEKIDKL.M	N	F1:6288	22.99	0	0.590992	84	93
L.LKVNQIGSVTESLQA.C	N	F2:10011	33.74	0	0.360424	342	356
L.TVTNPKRIAKAVNEKSC(+57.02)NC(+57.02)LLL.K	N	F3:8100	28.01	0	1	321	342	C17:Carbamidomethylation:1000.00;C19:Carbamidomethylation:1000.00
L.KIHAREIFDSR.G	N	F3:5002	19	0	0	5	15
V.INGGSHAGNKLAMQEF.M	N	F1:7952	27.83	0	0	153	168
Y.ISPDQLADLY.K	N	F2:13120	42.86	0	0.144758	271	280
F.MILPVGA.A	N	F1:11003	36.73	0.0265905	0.0168479	169	175
L.AGNSEVILPVPAF.N	N	F2:14658	47.46	0	0.0324931	138	150
I.SPDQLADLY.K	N	F3:11642	38.35	0	0	272	280
L.KIHAREIFD.S	N	F3:5372	20.07	0	0	5	13
G.IYEALELRDNDKTRY.M	N	F1:8194	28.54	0	0.0175829	43	57
L.YRHIADLAGNSEVILPVPAFNVINGGS.H	N	F1:13805	44.95	0.0445	0	131	157
M.SILKIHAREIFDSR.G	N	F1:7805	27.39	0	0.728866	2	15
S.VTESLQAC(+57.02)KL.A	N	F3:7874	27.35	0	0.79167	350	359	C8:Carbamidomethylation:1000.00
Y.ISPDQLADLYK.S	N	F1:11077	36.95	0	0.206343	271	281
N.SEVILPVPAFNVINGGSHAGNKLAMQEF.M	N	F1:13906	45.24	0	0.0207461	141	168
L.YRHIADLAGN.S	N	F1:5953	22.02	0	0	131	140
L.QAC(+57.02)KLAQANGWGVM.V	N	F2:10014	33.75	0	0	355	368	C3:Carbamidomethylation:1000.00
N.KSKFGANAILGVSL.A	N	F2:10566	35.37	0	0.180832	103	116
K.VNQIGSVTESLQAC(+57.02)KL.A	N	F2:10954	36.51	0	0.292187	344	359	C14:Carbamidomethylation:1000.00
N.KSKFGANAILGVSLAVC(+57.02)KAGAVEKGVPL.Y	N	F2:11473	38.03	0	0.0920346	103	130	C17:Carbamidomethylation:1000.00
L.KVNQIGSVTESLQA.C	N	F1:8790	30.27	0.232649	0.293956	343	356
N.SEVILPVPAFNVINGGSHAGNKL.A	N	F2:12492	41.01	0	0.0388912	141	163
L.NVTEQEKIDK.L	N	F2:3843	15.29	0	0	83	92
L.LKVNQIGSVTESLQAC(+57.02)KLAQAN.G	N	F2:10080	33.94	0	0.328021	342	363	C16:Carbamidomethylation:1000.00
Y.M(+15.99)GKGVSKAVEHIN.K	N	F1:3587	14.4	0	0	58	70	M1:Oxidation (M):1000.00
W.GVM(+15.99)VSHRSGETEDTF.I	N	F3:6097	22.18	0	0	366	380	M3:Oxidation (M):1000.00
W.GVMVSHRSGETEDTFIADLVVGLC(+57.02).T	N	F2:14326	46.48	0	0	366	389	C24:Carbamidomethylation:1000.00
L.YRHIADLAGNSEV.I	N	F2:7702	27	0	0	131	143
E.EELGSKAKF.A	N	F3:6965	24.71	0	0	415	423
V.SHRSGETEDTF.I	N	F1:4319	17.07	0	0	370	380
N.KTIAPALVSKKL.N	N	F1:5963	22.05	0	0	71	82
T.ESLQAC(+57.02)KL.A	N	F3:6994	24.79	0	0.164911	352	359	C6:Carbamidomethylation:1000.00
Q.EKIDKLMIEMDGTENKSKF.G	N	F2:9140	31.19	0.943366	0.242832	88	106
L.MIEMDGTENKSKFGANAILGVSLAVC(+57.02)KAGAVEKGVPL.Y	N	F1:12990	42.56	0.0164453	0.0906547	94	130	C26:Carbamidomethylation:1000.00
K.LNVTEQEKIDKL.M	N	F2:8085	28.11	0	0.132784	82	93
A.IGKAGYTDKVVIGMDVAASEFF.R	N	F1:13934	45.32	0	0.0497208	231	252
M.RIGAEVY.H	N	F1:6543	23.73	0	0	183	189
N.VGDEGGFAPNIL.E	N	F1:12778	41.93	0	0	207	218
L.YRHIADLAGNSEVILPVPAFNVING.G	N	F1:13775	44.86	0	0	131	155
F.GANAILGVSLAVC(+57.02).K	N	F3:13771	44.59	0	0.0323814	107	119	C13:Carbamidomethylation:1000.00
F.REAM(+15.99)RIGAEVY.H	N	F1:5934	21.97	0	0.00777499	179	189	M4:Oxidation (M):1000.00
M.IEMDGTENKSKFGANAILGVSL.A	N	F2:12058	39.74	0.0634265	0.328344	95	116
K.TIAPALVSKKL.N	N	F1:7513	26.55	0	0	72	82
T.AIGKAGYTDKVVIGMDVAASEFF.R	N	F3:14082	45.5	0	0	230	252
Y.HNLKNVIKEKYGKDA.T	N	F2:4907	18.83	0	0.0763151	190	204
F.RAAVPSGASTGIYEALELRDND.K	N	F2:10811	36.09	0.0261773	0.0890868	32	53
N.ILENKEGLELL.K	N	F3:11491	37.91	0	0.0140792	217	227
R.EIFDSRGNPTVEVDLF.T	N	F2:13659	44.43	0.0139796	0.0244524	10	25
T.GQIKTGAPC(+57.02)RSERL.A	N	F2:4851	18.67	0	0	391	404	C9:Carbamidomethylation:1000.00
M.SILKIHAREIFD.S	N	F3:8690	29.74	0	1	2	13
S.AGIQVVGDDLTVTNPKRIAKAVNEKSC(+57.02)NC(+57.02)L.L	N	F3:9972	33.48	0	0.114277	311	340	C27:Carbamidomethylation:1000.00;C29:Carbamidomethylation:1000.00
F.GANAILGVSLAVC(+57.02)KAGAVEKGVPLY.R	N	F3:13107	42.65	0	0.0590012	107	131	C13:Carbamidomethylation:1000.00
Y.M(+15.99)GKGVSKAVEHINKTIAPALVS.K	N	F3:7880	27.37	0.0454147	0.0224638	58	79	M1:Oxidation (M):1000.00
M.IEMDGTENKSKF.G	N	F3:6593	23.62	0	0	95	106
F.TASAGIQVVGD.D	N	F3:8412	28.93	0	0	308	318
L.NVTEQEKID.K	N	F2:5148	19.53	0	0.0109481	83	91
F.IKDYPVVSIEDPFDQDDWGAW.Q	N	F3:16072	51.96	0	0.236739	284	304
H.INKTIAPAL.V	N	F3:7871	27.34	0	0	69	77
Y.M(+15.99)GKGVSKAVEHINKTIAPALVSKKLNVTEQEKIDKL.M	N	F2:8392	29.01	0.178575	0	58	93	M1:Oxidation (M):1000.00
S.HRSGETEDTFIADLVVGL.C	N	F1:14551	47.13	0	0	371	388
F.RSGKYDLDF.K	N	F3:8127	28.09	0	0	253	261
F.RAAVPSGAST.G	N	F1:3762	14.91	0	0	32	41
N.GGSHAGNKLAMQEF.M	N	F2:7301	25.83	0	0	155	168
T.GAPC(+57.02)RSERLAKY.N	N	F3:5431	20.24	0	0	396	407	C4:Carbamidomethylation:1000.00
L.LKVNQIGSVTES.L	N	F3:7993	27.69	0	0	342	353
L.YRHIADL.A	N	F3:6222	22.55	0	0	131	137
L.LRIEEELGSK.A	N	F2:7273	25.75	0	0	411	420
A.PC(+57.02)RSERLAKY.N	N	F1:4472	17.54	0	0	398	407	C2:Carbamidomethylation:1000.00
F.DSRGNPTVEVD.L	N	F1:5935	21.97	0	0	13	23
I.APALVSKKL.N	N	F3:7254	25.55	0	0	74	82
K.SKFGANAILGVSL.A	N	F2:12305	40.46	0	0.313896	104	116
F.GANAILGVSL.A	N	F2:14009	45.45	0	0.238838	107	116
L.LLKVNQIGSVT.E	N	F2:8608	29.64	0	0.029833	341	351
F.RSGKYDLDFK.S	N	F2:6138	22.44	0	0	253	262
L.GSKAKFAGRNFRNPLAK	N	F2:5372	20.19	0	0	418	434
F.IKDYPVVS.I	N	F2:6856	24.53	0	0	284	291
K.AKFAGRNF.R	N	F2:6023	22.11	0	0	421	428
L.KVNQIGSVTE.S	N	F1:5760	21.45	0	0.0260008	343	352
L.RIEEELGSKA.K	N	F2:5223	19.75	0	0	412	421
L.NVTEQEKIDKLM(+15.99)IEMDGTENKSKF.G	N	F2:9173	31.28	0.127146	0	83	106	M12:Oxidation (M):22.45
T.NPKRIAKAVNEKSC(+57.02)NC(+57.02)L.L	N	F2:4788	18.49	0.785525	0.0636995	324	340	C14:Carbamidomethylation:1000.00;C16:Carbamidomethylation:1000.00
R.NFRNPL.A	N	F1:7850	27.53	0	0	427	432
L.KVNQIGSVTES.L	N	F2:5459	20.44	0	0	343	353
F.AGRNFRNPLAK	N	F1:5446	20.54	0	0	424	434
L.AVC(+57.02)KAGAVE.K	N	F2:3686	14.84	0	0	117	125	C3:Carbamidomethylation:1000.00
L.KTAIGKAGYTD.K	N	F3:4166	16.41	0	0	228	238
S.PDQLADLY.K	N	F3:13403	43.51	0	0.0397919	273	280
Y.KSFIKDYP.V	N	F1:6386	23.28	0	0	281	288
K.TAIGKAGY.T	N	F1:5036	19.19	0	0	229	236
F.TASAGIQVVGDDLT.V	N	F1:10802	36.15	0	0.150364	308	321
Y.RHIADL.A	N	F2:4554	17.79	0	0	132	137
D.TFIADLVVGL.C	N	F2:16468	53.98	0	0	379	388
N.FREAMRIGAEVY.H	N	F3:8838	30.17	0	0	178	189
L.LKVNQIGSVTE.S	N	F3:8112	28.04	0.0148187	0.0410256	342	352
S.RYISPDQL.A	N	F1:7963	27.86	0	0	269	276
Y.ISPDQLADL.Y	N	F3:12151	39.85	0	0.28648	271	279
R.EAMRIGAEVY.H	N	F2:8922	30.56	0.113264	0	180	189
N.KLAMQEF.M	N	F1:8598	29.71	0	0	162	168
L.MIEMDGTENKSKFGANAILGVSL.A	N	F3:12581	41.11	0	0.241703	94	116
Y.HNLKNVIKEK.Y	N	F3:4958	18.88	0	0.0287538	190	199
S.KAVEHINKTIAPAL.V	N	F3:6610	23.67	0	0	64	77
T.EQEKIDKL.M	N	F2:6588	23.76	0	0	86	93
A.STGIYEALEL.R	N	F2:13684	44.51	0	0.050694	40	49
L.KVNQIGSVT.E	N	F2:5205	19.7	0	0	343	351
F.GANAILGVSLA.V	N	F2:12746	41.75	0	0.711545	107	117
L.ENKEGLELL.K	N	F3:10100	33.86	0	0	219	227
V.SKAVEHINKTIAPALVSKKL.N	N	F2:6816	24.42	0	0	63	82
A.PALVSKKL.N	N	F1:7164	25.54	0	0	75	82
L.LKVNQIGSVT.E	N	F3:7772	27.05	0.0775472	0	342	351
L.KNVIKEKY.G	N	F3:3387	13.98	0	0.110049	193	200
K.IHAREIF.D	N	F1:4944	18.92	0	0	6	12
F.REAMRIGAEV.Y	N	F3:6444	23.19	0	0	179	188
F.IADLVVGL.C	N	F2:13513	44.01	0.14667	0.0870956	381	388
R.YISPDQLADLY.K	N	F1:13915	45.27	0	0.0377383	270	280
N.KSKFGANAIL.G	N	F1:7162	25.53	0	0	103	112
G.KYDLDFKSPDDPSRY.I	N	F2:8520	29.38	0	0.0614727	256	270
M.DVAASEFF.R	N	F3:13373	43.43	0	0	245	252
Y.NQLLRIE.E	N	F1:8346	28.98	0	0	408	414
N.QLLRIEEEL.G	N	F2:10929	36.43	0	0	409	417
F.IADLVVGLC(+57.02).T	N	F1:12848	42.14	0	0	381	389	C9:Carbamidomethylation:1000.00
F.IKDYPVVSIEDPFDQD.D	N	F3:13043	42.46	0	0.198522	284	299
L.AKYNQLL.R	N	F1:7783	27.33	0	0	405	411
H.AGNKLAM(+15.99)QEF.M	N	F2:6967	24.85	0	0	159	168	M7:Oxidation (M):1000.00
A.MRIGAEVY.H	N	F1:8378	29.07	0	0	182	189
L.AQANGWGVMV.S	N	F1:10247	34.52	0	0	360	369
R.AAVPSGASTGIY.E	N	F3:8910	30.38	0	0	33	44
Y.DLDFKSPDD.P	N	F2:8418	29.08	0	0	258	266
F.KSPDDPSRY.I	N	F2:3953	15.66	0	0	262	270
W.GAWQKF.T	N	F3:7901	27.43	0	0	302	307
I.LENKEGLELL.K	N	F3:10407	34.77	0	0	218	227
D.DLTVTNPKRIAKAVNEKSC(+57.02)NC(+57.02)L.L	N	F1:8231	28.65	0	0.265504	319	340	C19:Carbamidomethylation:1000.00;C21:Carbamidomethylation:1000.00
D.VAASEFF.R	N	F2:11708	38.71	0	0	246	252
N.QIGSVTESL.Q	N	F3:9749	32.83	0	0.405789	346	354
D.GTENKSKF.G	N	F1:2449	10.57	0	0	99	106
F.MILPVGAAN.F	N	F2:10274	34.52	0	0.0125281	169	177
L.TVTNPKRIAKA.V	N	F1:3324	13.54	0	0.633328	321	331
L.LLKVNQIGS.V	N	F3:7604	26.56	0	0	341	349
V.GDDLTVTNPKRIAKAVNEKSC(+57.02)NC(+57.02)LLL.K	N	F3:11454	37.8	0	0.0958471	317	342	C21:Carbamidomethylation:1000.00;C23:Carbamidomethylation:1000.00
R.NFRNPLAK	N	F1:6314	23.07	0	0	427	434
F.IADLVVGLC(+57.02)TGQ.I	N	F3:12327	40.37	0	0.0748745	381	392	C9:Carbamidomethylation:1000.00
L.FTSKGLF.R	N	F1:9064	31.07	0	0	25	31
L.NVTEQEKIDKLMIEMDGTEN.K	N	F3:11137	36.89	0	0	83	102
F.FRSGKY.D	N	F3:3135	12.96	0	0	252	257
F.TASAGIQVVGDDLTV.T	N	F1:12280	40.47	0	0.322848	308	322
T.ASAGIQVVGDDLTVTNPKRIAKAVNEKSC(+57.02)NC(+57.02)LLL.K	N	F3:11284	37.31	0	0.565195	309	342	C29:Carbamidomethylation:1000.00;C31:Carbamidomethylation:1000.00
D.KVVIGMDVAASEF.F	N	F2:11429	37.9	0	0.127626	239	251
D.LFTSKGLF.R	N	F3:10902	36.21	0	0	24	31
F.MILPVGAANFREAMRIGAEVYHNLKNVIKEKY.G	N	F2:15062	48.64	0	0	169	200
L.YRHIADLA.G	N	F3:6342	22.9	0	0	131	138
T.ASAGIQVVGDDLTVTNPKRIAKAVNEKSC(+57.02)NC(+57.02)LL.L	N	F3:10608	35.36	0	0.0697536	309	341	C29:Carbamidomethylation:1000.00;C31:Carbamidomethylation:1000.00
A.GRNFRNPLAK	N	F2:5238	19.79	0	0	425	434
L.TVTNPKRIAKAVNEKSC(+57.02)NC(+57.02).L	N	F1:4716	18.26	0	1	321	339	C17:Carbamidomethylation:1000.00;C19:Carbamidomethylation:1000.00
L.AQANGWGVM.V	N	F1:10705	35.87	0	0	360	368
Y.KSFIKDYPVVSIEDPFDQDDWGA.W	N	F2:13787	44.8	0.0811674	0.322657	281	303
G.QIKTGAPC(+57.02)RSERLAKY.N	N	F3:5250	19.72	0	0	392	407	C8:Carbamidomethylation:1000.00
A.GAVEKGVPL.Y	N	F2:6905	24.67	0	0	122	130
E.LLKTAIGKAGY.T	N	F1:6699	24.19	0	0	226	236
L.LRIEEEL.G	N	F2:9017	30.83	0	0	411	417
S.PDDPSRY.I	N	F2:9022	30.85	0	0	264	270
S.ILKIHAREIF.D	N	F1:8263	28.74	0	0	3	12
L.RIEEEL.G	N	F2:6568	23.7	0	0	412	417
E.SLQAC(+57.02)KL.A	N	F3:6227	22.56	0	1	353	359	C5:Carbamidomethylation:1000.00
K.FAGRNF.R	N	F3:6381	23.01	0	0	423	428
N.ILENKEGLEL.L	N	F3:9534	32.21	0	0	217	226
L.KNVIKEKYGKDATNVGDEGGF.A	N	F3:6863	24.41	0.104852	0	193	213
S.ERLAKY.N	N	F1:3668	14.63	0	0.0833309	402	407
L.KNVIKEKYGKDATNVGDEGGFAPNIL.E	N	F3:8958	30.52	0.0155443	0	193	218
Q.LLRIEEEL.G	N	F3:10443	34.87	0	0	410	417
L.RIEEELGS.K	N	F2:5968	21.96	0	0	412	419
P.VVSIEDPFDQDDWGAW.Q	N	F1:16953	55.59	0	0.297076	289	304
I.HAREIF.D	N	F1:4906	18.81	0	0	7	12
Y.ISPDQLAD.L	N	F1:8477	29.36	0	0	271	278
H.AREIFDSRGNPTVEVDL.F	N	F2:10311	34.63	0	0.124823	8	24
E.LGSKAKF.A	N	F1:6858	24.65	0	0.398315	417	423
Y.HNLKNVIKEKYGKDATNVGD.E	N	F2:5575	20.77	0	0	190	209
L.NVTEQEKIDKLM.I	N	F3:8244	28.43	0	0	83	94
G.RNFRNPL.A	N	F2:6162	22.52	0	0	426	432
F.RAAVPSGA.S	N	F1:3695	14.71	0	0	32	39
F.RAAVPSGASTGIYEALELRDNDKTR.Y	N	F2:9210	31.39	0.0197617	0	32	56
Y.GKDATNVGD.E	N	F3:2925	12.2	0	0	201	209
Y.RHIADLAGNSEVILPVPAFNVI.N	N	F2:13832	44.93	0.031485	0.0256871	132	153
N.LKNVIKEKY.G	N	F1:4724	18.28	0	0	192	200
S.IEDPF.D	N	F2:10595	35.46	0	0.0178447	292	296
R.IAKAVNEKSC(+57.02)NC(+57.02)LLL.K	N	F1:8009	28	0	0	328	342	C10:Carbamidomethylation:1000.00;C12:Carbamidomethylation:1000.00
A.AVPSGASTGIY.E	N	F1:8528	29.51	0	0	34	44
F.RAAVPSGASTGIYEALELRDNDKT.R	N	F1:9646	32.77	0	0	32	55
MSILKIHAREIF.D	N	F3:9740	32.81	0	0.339904	1	12
Y.MGKGVSKAVEHINKT.I	N	F3:4216	16.57	0	0	58	72
L.KVNQIGSVTESLQAC(+57.02)KLAQAN.G	N	F3:9313	31.56	0.083619	0.187107	343	363	C15:Carbamidomethylation:1000.00
E.FFRSGKY.D	N	F1:5201	19.71	0	0	251	257
L.LRIEEELGSKAKFAGRN.F	N	F1:12450	40.97	0	0	411	427
Y.DLDFKSPD.D	N	F2:8396	29.02	0	0	258	265
Y.M(+15.99)GKGVSKAVEHINK.T	N	F2:3367	13.73	0	0	58	71	M1:Oxidation (M):1000.00
L.ENKEGLELLKTA.I	N	F3:8536	29.29	0	0	219	230
R.GNPTVEVDLF.T	N	F2:13205	43.11	0	0.0711977	16	25
M.DGTENKSKF.G	N	F1:3741	14.85	0	0.407918	98	106
L.FRAAVPSGASTGIYEALEL.R	N	F1:13142	43.01	0.0957543	0.0271672	31	49
G.RNFRNPLAK	N	F1:5080	19.31	0	0	426	434
L.KIHAREI.F	N	F1:4967	18.99	0	0	5	11
L.ENKEGLEL.L	N	F2:7650	26.84	0	0	219	226
M.SILKIHAREI.F	N	F1:6424	23.39	0	0.667365	2	11
Y.MGKGVSKAVEHINKTIAPALVSKKLN.V	N	F3:8081	27.95	0	0	58	83
F.DSRGNPTVE.V	N	F1:3961	15.64	0	0	13	21
K.SC(+57.02)NC(+57.02)LLL.K	N	F3:11144	36.91	0	0	336	342	C2:Carbamidomethylation:1000.00;C4:Carbamidomethylation:1000.00
A.AVPSGASTGIYEAL.E	N	F3:11531	38.03	0	0.107384	34	47
V.SLAVC(+57.02)KAGAVEKGVPL.Y	N	F3:8500	29.18	0	1	115	130	C5:Carbamidomethylation:1000.00
F.TSKGL.F	N	F1:6586	23.86	0	0	26	30
L.YRHIAD.L	N	F1:3234	13.25	0	0	131	136
D.PFDQDDWGAW.Q	N	F2:14632	47.38	0	0.0159045	295	304
F.RSGKYDLD.F	N	F2:4039	15.99	0	0	253	260
L.KVNQIGSVTESLQAC(+57.02)KLA.Q	N	F1:9196	31.45	0.0367306	0.20463	343	360	C15:Carbamidomethylation:1000.00
L.GVSLAVC(+57.02).K	N	F2:8610	29.65	0	0.246648	113	119	C7:Carbamidomethylation:1000.00
N.KTIAPAL.V	N	F1:6695	24.18	0	0	71	77
N.PKRIAKAVNEKSC(+57.02)NC(+57.02)LL.L	N	F3:5396	20.14	0	0	325	341	C13:Carbamidomethylation:1000.00;C15:Carbamidomethylation:1000.00
W.QKFTASAGIQVVGDDLTVTNPK.R	N	F1:10248	34.53	0.417384	0.0802795	305	326
F.TASAGIQVV.G	N	F2:8595	29.6	0	0	308	316
L.NVTEQEKIDKLMIEMDGTENKSKFG.A	N	F3:8023	27.78	0	0.0174449	83	107
L.KIHAREIFDSRGNPTVEVDL.F	N	F2:9410	31.98	0.0138819	0	5	24
L.GVSLAVC(+57.02)KAGAVEKGVPLY.R	N	F1:9765	33.12	0	0.226783	113	131	C7:Carbamidomethylation:1000.00
F.GANAILGVSLAV.C	N	F2:14032	45.52	0	0.214732	107	118
Y.NQLLRIEEELGSK.A	N	F1:10302	34.69	0.0564729	0.0279483	408	420
F.M(+15.99)ILPVGAAN.F	N	F2:8879	30.44	0	0	169	177	M1:Oxidation (M):1000.00
L.LLKVNQIGSVTE.S	N	F3:9023	30.71	0.0204266	0.0557809	341	352
I.GKAGY.T	N	F1:3794	15.02	0	0	232	236
P.ALVSKKL.N	N	F2:4218	16.67	0	0	76	82
K.FGANAILGVSL.A	N	F1:14749	47.71	0	0.292673	106	116
V.EVDLF.T	N	F2:12226	40.23	0	0	21	25
Y.HNLKNVIKEKYGKDATNVGDE.G	N	F2:6158	22.51	0	0	190	210
D.GTENKSKFGANAIL.G	N	F2:7759	27.16	0.056415	0	99	112
Y.M(+15.99)GKGVSKAVEHINKT.I	N	F2:3582	14.52	0	0	58	72	M1:Oxidation (M):1000.00
L.NVTEQEKIDKLM(+15.99)IEMDGTENKSKFG.A	N	F1:7310	25.96	0	0	83	107	M12:Oxidation (M):0.00
C.RSERLAKY.N	N	F1:3236	13.26	0	0.0310324	400	407
L.AQANGWGVM(+15.99).V	N	F1:8371	29.05	0	0.0477918	360	368	M9:Oxidation (M):1000.00
F.TASAGIQVVGDDLTVTNPKRIAKAVN.E	N	F2:9492	32.23	0.0119203	0.091321	308	333
K.TGAPC(+57.02)RSERL.A	N	F3:4112	16.26	0	0	395	404	C5:Carbamidomethylation:1000.00
M.IEMDGTENKSKFGANAILGVSLAVC(+57.02)KAGAVEKGVPL.Y	N	F1:12786	41.95	0	0.154651	95	130	C25:Carbamidomethylation:1000.00
R.SGKYDLDFKSPDDPSRY.I	N	F1:8635	29.82	0.0143044	0	254	270
S.LQAC(+57.02)KL.A	N	F2:5370	20.18	0	0	354	359	C4:Carbamidomethylation:1000.00
Y.KSFIKD.Y	N	F1:3592	14.41	0	0	281	286
M.SILKIHARE.I	N	F1:4736	18.32	0	0.805576	2	10
N.KEGLELL.K	N	F2:9758	33	0	0	221	227
T.SKGLF.R	N	F3:6876	24.45	0	0	27	31
L.ENKEGLELLK.T	N	F3:7653	26.71	0	0	219	228
L.AGNSEVILPVPAFNVIN.G	N	F3:15473	49.78	0	0	138	154
M.GKGVSKAVEHINKTIAPAL.V	N	F3:7504	26.28	0	0.143322	59	77
F.KSPDDPSRYI.S	N	F2:16696	54.97	0	0	262	271
V.YHNLKNVIKEKY.G	N	F2:6177	22.57	0	0	189	200
F.FRSGKYDLDF.K	N	F2:9291	31.63	0.0209372	0	252	261
Y.HNLKNVIKEKYGKDATNVGDEGGFAPNI.L	N	F1:7746	27.22	0	0	190	217
I.NKTIAPAL.V	N	F2:4845	18.66	0	0.102328	70	77
L.AGNSEVILPVPA.F	N	F3:11471	37.85	0	0.0436611	138	149
F.NVINGGSHAGNKLAM(+15.99)QEF.M	N	F2:7844	27.42	0.038303	0	151	168	M15:Oxidation (M):1000.00
Y.NQLLRIEEE.L	N	F2:8548	29.46	0.0539202	0.0115856	408	416
L.NVTEQEKIDKLM(+15.99)IEMDGTENKSKFGANAILGVSL.A	N	F2:11876	39.21	0	0.299995	83	116	M12:Oxidation (M):0.00
L.KTAIGKAGYTDKVVIGMDVAASE.F	N	F2:8787	30.17	0	0	228	250
F.IKDYPVVSIEDPFDQDDWG.A	N	F2:14710	47.61	0	0.567172	284	302
L.MIEMDGTENKSKF.G	N	F3:7697	26.83	0.00568463	0	94	106
Y.TDKVVIGMD.V	N	F2:7850	27.43	0	0	237	245
M.ILPVGAANFREAMRIGAEVYHNLKNVIKEKY.G	N	F2:14900	48.17	0	0	170	200
F.MILPVGAANFRE.A	N	F1:11008	36.75	0	0.249696	169	180
L.VSKKLNVTEQEKI.D	N	F2:4660	18.11	0	0	78	90
Y.M(+15.99)GKGVSKAVEH.I	N	F1:2557	10.97	0	0	58	68	M1:Oxidation (M):1000.00
I.NKTIAPALVSKKLNVTEQEKIDKLMIEMDGTENKSKF.G	N	F1:7695	27.08	0	0	70	106
F.IKDYPVVSIEDPFDQDDWGAWQKF.T	N	F1:15276	49.33	0.131206	0.971473	284	307
Y.HNLKNVIKE.K	N	F2:4431	17.38	0	0	190	198
T.DKVVIGM(+15.99)DVAASEFFRSGKY.D	N	F1:12920	42.35	0	0	238	257	M7:Oxidation (M):1000.00
Y.DLDFKSPDDPSRYISPD.Q	N	F2:10717	35.81	0.0325675	0.0517956	258	274
Q.IGSVTESLQAC(+57.02)KL.A	N	F1:9447	32.18	0.0308036	0.0782073	347	359	C11:Carbamidomethylation:1000.00
S.IEDPFDQDDWGAW.Q	N	F2:16294	53.25	0	0	292	304
N.VTEQEKIDKLMIEMDGTENKSKF.G	N	F2:6541	23.62	0	0	84	106
N.QIGSVTESLQAC(+57.02)KLAQANGW.G	N	F2:11935	39.38	0	0.168055	346	365	C12:Carbamidomethylation:1000.00
F.GANAILGVS.L	N	F2:9529	32.34	0	0	107	115
L.KNVIKEKYGKDATNVGDEGGFAPNILEN.K	N	F3:12837	41.86	0	0	193	220
L.LLKVNQIG.S	N	F2:7737	27.1	0	0	341	348
Note: RT, retention time (min) ; BP, base peak ; cycIm, the “cyclic” immonium ion ; linIm, the “linear” immonium ion

## Sheet: Synapt-ENO1
Summary of the lactylated peptides identified from the recombinant ENO1 protein digests using SYNAPT G2 Si Q/TOF instrument.
Peptide	Lac modification(Yes/No)	Scan	RT	cycIm/BP	linIm/BP	Start	End	AScore	Library (Fig. 2a, S4a)
Y.EALELRDNDK(+72.02)TRY.M	Y	5966	28.15	0	0	45	57	K10:Lac:1000.00	pep #1
L.NVTEQEK(+72.02)IDKL.M	Y	6940	31.19	0.3094	0	83	93	K7:Lac:28.36	pep #7
L.NVTEQEKIDK(+72.02)L.M	Y	6547	29.95	0.431	0.056	83	93	K10:Lac:29.32	pep #6
C.KAGAVEK(+72.02)GVPL.Y	Y	6691	30.41	0.174	0.017	120	130	K7:Lac:45.99	no nonlactylated pep
N.VINGGSHAGNK(+72.02)LAMQEF.M	Y	8115	35.1	0.3354	0	152	168	K11:Lac:1000.00	pep #3
Y.HNLK(+72.02)NVIKEKYGKDATNVGDEGGFAPN.I	Y	6780	30.69	0.02	0	190	216	K4:Lac:61.69	pep #2
L.LK(+72.02)TAIGKAGY.T	Y	5872	27.85	0.832	0	227	236	K2:Lac:26.00	no nonlactylated pep
Y.DLDFK(+72.02)SPDDPSRY.I	Y	7915	34.47	0	0	258	270	K5:Lac:1000.00	pep #4
L.LLK(+72.02)VNQIGSVTESLQAC(+57.02)KL.A	Y	10162	42.32	0.734	0.338	341	359	K3:Lac:48.00;C17:Carbamidomethylation:1000.00	pep #13
L.LK(+72.02)VNQIGSVTESLQAC(+57.02)KL.A	Y	9597	40.3	0.65	0	342	359	K2:Lac:93.17;C16:Carbamidomethylation:1000.00	pep #5
L.K(+72.02)VNQIGSVTESLQAC(+57.02)KL.A	Y	8796	37.47	0.945	0.2073	343	359	K1:Lac:35.22;C15:Carbamidomethylation:1000.00	pep #11
L.LLKVNQIGSVTESLQAC(+57.02)K(+72.02)L.A	Y	9674	40.59	0.206	0	341	359	C17:Carbamidomethylation:1000.00;K18:Lac:40.42	pep #12
L.KVNQIGSVTESLQAC(+57.02)K(+72.02)L.A	Y	8505	36.48	1	0.215	343	359	C15:Carbamidomethylation:1000.00;K16:Lac:41.53	pep #10
L.RIEEELGSK(+72.02)AKF.A	Y	6795	30.73	1	0.038	412	423	K9:Lac:46.20	pep #9
L.RIEEELGSKAK(+72.02)F.A	Y	6604	30.14	0.882	0.035	412	423	K11:Lac:67.96	pep #8
L.KIHAREIF.D	N	4869	24.63			5	12
F.DSRGNPTVEVDLF.T	N	9610	40.34			13	25
L.FRAAVPSGASTGIY.E	N	7191	32.03			31	44
F.RAAVPSGASTGIY.E	N	5613	27.04			32	44
F.RAAVPSGASTGIYEALEL.R	N	9969	41.65			32	49
F.RAAVPSGASTGIYEAL.E	N	8000	34.74			32	47
F.RAAVPSGASTGIYEALELRDNDKTRY.M	N	7845	34.23			32	57
F.RAAVPSGASTGIYE.A	N	5478	26.61			32	45
F.RAAVPSGASTGIYEA.L	N	5832	27.73			32	46
I.YEALELRDNDKTRY.M	N	7819	34.15			44	57
Y.EALELRDNDKTRY.M	N	4922	24.82			45	57
L.ELRDNDKTRY.M	N	4910	24.78			48	57
Y.MGKGVSKAVEHINKTIAPAL.V	N	6623	30.2			58	77
Y.MGKGVSKAVEHINKTIAPA.L	N	5290	26.01			58	76
Y.MGKGVSKAVEHINKTIAPALVS.K	N	6801	30.75			58	79
Y.MGKGVSKAVEHINKTIAPALVSKKL.N	N	6717	30.49			58	82
Y.MGKGVSKAVEHINKTIAPALV.S	N	7067	31.61			58	78
Y.MGKGVSKAVEHINKTIAPALVSK.K	N	6293	29.16			58	80
Y.M(+15.99)GKGVSKAVEHINKTIAPALVSKKL.N	N	6358	29.37			58	82	M1:Oxidation (M):1000.00
S.KAVEHINKTIAPALVSKKL.N	N	5650	27.17			64	82
K.AVEHINKTIAPALVSKKL.N	N	6236	28.99			65	82
A.VEHINKTIAPALVSKKL.N	N	6098	28.55			66	82
H.INKTIAPALVSKKL.N	N	6215	28.92			69	82
I.NKTIAPALVSKKL.N	N	6217	28.93			70	82
K.TIAPALVSKKL.N	N	6612	30.16			72	82
I.APALVSKKL.N	N	6616	30.17			74	82
A.PALVSKKL.N	N	6218	28.93			75	82
S.KKLNVTEQEKIDKLMIEMDGTENKSKF.G	N	7572	33.31			80	106
S.KKLNVTEQEKIDKL.M	N	4902	24.76			80	93
K.KLNVTEQEKIDKL.M	N	5629	27.09			81	93
L.NVTEQEKIDKLMIEMDGTENKSKF.G	N	8317	35.77			83	106
L.NVTEQEKIDKLMIEMDGTEN.K	N	8634	36.92			83	102
L.NVTEQEKIDKL.M	N	5208	25.76	0		83	93
L.NVTEQEKIDKLMIEM(+15.99)DGTENKSKF.G	N	6943	31.2			83	106	M15:Oxidation (M):19.05
L.NVTEQEKIDKLMIEMDGTENKSKFG.A	N	6216	28.93			83	107
L.MIEMDGTENKSKF.G	N	5951	28.1			94	106
L.MIEM(+15.99)DGTENKSKF.G	N	5367	26.25			94	106	M4:Oxidation (M):0.00
L.M(+15.99)IEMDGTENKSKF.G	N	5820	27.69	0.065		94	106	M1:Oxidation (M):3.29
M.IEMDGTENKSKF.G	N	5908	27.97			95	106
I.EMDGTENKSKF.G	N	5906	27.96			96	106
E.MDGTENKSKF.G	N	5914	27.99			97	106
L.AVC(+57.02)KAGAVEKGVPL.Y	N	5564	26.89			117	130	C3:Carbamidomethylation:1000.00
L.AVC(+57.02)KAGAVEKGVPLY.R	N	6103	28.57			117	131	C3:Carbamidomethylation:1000.00
L.AVC(+57.02)KAGAVEK(+72.02)GVPL.Y	N	7050	31.55			117	130	C3:Carbamidomethylation:1000.00;K10:Lac:29.67
L.AVC(+57.02)K(+72.02)AGAVEKGVPL.Y	N	7243	32.21			117	130	C3:Carbamidomethylation:1000.00;K4:Lac:9.45
L.YRHIADLAGNSEVILPVPAFN.V	N	10129	42.21			131	151
L.YRHIADLAGNSEVILPVPAF.N	N	10613	44.02			131	150
L.YRHIADLAGNSEVILPVPA.F	N	9102	38.55	0.035		131	149
L.YRHIADLAGNSEVILPVPAFNVINGGSHAGNKL.A	N	9970	41.65			131	163
Y.RHIADLAGNSEVILPVPAFN.V	N	9986	41.7			132	151
Y.RHIADLAGNSEVILPVPAF.N	N	10388	43.17			132	150
Y.RHIADLAGNSEVILPVPAFNVINGGSHAGNKL.A	N	9869	41.27			132	163
L.AGNSEVILPVPAFN.V	N	10587	43.92			138	151
L.PVPAFNVINGGSHAGNKL.A	N	9987	41.7			146	163
F.NVINGGSHAGNKLAMQEF.M	N	7156	31.9			151	168
F.NVINGGSHAGNKLAM(+15.99)QEF.M	N	6021	28.32			151	168	M15:Oxidation (M):1000.00
N.VINGGSHAGNKLAMQEF.M	N	6657	30.3			152	168
I.NGGSHAGNKLAMQEF.M	N	6635	30.23			154	168
H.AGNKLAMQEF.M	N	7121	31.78			159	168
N.KLAMQEF.M	N	7065	31.61			162	168
F.MILPVGAANF.R	N	10519	43.66			169	178
M.ILPVGAANF.R	N	9100	38.54			170	178
L.PVGAANF.R	N	9081	38.48			172	178
F.REAMRIGAEVY.H	N	6125	28.64			179	189
A.MRIGAEVY.H	N	6626	30.21			182	189
Y.HNLKNVIKEKYGKDATNVGDEGGFAPN.I	N	5547	26.83			190	216
Y.HNLKNVIKEKYGKDATNVGDEGGF.A	N	5619	27.06			190	213
Y.HNLKNVIKEKY.G	N	4175	21.82			190	200
L.KNVIKEKYGKDATNVGDEGGFAPN.I	N	5018	25.16			193	216
L.KNVIKEKYGKDATNVGDEGGF.A	N	5042	25.23	0.162		193	213
L.KNVIKEKYGKDATNVGDEGGFAPNIL.E	N	7467	32.98			193	218
Y.GKDATNVGDEGGFAPN.I	N	5161	25.6			201	216
Y.GKDATNVGDEGGFAPNIL.E	N	8904	37.86			201	218
Y.GKDATNVGDEGGF.A	N	5328	26.13			201	213
F.APNILENKEGLELL.K	N	10115	42.17			214	227
N.ILENKEGLELL.K	N	9219	38.92			217	227
I.LENKEGLELL.K	N	7793	34.07			218	227
L.KTAIGKAGYTDKVVIGMDVAASEF.F	N	8941	37.99			228	251
Y.TDKVVIGMDVAASEF.F	N	9547	40.14			237	251
Y.TDKVVIGM(+15.99)DVAASEF.F	N	8070	34.96			237	251	M8:Oxidation (M):1000.00
Y.TDKVVIGM(+15.99)DVAASEFF.R	N	9827	41.12			237	252	M8:Oxidation (M):1000.00
F.RSGKYDLDFKSPDDPSRY.I	N	6058	28.43			253	270
Y.DLDFKSPDDPSRY.I	N	6778	30.68	0.006		258	270
Y.DLDFKSPDDPSR.Y	N	5802	27.64			258	269
Y.DLDFKSPDD.P	N	6246	29.02			258	266
D.LDFKSPDDPSRY.I	N	6742	30.57			259	270
L.DFKSPDDPSRY.I	N	6724	30.51			260	270
D.FKSPDDPSRY.I	N	6766	30.64			261	270
F.KSPDDPSRY.I	N	6790	30.72			262	270
K.SPDDPSRY.I	N	6728	30.52			263	270
S.PDDPSRY.I	N	6749	30.59			264	270
Y.ISPDQLADLY.K	N	9786	40.99		0.05	271	280
F.IKDYPVVSIED.P	N	7482	33.03	0.059	0.577	284	294
F.TASAGIQVVGDDLTVTNPKRIAKAVNEKSC(+57.02)NC(+57.02)L.L	N	8031	34.84			308	340	C30:Carbamidomethylation:1000.00;C32:Carbamidomethylation:1000.00
F.TASAGIQVVGDDLTVTNPKRIA.K	N	8042	34.87			308	329
F.TASAGIQVVGDDLTVTNPK.R	N	7975	34.66			308	326
F.TASAGIQVVGDDLTVTNPKR.I	N	7400	32.76			308	327
F.TASAGIQVVGDDLTVTNPKRIAKAVNEKSC(+57.02)NC(+57.02)LL.L	N	8633	36.92			308	341	C30:Carbamidomethylation:1000.00;C32:Carbamidomethylation:1000.00
F.TASAGIQVVGDDLTVTNPKRIAKA.V	N	7438	32.89			308	331
F.TASAGIQVVGDDLTVTNPKRIAKAVNEKSC(+57.02)N.C	N	7488	33.05		0.258	308	338	C30:Carbamidomethylation:1000.00
F.TASAGIQVVGDDLTVTNPKRIAKAVNEKSC(+57.02)NC(+57.02).L	N	7557	33.27			308	339	C30:Carbamidomethylation:1000.00;C32:Carbamidomethylation:1000.00
F.TASAGIQVVGDDLTVTNPKRIAKAVNEK.S	N	7495	33.07			308	335
F.TASAGIQVVGDDLTVTNPKRIAKAVNEKSC(+57.02)NC(+57.02)LLL.K	N	9165	38.74		0.265	308	342	C30:Carbamidomethylation:1000.00;C32:Carbamidomethylation:1000.00
F.TASAGIQVVGDDLTVTNPKRIAK.A	N	7320	32.48			308	330
F.TASAGIQVVGDDL.T	N	8556	36.65			308	320
A.GIQVVGDDLTVTNPKRIAKAVNEKSC(+57.02)NC(+57.02)L.L	N	7956	34.6			312	340	C26:Carbamidomethylation:1000.00;C28:Carbamidomethylation:1000.00
V.VGDDLTVTNPKRIAKAVNEKSC(+57.02)NC(+57.02)L.L	N	7984	34.68			316	340	C22:Carbamidomethylation:1000.00;C24:Carbamidomethylation:1000.00
L.TVTNPKRIAKAVNEKSC(+57.02)NC(+57.02)L.L	N	7979	34.67			321	340	C17:Carbamidomethylation:1000.00;C19:Carbamidomethylation:1000.00
L.TVTNPKRIAKAVNEKSC(+57.02)N.C	N	7485	33.04			321	338	C17:Carbamidomethylation:1000.00
V.TNPKRIAKAVNEKSC(+57.02)NC(+57.02)L.L	N	8036	34.85		0.044	323	340	C15:Carbamidomethylation:1000.00;C17:Carbamidomethylation:1000.00
C.LLLKVNQIGSVTESL.Q	N	9741	40.85			340	354
L.LLKVNQIGSVTESLQAC(+57.02)KL.A	N	9077	38.47			341	359	C17:Carbamidomethylation:1000.00
L.LLKVNQIGSVTESL.Q	N	8921	37.91		0.346	341	354
L.LLKVNQIGSVTESLQAC(+57.02).K	N	8559	36.66			341	357	C17:Carbamidomethylation:1000.00
L.LLKVNQIGSVTESLQ.A	N	8437	36.21			341	355
L.LLKVNQIGSVTESLQAC(+57.02)K(+72.02)L.A	N	9674	40.59			341	359	C17:Carbamidomethylation:1000.00;K18:Lac:40.42
L.LLKVNQIGSVTE.S	N	7176	31.97			341	352
L.LKVNQIGSVTESLQAC(+57.02)KL.A	N	8561	36.67	0.023		342	359	C16:Carbamidomethylation:1000.00
L.LKVNQIGSVTESLQAC(+57.02).K	N	7899	34.42			342	357	C16:Carbamidomethylation:1000.00
L.LKVNQIGSVTESL.Q	N	8232	35.49		0.238	342	354
L.LKVNQIGSVTE.S	N	6169	28.78			342	352
L.KVNQIGSVTESLQAC(+57.02)KL.A	N	7837	34.21		0.271	343	359	C15:Carbamidomethylation:1000.00
L.KVNQIGSVTESLQAC(+57.02).K	N	6736	30.55			343	357	C15:Carbamidomethylation:1000.00
L.KVNQIGSVTESL.Q	N	7071	31.63		0.447	343	354
L.KVNQIGSVTESLQAC(+57.02)K(+72.02)L.A	N	8505	36.48			343	359	C15:Carbamidomethylation:1000.00;K16:Lac:41.53
L.KVNQIGSVTESLQ.A	N	6480	29.75		0.087	343	355
K.VNQIGSVTESLQAC(+57.02)KL.A	N	8562	36.67	0.1		344	359	C14:Carbamidomethylation:1000.00
L.QAC(+57.02)KLAQANGW.G	N	6136	28.68			355	365	C3:Carbamidomethylation:1000.00
M.VSHRSGETEDTFIADLVVGL.C	N	11662	48.03			369	388
L.C(+57.02)TGQIKTGAPC(+57.02).R	N	3628	19.6			389	399	C1:Carbamidomethylation:1000.00;C11:Carbamidomethylation:1000.00
L.C(+57.02)TGQIK(+72.02)TGAPC(+57.02).R	N	4868	24.62			389	399	C1:Carbamidomethylation:1000.00;K6:Lac:1000.00;C11:Carbamidomethylation:1000.00
Y.NQLLRIEEELGSKAKF.A	N	9198	38.85			408	423
Y.NQLLRIEEELGSKAK.F	N	7821	34.16			408	422
Y.NQLLRIEEELGSKA.K	N	8675	37.05			408	421
Q.LLRIEEELGSKAKF.A	N	9115	38.59			410	423
L.LRIEEELGSKAKF.A	N	6989	31.35			411	423
L.RIEEELGSKAKF.A	N	5484	26.63			412	423
L.RIEEELGSKAK.F	N	5448	26.52			412	422
Note: RT, retention time (min) ; BP, base peak ; cycIm, the “cyclic” immonium ion ; linIm, the “linear” immonium ion
