# Supplementary material for: Discovery of Signature Cyclic Immonium Ion for Lactyllysine Reveals Widespread and Functional Lactylation on Non-histone Proteins
Source: Research Square preprint supplement (doi:10.21203/rs.3.rs-916390/v1), 2021-09-24
Supplement: Supplementary file 6 [file a72188601a262519f36f98d5.xlsx]

## Sheet: PEAKs
Summary of the lactylated PSMs retrieved from proteome data of six human tissue types using three different database search engines.
Tissue	Protein	Peptide	Unique	Scan	RT	Source File	AScore	cycIm/BP(%)
Ovary	P02768	LDELRDEGK(+72.02)ASSAK	Y	F12:4928	25.44	Adult_Ovary_bRP_Elite_57_f12.raw	K9:Lac:107.29	17.1386
Ovary	P02768	LAK(+72.02)TYETTLEK	Y	F21:5996	35.32	Adult_Ovary_bRP_Elite_57_f21.raw	K3:Lac:131.72	14.3705
Ovary	Q9Y394	IENFK(+72.02)SGVDADSSYFK	Y	F5:10930	57.39	Adult_Ovary_bRP_Elite_57_f05.raw	K5:Lac:67.38	41.0395
Ovary	Q9Y394	IENFK(+72.02)SGVDADSSYFK	Y	F5:10974	57.6	Adult_Ovary_bRP_Elite_57_f05.raw	K5:Lac:62.51	25.7452
Ovary	P02768	LK(+72.02)EC(+57.02)C(+57.02)EKPLLEK	Y	F19:5151	31.56	Adult_Ovary_bRP_Elite_57_f19.raw	K2:Lac:70.86;C4:Carbamidomethylation:1000.00;C5:Carbamidomethylation:1000.00	16.6552
Ovary	P16152	TDMAGPK(+72.02)ATK	Y	F11:2387	16.48	Adult_Ovary_bRP_Elite_57_f11.raw	K7:Lac:22.34	6.63562
Ovary	P16152	TDM(+15.99)AGPK(+72.02)ATK	Y	F11:1455	10.93	Adult_Ovary_bRP_Elite_57_f11.raw	M3:Oxidation (M):1000.00;K7:Lac:32.97	5.20205
Ovary	P02768	K(+72.02)YLYEIAR	Y	F7:8810	46.24	Adult_Ovary_bRP_Elite_57_f07.raw	K1:Lac:1000.00	24.1967
Ovary	O75179	DLLLK(+72.02)K	Y	F12:12978	53.25	Adult_Ovary_bRP_Elite_57_f12.raw	K5:Lac:1000.00	2.7586
Prostate	P62736:P63267:P68032	K(+72.02)DLYANNVLSGGTTMYPGIADR	N	F16:14617	63.35	Adult_Prostate_bRP_Elite_61_f16.raw	K1:Lac:1000.00	9.76842
Prostate	Q9Y394	IENFK(+72.02)SGVDADSSYFK	Y	F5:12065	56.11	Adult_Prostate_bRP_Elite_61_f05.raw	K5:Lac:158.53	13.2113
Prostate	Q9Y394	IENFK(+72.02)SGVDADSSYFK	Y	F5:12057	56.08	Adult_Prostate_bRP_Elite_61_f05.raw	K5:Lac:77.35	19.7217
Prostate	Q9Y394	IENFK(+72.02)SGVDADSSYFK	Y	F5:12177	56.57	Adult_Prostate_bRP_Elite_61_f05.raw	K5:Lac:78.25	19.5171
Prostate	P04406	ENGK(+72.02)LVINGNPITIFQERDPSK	Y	F19:15701	66.25	Adult_Prostate_bRP_Elite_61_f19.raw	K4:Lac:126.56	0.32015
Retina	Q9Y394	IENFK(+72.02)SGVDADSSYFK	Y	F5:12222	57.84	Adult_Retina_bRP_Elite_64_f05.raw	K5:Lac:141.98	15.8483
Retina	Q9Y394	IENFK(+72.02)SGVDADSSYFK	Y	F5:12071	57.84	Adult_Retina_bRP_Elite_64_f05.raw	K5:Lac:141.98	13.7253
Retina	Q9Y394	IENFK(+72.02)SGVDADSSYFK	Y	F5:12061	57.83	Adult_Retina_bRP_Elite_64_f05.raw	K5:Lac:101.21	16.3607
Retina	Q9Y394	IENFK(+72.02)SGVDADSSYFK	Y	F6:12902	57.08	Adult_Retina_bRP_Elite_64_f06.raw	K5:Lac:97.58	14.5602
Retina	Q9Y394	IENFK(+72.02)SGVDADSSYFK	Y	F5:12198	57.83	Adult_Retina_bRP_Elite_64_f05.raw	K5:Lac:90.32	22.3713
Retina	Q9Y394	IENFK(+72.02)SGVDADSSYFK	Y	F4:12936	57.2	Adult_Retina_bRP_Elite_64_f04.raw	K5:Lac:90.32	18.9334
Retina	Q9Y394	IENFK(+72.02)SGVDADSSYFK	Y	F6:12921	57.16	Adult_Retina_bRP_Elite_64_f06.raw	K5:Lac:81.94	22.2797
Retina	Q9Y394	RIENFK(+72.02)SGVDADSSYFK	Y	F6:11265	51.14	Adult_Retina_bRP_Elite_64_f06.raw	K6:Lac:156.90	38.3968
Retina	P62807:O60814:P58876:Q93079:Q5QNW6:Q99877:Q16778:P06899:P23527:Q99880:P33778:Q8N257	HAVSEGTK(+72.02)AVTK	N	F16:1947	15.43	Adult_Retina_bRP_Elite_64_f16.raw	K8:Lac:51.80	20.9474
Retina	P09972:P04075	DGADFAK(+72.02)WR	N	F5:11816	56.83	Adult_Retina_bRP_Elite_64_f05.raw	K7:Lac:1000.00	10.5298
Retina	P08237	NFATK(+72.02)MGAK	Y	F9:8622	38.84	Adult_Retina_bRP_Elite_64_f09.raw	K5:Lac:26.57	18.0795
Retina	Q6YN16	K(+72.02)VESTGAVPEFKEEK	Y	F17:7222	35.4	Adult_Retina_bRP_Elite_64_f17.raw	K1:Lac:25.86	33.2587
Retina	Q9P2K5	D(+42.01)ANK(+72.02)AEVPGATGGDSPHLQPAEPPGEPR	Y	F17:10322	46.53	Adult_Retina_bRP_Elite_64_f17.raw	D1:Acetylation (Protein N-term):1000.00;K4:Lac:1000.00	1.5093
Retina	P16152	TDMAGPK(+72.02)ATK	Y	F11:3426	23.57	Adult_Retina_bRP_Elite_64_f11.raw	K7:Lac:26.52	3.57707
Retina	P16152	TDMAGPK(+72.02)ATK	Y	F11:3412	23.57	Adult_Retina_bRP_Elite_64_f11.raw	K7:Lac:20.70	8.86941
Retina	P16152	TDM(+15.99)AGPK(+72.02)ATK	Y	F10:1882	11.96	Adult_Retina_bRP_Elite_64_f10.raw	M3:Oxidation (M):1000.00;K7:Lac:32.97	4.01076
Retina	P62807:O60814:Q16778:P06899	PEPAK(+72.02)SAPAPK	N	F10:3412	18.51	Adult_Retina_bRP_Elite_64_f10.raw	K5:Lac:57.71	8.65752
Retina	P62807:O60814:Q16778:P06899	PEPAK(+72.02)SAPAPK	N	F12:2955	23.38	Adult_Retina_bRP_Elite_64_f12.raw	K5:Lac:47.92	6.13321
Retina	Q9UPQ3	K(+72.02)LSNDLK	Y	F5:8161	43.26	Adult_Retina_bRP_Elite_64_f05.raw	K1:Lac:79.01	86.219
Retina	O60841	LEELEAK(+72.02)R	Y	F2:7293	44.48	Adult_Retina_bRP_Elite_64_f02.raw	K7:Lac:1000.00	2.31166
Retina	Q6YN16	K(+72.02)VESTGAVPEFK	Y	F23:8519	39.98	Adult_Retina_bRP_Elite_64_f23.raw	K1:Lac:40.85	19.1646
Retina	P84243:Q71DI3	KQLATK(+72.02)AAR	N	F17:2254	16.62	Adult_Retina_bRP_Elite_64_f17.raw	K6:Lac:79.02	3.33689
Spinal cord	P14136	AKEPTK(+72.02)LADVYQAELR	Y	F2:11320	53.46	Adult_Spinalcord_bRP_Elite_66_f02.raw	K6:Lac:59.42	11.8627
Spinal cord	P04075	ALSDHHIYLEGTLLK(+72.02)PNM(+15.99)VTPGHAC(+57.02)TQK	Y	F19:11655	52.02	Adult_Spinalcord_bRP_Elite_66_f19.raw	K15:Lac:39.87;M18:Oxidation (M):1000.00;C25:Carbamidomethylation:1000.00	7.85286
Spinal cord	P14136	FLEQQNK(+72.02)ALAAELNQLR	Y	F17:17602	74.1	Adult_Spinalcord_bRP_Elite_66_f17.raw	K7:Lac:1000.00	5.5622
Spinal cord	P14136	FLEQQNK(+72.02)ALAAELNQLR	Y	F17:17548	74.16	Adult_Spinalcord_bRP_Elite_66_f17.raw	K7:Lac:1000.00	9.47531
Spinal cord	P02686	TAHYGSLPQK(+72.02)SHGR	Y	F19:2430	18.79	Adult_Spinalcord_bRP_Elite_66_f19.raw	K10:Lac:1000.00	2.17103
Spinal cord	P02686	TAHYGSLPQK(+72.02)SHGR	Y	F19:2431	18.79	Adult_Spinalcord_bRP_Elite_66_f19.raw	K10:Lac:1000.00	5.29755
Spinal cord	P02686	TAHYGSLPQK(+72.02)SHGR	Y	F19:2442	18.79	Adult_Spinalcord_bRP_Elite_66_f19.raw	K10:Lac:1000.00	5.40591
Spinal cord	Q9Y394	RIENFK(+72.02)SGVDADSSYFK	Y	F6:11134	52.93	Adult_Spinalcord_bRP_Elite_66_f06.raw	K6:Lac:164.78	56.8457
Spinal cord	Q9Y394	IENFK(+72.02)SGVDADSSYFK	Y	F5:12632	58.05	Adult_Spinalcord_bRP_Elite_66_f05.raw	K5:Lac:103.78	17.0441
Spinal cord	Q9Y394	IENFK(+72.02)SGVDADSSYFK	Y	F5:12617	58.05	Adult_Spinalcord_bRP_Elite_66_f05.raw	K5:Lac:103.78	22.4865
Spinal cord	P69905	AAWGK(+72.02)VGAHAGEYGAEALER	Y	F4:11215	56.38	Adult_Spinalcord_bRP_Elite_66_f04.raw	K5:Lac:1000.00	2.97939
Spinal cord	P09972:P04075	DGADFAK(+72.02)WR	N	F5:12535	57.28	Adult_Spinalcord_bRP_Elite_66_f05.raw	K7:Lac:1000.00	11.5879
Spinal cord	P09972:P04075	DGADFAK(+72.02)WR	N	F5:12392	57.28	Adult_Spinalcord_bRP_Elite_66_f05.raw	K7:Lac:1000.00	12.867
Spinal cord	P14136	K(+72.02)IESLEEEIR	Y	F15:11001	48.06	Adult_Spinalcord_bRP_Elite_66_f15.raw	K1:Lac:1000.00	16.9778
Spinal cord	P14136	K(+72.02)IESLEEEIR	Y	F15:11026	48.06	Adult_Spinalcord_bRP_Elite_66_f15.raw	K1:Lac:1000.00	23.3384
Spinal cord	P07196	AK(+72.02)TLEIEAC(+57.02)R	Y	F18:6969	34.62	Adult_Spinalcord_bRP_Elite_66_f18.raw	K2:Lac:1000.00;C9:Carbamidomethylation:1000.00	2.96846
Spinal cord	P07196	AK(+72.02)TLEIEAC(+57.02)R	Y	F18:6958	34.68	Adult_Spinalcord_bRP_Elite_66_f18.raw	K2:Lac:1000.00;C9:Carbamidomethylation:1000.00	4.99942
Spinal cord	P16152	TDMAGPK(+72.02)ATK	Y	F11:2425	18.09	Adult_Spinalcord_bRP_Elite_66_f11.raw	K7:Lac:30.72	3.41674
Spinal cord	P14136	K(+72.02)IHEEEVRELQEQLAR	Y	F2:11080	52.49	Adult_Spinalcord_bRP_Elite_66_f02.raw	K1:Lac:1000.00	2.35523
Spinal cord	P09972:P04075	KDGADFAK(+72.02)WR	N	F5:8990	44.17	Adult_Spinalcord_bRP_Elite_66_f05.raw	K8:Lac:38.97	9.11813
Liver	Q9Y394	IENFK(+72.02)SGVDADSSYFK	Y	F1:13319	59.41	Adult_Liver_bRP_Elite_82_f01.raw	K5:Lac:118.56	31.6821
Liver	Q9Y394	IENFK(+72.02)SGVDADSSYFK	Y	F5:12399	60.09	Adult_Liver_bRP_Elite_82_f05.raw	K5:Lac:112.13	30.1406
Liver	P05062	DGVDFGK(+72.02)WR	Y	F9:14421	65.62	Adult_Liver_bRP_Elite_82_f09.raw	K7:Lac:1000.00	8.29271
Liver	P35270	GLQELK(+72.02)AK	Y	F16:5635	34.3	Adult_Liver_bRP_Elite_82_f16.raw	K6:Lac:20.41	5.74837
Liver	Q16698	TK(+72.02)GAFSR	Y	F12:3566	22.98	Adult_Liver_bRP_Elite_82_f12.raw	K2:Lac:1000.00	9.63578
Liver	P05062	ALNDHHVYLEGTLLK(+72.02)PN	Y	F12:12711	59.34	Adult_Liver_bRP_Elite_82_f12.raw	K15:Lac:1000.00	10.2941
Liver	P05062	ALNDHHVYLEGTLLK(+72.02)PN	Y	F11:12887	59.06	Adult_Liver_bRP_Elite_82_f11.raw	K15:Lac:1000.00	12.1253
Liver	P04114:Q9P2J5:P48634:Q7Z3Y7:Q9Y6V0:Q9HAU5:Q15311:Q14161:Q9Y4D1	K(+72.02)DLSK	N	F17:5162	31.04	Adult_Liver_bRP_Elite_82_f17.raw	K1:Lac:70.48	0.632285
Liver	P11712:Q14651:Q6ZMI0:Q96JB1:Q9UBU6:P46100:Q5H8A4:Q8IZD2:Q9ULS5	K(+72.02)DISK	N	F17:5162	31.04	Adult_Liver_bRP_Elite_82_f17.raw	K1:Lac:1000.00	0.632285
Testis	Q9Y394	IENFK(+72.02)SGVDADSSYFK	Y	F5:10280	58.52	Adult_Testis_bRP_Elite_68_f05.raw	K5:Lac:95.19	18.9893
Testis	Q6YN16	K(+72.02)VESTGAVPEFKEEK	Y	F17:6717	36.51	Adult_Testis_bRP_Elite_68_f17.raw	K1:Lac:27.38	9.48201
Testis	P16152	TDMAGPK(+72.02)ATK	Y	F11:2384	16.05	Adult_Testis_bRP_Elite_68_f11.raw	K7:Lac:34.94	3.92129
Testis	P16152	TDMAGPK(+72.02)ATK	Y	F11:2490	16.05	Adult_Testis_bRP_Elite_68_f11.raw	K7:Lac:24.24	4.87983
Testis	P16152	TDMAGPK(+72.02)ATK	Y	F11:2457	16.06	Adult_Testis_bRP_Elite_68_f11.raw	K7:Lac:20.70	6.8363
Testis	Q96Q11	TDSSDPLK(+72.02)PYQDFIIDSR	Y	F12:16266	74.08	Adult_Testis_bRP_Elite_68_f12.raw	K8:Lac:1000.00	0.481357
Testis	Q5T7B8	GQGPEK(+72.02)QVAER	Y	F21:11981	59.54	Adult_Testis_bRP_Elite_68_f21.raw	K6:Lac:1000.00	3.49599
Testis		QPNGSK(+72.02)HK		F22:2665	18.63	Adult_Testis_bRP_Elite_68_f22.raw	K6:Lac:22.85	15.8176
Testis	Q99996	DLQK(+72.02)QVK	Y	F21:5733	32.14	Adult_Testis_bRP_Elite_68_f21.raw	K4:Lac:25.67	1.62027
Note: RT, retention time (min) ; BP, base peak ; cycIm, the “cyclic” immonium ion

## Sheet: PD
Summary of the lactylated PSMs retrieved from proteome data of six human tissue types using three different database search engines.
Tissue	Master Protein Accessions	Annotated Sequence	Unique	Modifications	start	position	RT [min]	First Scan	Spectrum File	cycIm/BP(%)
Liver	Q9Y394	[R].IENFkSGVDADSSYFK.[I]	Y	K5(Lactylation)	317	321	59.415	13319	Adult_Liver_bRP_Elite_82_f01.raw	59.37
Liver	Q9Y394	[R].IENFkSGVDADSSYFK.[I]	Y	K5(Lactylation)	317	321	60.0918	12399	Adult_Liver_bRP_Elite_82_f05.raw	50.76
Liver	P05062	[K].DGVDFGkWR.[A]	Y	K7(Lactylation)	141	147	65.6251	14421	Adult_Liver_bRP_Elite_82_f09.raw	13.66
Liver	P16152	[R].TDMAGPkATK.[S]	Y	K7(Lactylation)	233	239	21.8026	3399	Adult_Liver_bRP_Elite_82_f10.raw	6.72
Liver	P16152	[R].TDMAGPkATK.[S]	Y	K7(Lactylation)	233	239	22.1573	3470	Adult_Liver_bRP_Elite_82_f10.raw	8.78
Liver	P16152	[R].TDMAGPkATK.[S]	Y	K7(Lactylation)	233	239	22.0401	3370	Adult_Liver_bRP_Elite_82_f11.raw	10.73
Liver	Q16698	[K].TkGAFSR.[L]	Y	K2(Lactylation)	245	246	22.9797	3566	Adult_Liver_bRP_Elite_82_f12.raw	13.15
Ovary	P02768	[K].YIcENQDSISSkLK.[E]	Y	C3(Carbamidomethyl); K12(Lactylation)	287	298	43.1171	7546	Adult_Ovary_bRP_Elite_57_f02.raw	7.5
Ovary	Q9Y394	[R].IENFkSGVDADSSYFK.[I]	Y	K5(Lactylation)	317	321	57.0921	10864	Adult_Ovary_bRP_Elite_57_f05.raw	9.7
Ovary	Q9Y394	[R].IENFkSGVDADSSYFK.[I]	Y	K5(Lactylation)	317	321	57.3888	10930	Adult_Ovary_bRP_Elite_57_f05.raw	32.6
Ovary	Q9Y394	[R].IENFkSGVDADSSYFK.[I]	Y	K5(Lactylation)	317	321	57.6008	10974	Adult_Ovary_bRP_Elite_57_f05.raw	25.06
Ovary	P02768	[K].kYLYEIAR.[R]	Y	K1(Lactylation)	161	161	46.2417	8810	Adult_Ovary_bRP_Elite_57_f07.raw	29.72
Ovary	P02768	[K].ADDKETcFAEEGkK.[L]	Y	C7(Carbamidomethyl); K13(Lactylation)	585	597	22.9396	4272	Adult_Ovary_bRP_Elite_57_f08.raw	7.54
Ovary	P16152	[R].TDmAGPkATK.[S]	Y	M3(Oxidation); K7(Lactylation)	233	239	10.9252	1455	Adult_Ovary_bRP_Elite_57_f11.raw	9.3
Ovary	P16152	[R].TDMAGPkATK.[S]	Y	K7(Lactylation)	233	239	16.4655	2384	Adult_Ovary_bRP_Elite_57_f11.raw	8.75
Ovary	P16152	[R].TDMAGPkATK.[S]	Y	K7(Lactylation)	233	239	16.4781	2387	Adult_Ovary_bRP_Elite_57_f11.raw	10.64
Ovary	P02768	[K].LDELRDEGkASSAK.[Q]	Y	K9(Lactylation)	206	214	25.4396	4928	Adult_Ovary_bRP_Elite_57_f12.raw	7.03
Ovary	P02768	[K].LkEccEKPLLEK.[S]	Y	K2(Lactylation); C4(Carbamidomethyl); C5(Carbamidomethyl)	299	300	31.5586	5151	Adult_Ovary_bRP_Elite_57_f19.raw	16.95
Ovary	P02768	[R].LAkTYETTLEK.[C]	Y	K3(Lactylation)	373	375	35.3156	5996	Adult_Ovary_bRP_Elite_57_f21.raw	21.95
Prostate	Q9Y394	[R].IENFkSGVDADSSYFK.[I]	Y	K5(Lactylation)	317	321	56.5935	12666	Adult_Prostate_bRP_Elite_61_f04.raw	26.97
Prostate	Q9Y394	[R].IENFkSGVDADSSYFK.[I]	Y	K5(Lactylation)	317	321	56.077	12057	Adult_Prostate_bRP_Elite_61_f05.raw	17.76
Prostate	Q9Y394	[R].IENFkSGVDADSSYFK.[I]	Y	K5(Lactylation)	317	321	56.1114	12065	Adult_Prostate_bRP_Elite_61_f05.raw	24.2
Prostate	Q9Y394	[R].IENFkSGVDADSSYFK.[I]	Y	K5(Lactylation)	317	321	56.5685	12177	Adult_Prostate_bRP_Elite_61_f05.raw	27.37
Prostate	P16152	[R].TDMAGPkATK.[S]	Y	K7(Lactylation)	233	239	14.8782	2456	Adult_Prostate_bRP_Elite_61_f11.raw	5.97
Prostate	P63267; P62736	[R].kDLYANNVLSGGTTMYPGIADR.[M]	N	K1(Lactylation)	#N/A	#N/A	63.2858	14602	Adult_Prostate_bRP_Elite_61_f16.raw	31.49
Prostate	P63267; P62736	[R].kDLYANNVLSGGTTMYPGIADR.[M]	N	K1(Lactylation)	#N/A	#N/A	63.3482	14617	Adult_Prostate_bRP_Elite_61_f16.raw	23.07
Retina	Q9Y394	[R].IENFkSGVDADSSYFK.[I]	Y	K5(Lactylation)	317	321	57.1984	12936	Adult_Retina_bRP_Elite_64_f04.raw	29.77
Retina	P04075; P09972	[K].DGADFAkWR.[C]	N	K7(Lactylation)	#N/A	#N/A	56.6245	11816	Adult_Retina_bRP_Elite_64_f05.raw	13.71
Retina	Q9Y394	[R].IENFkSGVDADSSYFK.[I]	Y	K5(Lactylation)	317	321	57.5532	12061	Adult_Retina_bRP_Elite_64_f05.raw	5.07
Retina	Q9Y394	[R].IENFkSGVDADSSYFK.[I]	Y	K5(Lactylation)	317	321	57.596	12071	Adult_Retina_bRP_Elite_64_f05.raw	39.81
Retina	Q9Y394	[R].IENFkSGVDADSSYFK.[I]	Y	K5(Lactylation)	317	321	58.0782	12198	Adult_Retina_bRP_Elite_64_f05.raw	38.2
Retina	Q9Y394	[R].IENFkSGVDADSSYFK.[I]	Y	K5(Lactylation)	317	321	58.1646	12222	Adult_Retina_bRP_Elite_64_f05.raw	47.68
Retina	Q9Y394	[K].RIENFkSGVDADSSYFK.[I]	Y	K6(Lactylation)	316	321	51.2294	11265	Adult_Retina_bRP_Elite_64_f06.raw	28.93
Retina	Q9Y394	[R].IENFkSGVDADSSYFK.[I]	Y	K5(Lactylation)	317	321	57.0788	12902	Adult_Retina_bRP_Elite_64_f06.raw	16.74
Retina	Q9Y394	[R].IENFkSGVDADSSYFK.[I]	Y	K5(Lactylation)	317	321	57.1467	12921	Adult_Retina_bRP_Elite_64_f06.raw	20.79
Retina	P08237	[R].NFATkMGAK.[A]	Y	K5(Lactylation)	674	678	38.7671	8622	Adult_Retina_bRP_Elite_64_f09.raw	22.45
Retina	P16152	[R].TDmAGPkATK.[S]	Y	M3(Oxidation); K7(Lactylation)	233	239	12.0177	1882	Adult_Retina_bRP_Elite_64_f10.raw	7.05
Retina	P16152	[R].TDMAGPkATK.[S]	Y	K7(Lactylation)	233	239	23.4346	3412	Adult_Retina_bRP_Elite_64_f11.raw	12.34
Retina	P16152	[R].TDMAGPkATK.[S]	Y	K7(Lactylation)	233	239	23.5182	3426	Adult_Retina_bRP_Elite_64_f11.raw	5.51
Retina	Q16778; Q5QNW6; Q8N257	[K].HAVSEGTkAVTK.[Y]	N	K8(Lactylation)	#N/A	#N/A	15.4348	1947	Adult_Retina_bRP_Elite_64_f16.raw	21.02
Retina	P84243; Q5TEC6; P68431; Q71DI3	[R].KQLATkAAR.[K]	N	K6(Lactylation)	#N/A	#N/A	16.6751	2254	Adult_Retina_bRP_Elite_64_f17.raw	5.89
Spinal cord	P14136	[R].AKEPTkLADVYQAELR.[E]	Y	K6(Lactylation)	106	111	53.3454	11320	Adult_Spinalcord_bRP_Elite_66_f02.raw	11.39
Spinal cord	P04075; P09972	[K].DGADFAkWR.[C]	N	K7(Lactylation)	#N/A	#N/A	57.0552	12392	Adult_Spinalcord_bRP_Elite_66_f05.raw	16.01
Spinal cord	P04075; P09972	[K].DGADFAkWR.[C]	N	K7(Lactylation)	#N/A	#N/A	57.5822	12535	Adult_Spinalcord_bRP_Elite_66_f05.raw	17.49
Spinal cord	Q9Y394	[R].IENFkSGVDADSSYFK.[I]	Y	K5(Lactylation)	317	321	57.9401	12632	Adult_Spinalcord_bRP_Elite_66_f05.raw	8.75
Spinal cord	Q9Y394	[K].RIENFkSGVDADSSYFK.[I]	Y	K6(Lactylation)	316	321	52.8525	11134	Adult_Spinalcord_bRP_Elite_66_f06.raw	26.13
Spinal cord	P16152	[R].TDMAGPkATK.[S]	Y	K7(Lactylation)	233	239	17.8055	2425	Adult_Spinalcord_bRP_Elite_66_f11.raw	5.08
Spinal cord	P14136	[R].kIESLEEEIR.[F]	Y	K1(Lactylation)	189	189	48.0126	11001	Adult_Spinalcord_bRP_Elite_66_f15.raw	26.79
Spinal cord	P14136	[R].kIESLEEEIR.[F]	Y	K1(Lactylation)	189	189	48.0953	11026	Adult_Spinalcord_bRP_Elite_66_f15.raw	28.84
Spinal cord	P14136	[R].FLEQQNkALAAELNQLR.[A]	Y	K7(Lactylation)	89	95	74.018	17548	Adult_Spinalcord_bRP_Elite_66_f17.raw	1.37
Spinal cord	P14136	[R].FLEQQNkALAAELNQLR.[A]	Y	K7(Lactylation)	89	95	74.214	17602	Adult_Spinalcord_bRP_Elite_66_f17.raw	13.38
Spinal cord	P07196	[K].AkTLEIEAcR.[G]	Y	K2(Lactylation); C9(Carbamidomethyl)	314	315	34.5448	6958	Adult_Spinalcord_bRP_Elite_66_f18.raw	9.33
Spinal cord	P07196	[K].AkTLEIEAcR.[G]	Y	K2(Lactylation); C9(Carbamidomethyl)	314	315	34.5834	6969	Adult_Spinalcord_bRP_Elite_66_f18.raw	4.29
Spinal cord	P02686	[R].TAHYGSLPQkSHGR.[T]	Y	K10(Lactylation)	200	209	18.7345	2430	Adult_Spinalcord_bRP_Elite_66_f19.raw	6.32
Spinal cord	P02686	[R].TAHYGSLPQkSHGR.[T]	Y	K10(Lactylation)	200	209	18.7375	2431	Adult_Spinalcord_bRP_Elite_66_f19.raw	17.95
Spinal cord	P02686	[R].TAHYGSLPQkSHGR.[T]	Y	K10(Lactylation)	200	209	18.778	2442	Adult_Spinalcord_bRP_Elite_66_f19.raw	15.92
Spinal cord	P04075	[K].ALSDHHIYLEGTLLkPNmVTPGHAcTQK.[F]	Y	K15(Lactylation); M18(Oxidation); C25(Carbamidomethyl)	216	230	52.0653	11655	Adult_Spinalcord_bRP_Elite_66_f19.raw	12.14
Testis	Q9Y394	[R].IENFkSGVDADSSYFK.[I]	Y	K5(Lactylation)	317	321	58.3501	10248	Adult_Testis_bRP_Elite_68_f05.raw	2.14
Testis	Q9Y394	[R].IENFkSGVDADSSYFK.[I]	Y	K5(Lactylation)	317	321	58.5036	10280	Adult_Testis_bRP_Elite_68_f05.raw	53.6
Testis	P16152	[R].TDMAGPkATK.[S]	Y	K7(Lactylation)	233	239	16.3971	2513	Adult_Testis_bRP_Elite_68_f10.raw	3.76
Testis	P16152	[R].TDMAGPkATK.[S]	Y	K7(Lactylation)	233	239	16.1465	2457	Adult_Testis_bRP_Elite_68_f11.raw	9.72
Testis	P16152	[R].TDMAGPkATK.[S]	Y	K7(Lactylation)	233	239	16.3072	2490	Adult_Testis_bRP_Elite_68_f11.raw	8.9
Testis	P02768	[K].LKEccEkPLLEK.[S]	Y	C4(Carbamidomethyl); C5(Carbamidomethyl); K7(Lactylation)	299	305	27.2813	4628	Adult_Testis_bRP_Elite_68_f21.raw	4.77
Note: RT, retention time (min) ; BP, base peak ; cycIm, the “cyclic” immonium ion

## Sheet: MQ
Summary of the lactylated PSMs retrieved from proteome data of six human tissue types using three different database search engines.
Tissue	Proteins	Unique	Sequence	Modified sequence	START	lac K SITE	Scan number	Raw file	cycIm/BP(%)
Ovary	sp|Q9Y394|DHRS7_HUMAN	Y	IENFKSGVDADSSYFK	_IENFK(Lactate)SGVDADSSYFK_	317	321	10864	Adult_Ovary_bRP_Elite_57_f05	9.7
Ovary	sp|Q9Y394|DHRS7_HUMAN	Y	IENFKSGVDADSSYFK	_IENFK(Lactate)SGVDADSSYFK_	317	321	10974	Adult_Ovary_bRP_Elite_57_f05	25.06
Ovary	sp|P02768|ALBU_HUMAN;CON__P02768-1	N	LAKTYETTLEK	_LAK(Lactate)TYETTLEK_	373	375	5996	Adult_Ovary_bRP_Elite_57_f21	21.95
Ovary	sp|P02768|ALBU_HUMAN;CON__P02768-1	N	LDELRDEGKASSAK	_LDELRDEGK(Lactate)ASSAK_	206	214	4928	Adult_Ovary_bRP_Elite_57_f12	7.03
Ovary	sp|P02768|ALBU_HUMAN;CON__P02768-1	N	LKECCEKPLLEK	_LK(Lactate)ECCEKPLLEK_	299	300	5151	Adult_Ovary_bRP_Elite_57_f19	16.95
Ovary	sp|P16152|CBR1_HUMAN	Y	TDMAGPKATK	_TDM(Oxidation (M))AGPK(Lactate)ATK_	233	239	1455	Adult_Ovary_bRP_Elite_57_f11	9.3
Prostate	sp|Q9Y394|DHRS7_HUMAN	Y	IENFKSGVDADSSYFK	_IENFK(Lactate)SGVDADSSYFK_	317	321	12666	Adult_Prostate_bRP_Elite_61_f04	26.97
Prostate	sp|Q9Y394|DHRS7_HUMAN	Y	IENFKSGVDADSSYFK	_IENFK(Lactate)SGVDADSSYFK_	317	321	12057	Adult_Prostate_bRP_Elite_61_f05	17.76
Prostate	sp|Q9Y394|DHRS7_HUMAN	Y	IENFKSGVDADSSYFK	_IENFK(Lactate)SGVDADSSYFK_	317	321	12177	Adult_Prostate_bRP_Elite_61_f05	27.37
Prostate	sp|Q9Y394|DHRS7_HUMAN	Y	IENFKSGVDADSSYFK	_IENFK(Lactate)SGVDADSSYFK_	317	321	12065	Adult_Prostate_bRP_Elite_61_f05	24.2
Prostate	sp|P02768|ALBU_HUMAN;CON__P02768-1	N	LKCASLQK	_LK(Lactate)CASLQK_	222	223	2555	Adult_Prostate_bRP_Elite_61_f22	3.76
Retina	sp|Q9Y394|DHRS7_HUMAN	Y	IENFKSGVDADSSYFK	_IENFK(Lactate)SGVDADSSYFK_	317	321	12936	Adult_Retina_bRP_Elite_64_f04	29.77
Retina	sp|P04075|ALDOA_HUMAN;sp|P09972|ALDOC_HUMAN	N	DGADFAKWR	_DGADFAK(Lactate)WR_	141	147	11816	Adult_Retina_bRP_Elite_64_f05	13.71
Retina	sp|Q9Y394|DHRS7_HUMAN	Y	IENFKSGVDADSSYFK	_IENFK(Lactate)SGVDADSSYFK_	317	321	12061	Adult_Retina_bRP_Elite_64_f05	5.07
Retina	sp|Q9Y394|DHRS7_HUMAN	Y	IENFKSGVDADSSYFK	_IENFK(Lactate)SGVDADSSYFK_	317	321	12198	Adult_Retina_bRP_Elite_64_f05	38.2
Retina	sp|Q9Y394|DHRS7_HUMAN	Y	IENFKSGVDADSSYFK	_IENFK(Lactate)SGVDADSSYFK_	317	321	12071	Adult_Retina_bRP_Elite_64_f05	29.37
Retina	sp|Q9Y394|DHRS7_HUMAN	Y	IENFKSGVDADSSYFK	_IENFK(Lactate)SGVDADSSYFK_	317	321	12222	Adult_Retina_bRP_Elite_64_f05	25.15
Retina	sp|Q9Y394|DHRS7_HUMAN	Y	IENFKSGVDADSSYFK	_IENFK(Lactate)SGVDADSSYFK_	317	321	12902	Adult_Retina_bRP_Elite_64_f06	16.74
Retina	sp|Q9Y394|DHRS7_HUMAN	Y	RIENFKSGVDADSSYFK	_RIENFK(Lactate)SGVDADSSYFK_	316	321	11265	Adult_Retina_bRP_Elite_64_f06	28.93
Retina	sp|P08237|PFKAM_HUMAN	Y	NFATKMGAK	_NFATK(Lactate)MGAK_	674	678	8622	Adult_Retina_bRP_Elite_64_f09	22.45
Retina	sp|Q16778|H2B2E_HUMAN;sp|P06899|H2B1J_HUMAN	N	PEPAKSAPAPK	_PEPAK(Lactate)SAPAPK_	2	6	3412	Adult_Retina_bRP_Elite_64_f10	1.41
Retina	sp|P16152|CBR1_HUMAN	Y	TDMAGPKATK	_TDM(Oxidation (M))AGPK(Lactate)ATK_	233	239	1882	Adult_Retina_bRP_Elite_64_f10	7.05
Retina	sp|P16152|CBR1_HUMAN	Y	TDMAGPKATK	_TDMAGPK(Lactate)ATK_	233	239	3412	Adult_Retina_bRP_Elite_64_f11	12.34
Retina	sp|P16152|CBR1_HUMAN	Y	TDMAGPKATK	_TDMAGPK(Lactate)ATK_	233	239	3426	Adult_Retina_bRP_Elite_64_f11	5.51
Retina	sp|Q16778|H2B2E_HUMAN;sp|P06899|H2B1J_HUMAN;sp|P23527|H2B1O_HUMAN;sp|P33778|H2B1B_HUMAN;sp|P58876|H2B1D_HUMAN;sp|Q8N257|H2B3B_HUMAN;sp|Q99877|H2B1N_HUMAN;sp|Q99880|H2B1L_HUMAN;sp|Q96A08|H2B1A_HUMAN	N	HAVSEGTKAVTK	_HAVSEGTK(Lactate)AVTK_	110	117	1947	Adult_Retina_bRP_Elite_64_f16	21.02
Spinal cord	sp|P14136|GFAP_HUMAN	Y	AKEPTKLADVYQAELR	_AKEPTK(Lactate)LADVYQAELR_	106	111	11320	Adult_Spinalcord_bRP_Elite_66_f02	11.39
Spinal cord	sp|P69905|HBA_HUMAN	Y	AAWGKVGAHAGEYGAEALER	_AAWGK(Lactate)VGAHAGEYGAEALER_	13	17	11215	Adult_Spinalcord_bRP_Elite_66_f04	0.85
Spinal cord	sp|P04075|ALDOA_HUMAN;sp|P09972|ALDOC_HUMAN	N	DGADFAKWR	_DGADFAK(Lactate)WR_	141	147	12535	Adult_Spinalcord_bRP_Elite_66_f05	17.49
Spinal cord	sp|Q9Y394|DHRS7_HUMAN	Y	IENFKSGVDADSSYFK	_IENFK(Lactate)SGVDADSSYFK_	317	321	12632	Adult_Spinalcord_bRP_Elite_66_f05	8.75
Spinal cord	sp|Q9Y394|DHRS7_HUMAN	Y	RIENFKSGVDADSSYFK	_RIENFK(Lactate)SGVDADSSYFK_	316	321	11134	Adult_Spinalcord_bRP_Elite_66_f06	26.13
Spinal cord	sp|Q9Y394|DHRS7_HUMAN	Y	RIENFKSGVDADSSYFK	_RIENFK(Lactate)SGVDADSSYFK_	316	321	11173	Adult_Spinalcord_bRP_Elite_66_f06	24.78
Spinal cord	sp|P14136|GFAP_HUMAN	Y	FLEQQNKALAAELNQLR	_FLEQQNK(Lactate)ALAAELNQLR_	89	95	17548	Adult_Spinalcord_bRP_Elite_66_f17	1.37
Spinal cord	sp|P14136|GFAP_HUMAN	Y	FLEQQNKALAAELNQLR	_FLEQQNK(Lactate)ALAAELNQLR_	89	95	17602	Adult_Spinalcord_bRP_Elite_66_f17	13.38
Spinal cord	sp|P07196|NFL_HUMAN	Y	AKTLEIEACR	_AK(Lactate)TLEIEACR_	314	315	6969	Adult_Spinalcord_bRP_Elite_66_f18	4.29
Spinal cord	sp|P04075|ALDOA_HUMAN	Y	ALSDHHIYLEGTLLKPNMVTPGHACTQK	_ALSDHHIYLEGTLLK(Lactate)PNM(Oxidation (M))VTPGHACTQK_	216	230	11655	Adult_Spinalcord_bRP_Elite_66_f19	12.14
Spinal cord	sp|P02686|MBP_HUMAN	Y	TAHYGSLPQKSHGR	_TAHYGSLPQK(Lactate)SHGR_	200	209	2430	Adult_Spinalcord_bRP_Elite_66_f19	6.32
Spinal cord	sp|P02686|MBP_HUMAN	Y	TAHYGSLPQKSHGR	_TAHYGSLPQK(Lactate)SHGR_	200	209	2431	Adult_Spinalcord_bRP_Elite_66_f19	17.95
Spinal cord	sp|P02686|MBP_HUMAN	Y	TAHYGSLPQKSHGR	_TAHYGSLPQK(Lactate)SHGR_	200	209	2442	Adult_Spinalcord_bRP_Elite_66_f19	15.92
Testis	sp|Q9Y394|DHRS7_HUMAN	Y	IENFKSGVDADSSYFK	_IENFK(Lactate)SGVDADSSYFK_	317	321	10248	Adult_Testis_bRP_Elite_68_f05	2.14
Testis	sp|Q9Y394|DHRS7_HUMAN	Y	IENFKSGVDADSSYFK	_IENFK(Lactate)SGVDADSSYFK_	317	321	10280	Adult_Testis_bRP_Elite_68_f05	53.6
Testis	sp|Q9Y394|DHRS7_HUMAN	Y	RIENFKSGVDADSSYFK	_RIENFK(Lactate)SGVDADSSYFK_	316	321	9873	Adult_Testis_bRP_Elite_68_f06	8.96
Testis	sp|P16152|CBR1_HUMAN	Y	TDMAGPKATK	_TDMAGPK(Lactate)ATK_	233	239	2384	Adult_Testis_bRP_Elite_68_f11	6.79
Testis	sp|P16152|CBR1_HUMAN	Y	TDMAGPKATK	_TDMAGPK(Lactate)ATK_	233	239	2490	Adult_Testis_bRP_Elite_68_f11	8.9
Liver	sp|Q9Y394|DHRS7_HUMAN	Y	IENFKSGVDADSSYFK	_IENFK(Lactate)SGVDADSSYFK_	317	321	13319	Adult_Liver_bRP_Elite_82_f01	0.5937
Liver	sp|Q9Y394|DHRS7_HUMAN	Y	IENFKSGVDADSSYFK	_IENFK(Lactate)SGVDADSSYFK_	317	321	12399	Adult_Liver_bRP_Elite_82_f05	0.5076
Note: RT, retention time (min) ; BP, base peak ; cycIm, the “cyclic” immonium ion
